# Supplementary material for: Turnover intention among primary health workers in China: a systematic review and meta-analysis
Source: PubMed Central journal article supplement — BMJ Open. 2020 Oct 16;10(10):e037117. doi: 10.1136/bmjopen-2020-037117 (PMC7569945; doi:10.1136/bmjopen-2020-037117), 2020-10-16
Supplement: bmjopen-2020-037117.draft_revisions.pdf [file bmjopen-2020-037117.draft_revisions.pdf]

# BMJ Open

BMJ Open is committed to open peer review. As part of this commitment we make the peer review history of every article we publish publicly available.

When an article is published we post the peer reviewers' comments and the authors' responses online. We also post the versions of the paper that were used during peer review. These are the versions that the peer review comments apply to.

The versions of the paper that follow are the versions that were submitted during the peer review process. They are not the versions of record or the final published versions. They should not be cited or distributed as the published version of this manuscript.

BMJ Open is an open access journal and the full, final, typeset and author-corrected version of record of the manuscript is available on our site with no access controls, subscription charges or pay-per-view fees (<http://bmjopen.bmj.com>).

If you have any questions on BMJ Open's open peer review process please email [info.bmjopen@bmj.com](mailto:info.bmjopen@bmj.com)

# BMJ Open

## Turnover intention among primary health workers in China: a systematic review and meta-analysis

|                               |                                                                                                                                                                                                                                                                                                                                                                                                                                                                                                                                                                                                                                                                                                                                                                                                                                                                                                                                                                                                                                                                                                                                                 |
|-------------------------------|-------------------------------------------------------------------------------------------------------------------------------------------------------------------------------------------------------------------------------------------------------------------------------------------------------------------------------------------------------------------------------------------------------------------------------------------------------------------------------------------------------------------------------------------------------------------------------------------------------------------------------------------------------------------------------------------------------------------------------------------------------------------------------------------------------------------------------------------------------------------------------------------------------------------------------------------------------------------------------------------------------------------------------------------------------------------------------------------------------------------------------------------------|
| Journal:                      | <i>BMJ Open</i>                                                                                                                                                                                                                                                                                                                                                                                                                                                                                                                                                                                                                                                                                                                                                                                                                                                                                                                                                                                                                                                                                                                                 |
| Manuscript ID                 | bmjopen-2020-037117                                                                                                                                                                                                                                                                                                                                                                                                                                                                                                                                                                                                                                                                                                                                                                                                                                                                                                                                                                                                                                                                                                                             |
| Article Type:                 | Original research                                                                                                                                                                                                                                                                                                                                                                                                                                                                                                                                                                                                                                                                                                                                                                                                                                                                                                                                                                                                                                                                                                                               |
| Date Submitted by the Author: | 19-Jan-2020                                                                                                                                                                                                                                                                                                                                                                                                                                                                                                                                                                                                                                                                                                                                                                                                                                                                                                                                                                                                                                                                                                                                     |
| Complete List of Authors:     | He, Rongxin; Xi'an Jiaotong University School of Public Policy and Administration; Xi'an Jiaotong University, Research Center for the Belt and Road Health Policy and Health Technology Assessment<br>Liu, Jinlin; Xi'an Jiaotong University School of Public Policy and Administration; Xi'an Jiaotong University, Research Center for the Belt and Road Health Policy and Health Technology Assessment<br>Zhang, WeiHong; Ghent University Faculty of Medicine and Health Sciences, International Centre for Reproductive Health<br>Zhu, Bin; Xi'an Jiaotong University School of Public Policy and Administration; Xi'an Jiaotong University, Research Center for the Belt and Road Health Policy and Health Technology Assessment<br>Zhang, Ning; Xi'an Jiaotong University School of Public Policy and Administration; Xi'an Jiaotong University, Research Center for the Belt and Road Health Policy and Health Technology Assessment<br>Mao, Ying; Xi'an Jiaotong University School of Public Policy and Administration; Xi'an Jiaotong University, Research Center for the Belt and Road Health Policy and Health Technology Assessment |
| Keywords:                     | PRIMARY CARE, Human resource management < HEALTH SERVICES ADMINISTRATION & MANAGEMENT, Health policy < HEALTH SERVICES ADMINISTRATION & MANAGEMENT, HEALTH SERVICES ADMINISTRATION & MANAGEMENT                                                                                                                                                                                                                                                                                                                                                                                                                                                                                                                                                                                                                                                                                                                                                                                                                                                                                                                                                 |
|                               |                                                                                                                                                                                                                                                                                                                                                                                                                                                                                                                                                                                                                                                                                                                                                                                                                                                                                                                                                                                                                                                                                                                                                 |

SCHOLARONE™  
Manuscripts

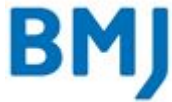

I, the Submitting Author has the right to grant and does grant on behalf of all authors of the Work (as defined in the below author licence), an exclusive licence and/or a non-exclusive licence for contributions from authors who are: i) UK Crown employees; ii) where BMJ has agreed a CC-BY licence shall apply, and/or iii) in accordance with the terms applicable for US Federal Government officers or employees acting as part of their official duties; on a worldwide, perpetual, irrevocable, royalty-free basis to BMJ Publishing Group Ltd ("BMJ") its licensees and where the relevant Journal is co-owned by BMJ to the co-owners of the Journal, to publish the Work in this journal and any other BMJ products and to exploit all rights, as set out in our [licence](#).

The Submitting Author accepts and understands that any supply made under these terms is made by BMJ to the Submitting Author unless you are acting as an employee on behalf of your employer or a postgraduate student of an affiliated institution which is paying any applicable article publishing charge ("APC") for Open Access articles. Where the Submitting Author wishes to make the Work available on an Open Access basis (and intends to pay the relevant APC), the terms of reuse of such Open Access shall be governed by a Creative Commons licence – details of these licences and which [Creative Commons](#) licence will apply to this Work are set out in our licence referred to above.

Other than as permitted in any relevant BMJ Author's Self Archiving Policies, I confirm this Work has not been accepted for publication elsewhere, is not being considered for publication elsewhere and does not duplicate material already published. I confirm all authors consent to publication of this Work and authorise the granting of this licence.

# Turnover intention among primary health workers in China: a systematic review and meta-analysis

Rongxin He<sup>1,2</sup>, Jinlin Liu<sup>1,2,5</sup>, Zhang Wei-Hong<sup>3</sup>, Bin Zhu<sup>1,2,4</sup>, Ning Zhang<sup>1,2</sup>, Ying Mao<sup>1,2\*</sup>

<sup>1</sup> School of Public Policy and Administration, Xi'an Jiaotong University, 28 Xianning West Road, Xi'an 710049, China; herongxin@stu.xjtu.edu.cn (R.H.); zhangningati@stu.xjtu.edu.cn (N.Z.)

<sup>2</sup> Research Center for the Belt and Road Health Policy and Health Technology Assessment, Xi'an Jiaotong University, 28 Xianning West Road, Xi'an 710049, China

<sup>3</sup> International Centre for Reproductive Health (ICRH), Ghent University, Ghent, Belgium; WeiHong.Zhang@UGent.be (Z.W.)

<sup>4</sup> Department of Public Policy, City University of Hong Kong, Hong Kong, 999077, China; binzhu2-c@my.cityu.edu.hk (B.Z.)

<sup>5</sup> Walter H. Shorenstein Asia-Pacific Research Center, Stanford University, Stanford, California 94305, USA; liujinlin\_xjtu@163.com (J.L.)

\* Correspondence: Ying Mao. Email: mao\_ying@mail.xjtu.edu.cn; Tel.: +86-029-8266-5482

## Abstract

**Objectives** To analyze the prevalence and determinants of turnover intention (the intent to change or leave current employment) in order to provide evidence for improving retention measures.

**Design** Systemic review and meta-analysis.

**Data sources** Four English language databases (PubMed, EMBASE, Cochrane Library and PsycINFO) and three Chinese databases (CNKI, CSPD and CBM) were searched up to October 2019.

**Eligibility criteria** Eligible studies were observational or descriptive studies conducted in mainland China, with human participants. The prevalence of turnover intention among health workers and related factors (potential risk factors) had to be explicitly reported in each included study.

**Data extraction and synthesis** Data were extracted by one author and reviewed independently by two other authors. For each factor analyzed by a meta-analysis, it was required that the factor is the same consistently among different studies, and at least three studies included it. The quality of studies was assessed using the Newcastle–Ottawa scale and heterogeneity was evaluated using  $I^2$  statistic.

**Results:** We identified 16 cross-sectional studies investigating a total of 37672 primary health workers (PHWs). The prevalence of turnover intention was 30.4% (95% CI 24.0-36.7%). Subgroup analysis revealed that the highest prevalence was observed in the community facilities and the eastern provinces of China. Meta-analyses indicated that 21 factors were significantly associated with turnover intention, included demographic factors (gender, age, education, marital status), job characteristic factors (title, work seniority, income, social status, organizational affiliation, work stress) and job satisfaction factors (learning and training opportunity, interpersonal relationship, keep busy and fulfilling, work condition and environment).

**Conclusion:** This study highlights the problem of the turnover intention among PHWs in China. There is a significant association between demographic factors, job characteristic factors, job satisfaction factors and turnover intention. So the comprehensive measures from these aspects should be taken towards retaining PHWs.

### Strengths and limitations of this study

- 1) This systematic review provides supplemental evidence from China to global studies on the turnover intention of primary health workers.
- 2) Meta-analysis and narrative analysis are performed to identify the risk factors of turnover intention among primary health workers.
- 3) Significant heterogeneity among the individual studies exists when performing the subgroup analysis and part of the meta-analysis.

## Introduction

Primary health care (PHC) addresses the majority of a person's health needs throughout their lifetime. The declaration of Astana declared that strengthening primary health care is the most inclusive, effective and efficient approach to enhance people's physical and mental health, as well as social well-being.[1] Primary health workers (PHWs) are direct providers of PHC, and their quantity directly decides the quantity, quality and outcomes of PHC.[2] These services should be provided with compassion, respect and dignity by health professionals who are well-trained, skilled, motivated and committed.[1] However, primary health institutions are facing significant labor shortages worldwide,[3] not only in the low and middle-income countries[2,4,5] but also in the developed countries.[6,7] In China, the PHC services are provided by community health centers and stations in the urban areas and by township health centers and village clinics in rural areas.[8] Nowadays, these health agencies are all facing the problem of staff turnover, aggravated the shortage of health workforce[9], which become one of the significant obstacles to strengthen China's primary healthcare services.[10]

Turnover intention (TI) is defined as the probability that an employee will leave his or her job within a specific period,[11] which was regarded as one of the best predictors of turnover behaviors.[12–15] Previous studies have explored the factors which influencing the turnover intentions of PHWs. A variety of them have been identified, such as demographic factors,[7,16–21] job satisfaction,[17,19,21–24] work stress,[12,17,24] burnout,[22,25] quality of work-life,[20] interpersonal communication,[26] violence from patients[27] et al. While these factors have been linked with TI definitely, some researchers focused on the factors which were off-the-job. Han et al.[28]found that key factors of community integration influencing overseas-trained doctors' decision to stay in or leave a rural community in Australia; Stewart et al.[16] reported that community satisfaction is a crucial predictor of intent to leave among rural and remote registered nurses in Canada; Chao et al. and Lu et al.[11,12] demonstrated there is a significant correlation between work-family conflict and TI of PHWs in Taiwan and Guangdong.

In China, many empirical studies have been conducted. However, most of them were published in Chinese, only a few studies about TI and risk factors of PHWs have been published in international journals, and no related systematic reviews have been found neither Chinese nor English. Therefore, this study aims to examine the prevalence of TI and identify the related factors among PHWs in China by conducting a systemic review and meta-analysis.

## Method

### Literature search

This systematic review and meta-analysis were performed following the PRISMA guidelines.[29,30] A systematic search of the literature was conducted up to October 2019 using five English language

databases (PubMed, EMBASE, Cochrane Library, PsycINFO) and three Chinese databases (CNKI, CSPD and CBM). No limits were applied for language and publication dates of coverage. The search strategy was based on a combination of "(Turnover Intention, or Departure Intention, or Demission Intention, or Leave Intention, or intent to leave), AND (Primary, Community, Rural, Countryside, District, Basic, Fundamental or Grassroots), AND (Health worker, Health officer, Health Manpower, Health Personnel, Medical Personnel, Medical worker, Medical staff, Doctor, Physician, or Nurse) and (China, or Chinese)". References of the retrieved studies were also checked and screened. **The full search strategy can be found in the supplementary tables S1.**

### **Study eligibility**

Eligible studies were published studies that reported TI prevalence and related determinants among Chinese PHWs. The eligibility criteria included: (1) Types of studies: original cross-sectional studies. Those presenting non-original data, such as reviews, editorials, opinion papers, or letters to the editor, were excluded. (2) Types of participants: Chinese PHWs. (3) Types of intervention: no intervention measures applied. (4) Types of outcome measures: the prevalence of TI and related factors reported in the study.

Eligibility assessment was conducted to screen titles, abstracts and full texts of the identified studies by two reviewers independently. Disagreements on which studies should be included or excluded were resolved by full group consensus.

### **Data extraction**

A piloted form referred to the Cochrane Effective Practice and Organization of Care Review Group (EPOC) data collection checklist,[31] was used to extract relevant data from the included full-text studies. The following data were extracted: author, publication year, the location where the study was carried out, participants, sample size, number of cases, assessment tools, prevalence of TI and related factors. Data extraction was conducted by one author and reviewed independently by two other authors, with disagreements resolved by discussion until consensus was reached.

### **Quality assessment**

The quality of studies was assessed using a modified Newcastle-Ottawa scale,[32] as recommended by the Cochrane Collaboration.[33] Studies received scores based on the design-specific sources of bias, methods for selecting participants, exposure measures, outcome variables and methods to control confounders.[34] The total score was 7 points, and all the included studies were grouped according to their scores, which included good (6–7), moderate (3–5) and poor (1–2).

### **Data synthesis and statistical analysis**

The main outcome in this review was the difference in prevalence or relative risk of TI among different groups. The prevalence of TI was estimated as the total number of TI cases divided by the total number of PHWs participating in the study. We compared the difference of TI between PHWs from different regions and institutions by subgroup analyses. The other outcome of this study was

1  
2  
3 to identify the association between factors and TI among PHWs in the form of the log odds ratio.  
4 For each factor analyzed by a meta-analysis, it was required related variables in the questionnaire  
5 are the same consistently among different studies, which meant it was feasible to be merged into  
6 two groups; meanwhile, at least three studies related to each factor had to be included in the meta-  
7 analysis. When performing a meta-analysis, the significance of the pooled odds ratio (OR) was  
8 determined by the Z-test. Heterogeneity was estimated by the Q statistic and evaluated using I<sup>2</sup>  
9 statistic.[35] A fixed-effect model was used to compute the summary risk estimate if there was no  
10 heterogeneity among the studies, whereas a random-effects model was used when heterogeneity  
11 existed (I<sup>2</sup>≥50%).[36] Publication bias was evaluated using Egger's test. All statistical analyses  
12 were performed using Stata V13.0 and RevMan V5.3. A two-tailed p value of <0.05 was considered  
13 to be statistically significant. We referred to the meta-analysis of observational studies in  
14 epidemiology (MOOSE) guideline.[37] If it was infeasible to make a quantitative synthesis and  
15 conduct a meta-analysis, a narrative approach and descriptive statistics were used by grouping  
16 studies that reported the same factors, and to compare their associations with TI of PHWs.

### 25 **Patient and public involvement**

26 Patients and the public were not involved in this study.

### 29 **Results**

30 A total of 455 records were identified through our initial database search (PubMed: 13, Embase: 14,  
31 Coherence: 6, PsycINFO: 0, CNKI: 124, WAN FANG Data: 270, CBM: 28). After removing the  
32 duplicate records, 208 records were screened based on title and abstract. Eighty-seven articles were  
33 included in the full-text review. Among these, 63 articles were eliminated due to lacking original  
34 data. Three articles were eliminated for the inappropriate study design. Five articles were excluded  
35 because missing data on risk factors of TI. Finally, 16 studies were included in this study. No  
36 additional studies were obtained after checking references of all the 16 retrieved articles. The study  
37 selection process was shown in Figure 1.

38  
39  
40  
41  
42  
43 **Figure 1 Flow diagram of the study selection**

### 45 **Study characteristics**

46 Table 1 presented the main characteristics of all 16 studies. These studies were all cross-sectional  
47 studies and performed in 24 provinces of China between 2011 and 2019. The selected studies  
48 included 37 672 participants, with a median sample size of 1073 (range 127–16157). Five studies  
49 were conducted in eastern China,[38–42] four in central provinces, [18,43–45] four in the west  
50 region.[17,46–48] four studies conducted in in urban area, [38,39,43,49] eight in rural area,  
51 [17,18,41,45–48,50] and four included both areas. [40,42,44,51] All studies reported the prevalence  
52 and related factors of TI among PHWs.

53  
54  
55  
56  
57 **Table 1 Characteristics of 16 included studies**



1  
2  
3  
4  
5 The determinants of TI would be analyzed by meta-analysis and content analysis. 47 factors were  
6 extracted in 16 included studies (Supplementary tables S2). It included three groups: 7 demographic  
7 factors, 22 job characteristic factors, and 18 job satisfaction factors. The average quality score of  
8 the 16 included studies was 5.25 of 7 points, indicating a moderate-average quality, assessed using  
9 the modified Newcastle-Ottawa scale (Supplementary tables S3). All studies were distributed in the  
10 medium and high quality.  
11  
12

### 13 **Prevalence of turnover intention among PHWs**

14  
15  
16 Table 2 showed the prevalence of turnover intention among PHWs in China. The pooled prevalence  
17 was 0.304 (95%CI: 0.240-0.367,  $P < 0.001$ ). the highest prevalence was 0.543 (95%CI: 0.457-  
18 0.630) reported by Gu et al. [38], whereas Zhang reported the lowest prevalence of 0.08 (95%CI:  
19 0.054-0.106). [48] The subgroup analysis by the region showed that, the highest prevalence was  
20 observed in the eastern China with a prevalence of 0.376 (95%CI: 0.231-0.521,  $P < 0.001$ ) followed  
21 by central regions at 0.319 (95%CI: 0.239-0.399,  $P < 0.001$ ) and then west at 0.232 (95%CI: 0.119-  
22 0.345,  $P < 0.001$ ). According to working setting, the highest prevalence occurred in PHWs working  
23 in the community, 0.412 (95% CI: 0.274-0.551,  $P < 0.001$ ), followed by the rural PHWs working  
24 in township and village. By sample size, the prevalence of TI was higher in studies having a sample  
25 of size  $< 1037$ , 0.355 (95% CI: 0.232-0.478,  $P < 0.001$ ) compared to those having a sample size  $\geq 1037$ ,  
26 0.255 (95%CI: 0.174-0.337,  $P < 0.001$ ). High heterogeneity was observed across the included  
27 studies.  
28  
29  
30  
31  
32  
33  
34

35 **Table 2 Prevalence of turnover intention among PHWs in China**

### 36 **Related factors of turnover intention among PHWs**

37  
38  
39 All studies reported demographic factors or job characteristic factors and determined their  
40 associations with TI of PHWs. Moreover, six studies explored the effects of job satisfaction factors,  
41 [18,41,44–47] 19 factors were feasible for included in the meta-analyses. The egger's linear  
42 regression tests on a natural logarithm scale of OR found no evidence of publication bias for the  
43 studies included in meta-analyses (Supplementary tables S4).  
44  
45  
46

### 47 **Demographic factors and turnover intention**

48  
49 The meta-analysis of demographic factors was based on 15 cross-sectional studies (Figure 2).  
50 Gender (male vs. female: OR:1.23, 95%CI: 1.08-1.40,  $P = 0.002$ ), [17,18,39–47,49,51] age (younger  
51 vs. older: OR: 1.47, 95%CI: 1.24-1.74,  $P < 0.00001$ ), [39,40,43,47–49,51] marriage status  
52 (unmarried vs. married, OR: 1.16, 95%CI: 1.04-1.29,  $P = 0.007$ )[17,40,42–44,46,47] were  
53 significantly associated with TI of PHWs, but education (low-education vs. high-education:  
54 OR:0.78, 95%CI: 0.60-1.02  $P = 0.07$ ). [17,18,40,42–45,47–49] were not statistically significant.  
55  
56  
57  
58  
59  
60

## Figure 2 Forest plots of demographic factors

### Job characteristic factors and turnover intention

Job characteristic factor was studied in nine studies (Figure 3). Job title (low-title vs. high-title: OR: 1.11, 95%CI: 1.03-1.21, P=0.007), [17,39,40,42-45,47,49] work seniority (short vs. long: OR: 1.17, 95%CI: 1.03-1.34, P =0.01), [39,45,48,49] organizational affiliation (strength vs. others: OR: 0.85, 95%CI: 0.73-1.00, P < 0.00001), [40,43,51] work stress (high vs. low: OR: 3.14, 95%CI: 2.73-3.61, P < 0.00001) [42,44,46,47,51] were significantly associated with TI of PHWs. However, occupation (doctor vs. nurse: OR:1.05, 95%CI: 0.78-1.41, P = 0.76) [39,40,42,43,49] were not statistically significant.

## Figure 3 Forest plots of job characteristic factors

### Job satisfaction factors and turnover intention

Six studies explored the association between job satisfaction factors and turnover intention (Figure 4). Overall job satisfaction (satisfied vs. dissatisfied: OR: 0.15, 95%CI: 0.04-0.51, P=0.002), [38,41,44] promotion and individual development space (satisfied vs. dissatisfied: OR: 0.19, 95%CI: 0.12-0.29, P < 0.00001), [18,46,47] interpersonal relationship (satisfied vs dissatisfied: OR: 0.20, 95%CI: 0.15-0.28, P<0.00001), [18,46,47] keep busy and fulfilling (satisfied vs dissatisfied: OR: 0.39, 95%CI: 0.33-0.47, P<0.00001), [18,41,46,47] individual value embodiment (satisfied vs dissatisfied: OR:0.16, 95%CI: 0.08-0.32, P<0.00001), [18,41,46] income satisfaction (satisfied vs dissatisfied: OR: 0.33, 95%CI: 0.11-0.95, P =0.04), [18,41,45-47] work condition and environment (satisfied vs dissatisfied: OR: 0.19, 95%CI: 0.15-0.23, P<0.00001), [18,41,46,47] level of attention by leaders (satisfied vs dissatisfied: OR: 0.20, 95%CI: 0.15-0.26, P<0.00001), [18,46,47] the competence of my manager in making decisions (satisfied vs dissatisfied: OR: 0.18, 95%CI: 0.10-0.32, P<0.00001), [18,46,47] and motivation and salary system (satisfied vs dissatisfied: OR: 0.21, 95%CI: 0.11-0.38, P < 0.00001) [44,46,47] were significantly associated with TI of PHWs.

## Figure 4 Forest plots of job satisfaction factors

All the other 28 exposures were analyzed for their associations with TI of PHWs under a narrative approach. In the demographic factors group, PHWs who work in remote region, [40] with lower income [17,46,51] and social status [41,46,47] were found to have high risks of TI significantly. No significant associations were found between TI and the nation. [45,46] Besides, the associations between TI and major in clinical medicine are inconclusive. [45,46]

Among job characteristic factors, seven were significantly associated with high risks of TI, including lower individual income levels in the local, [18,41] more severe emotional exhaustion, [41,45] more severe flattening of affect, [45] more participation in public health service, [50] longer working hours, [46] no career planning, [46] lack of insurance. [45] No significant

1  
2  
3 associations were found between TI and qualified to practice,[18] re-employ after retirement,[47]  
4 turnover experience,[46] career identity,[46] influence on family life,[49] patient trust.[46] Besides,  
5 the associations between TI and living condition is inconclusive.[46,47]  
6

7  
8 Regarding job satisfaction factors, PHWs who unsatisfied with work stability,[18,46] the chance to  
9 try my own methods of doing the job,[18] the chance to do something that makes use of my  
10 abilities,[18,46] work support,[41,47] policies practice, [18,44,46]and income fairness[44,46] were  
11 found to have high risks of TI significantly. However, no statistical significant association was  
12 found between TI and the satisfaction of the scientific research atmosphere or learning and the  
13 training opportunity. [45–47]  
14  
15

## 16 Discussion

17  
18 This systematic review presents an overall prevalence of TI (30.4%) among Chinese PHWs  
19 which indicated that three of ten PHWs intent to turnover. However, this finding is almost two times  
20 higher than some of the high-income countries. A study conducted in England showed that only  
21 11.8% of primary care doctors had high turnover intention.[52] A survey including 23,159 nurses  
22 from 10 European countries showed that showed that 9% of all these nurses intended to leave their  
23 profession, varied from 5 to 17% among countries[53] Another survey preformed among 2263  
24 physicians in American reported that 18.4% of them intended to leave the practice. [54] A study  
25 conducted in Canada reported 17.2% of registered nurses intended to leave the current nursing  
26 position. [16] Meanwhile, the prevalence of TI was lower than some low and middle-income  
27 countries, such as Ghana, [19] Iraqi, [55] South Africa,[21] and the Philippines. [56]  
28  
29

30 The subgroup analysis indicated that the variation of prevalence of TI among regions. The possible  
31 explanations for this variation might be the difference in the level of social and economic  
32 development and the workplace. In east China, there is a higher amount of urban hospitals than  
33 other regions, providing more jobs, higher pay and better work environment. It attract lots of PHWs  
34 move away from primary care practice.[57] As the rural PHWs, they usually settled down in rural  
35 areas, lacking access to urban hospitals compare to peers in the urban community.  
36  
37

38 This study extracted a broad scope of 47 related factors and determined their associations with TI  
39 of PHWs, identifying a total of 31 demographic, job characteristic and job satisfaction risk factors.  
40 Five demographic risk factors were determined to have significant associations with TI of PHWs,  
41 which showed that PHWs had high risks of TI were those who were male, younger, had a higher  
42 education, unmarried, work in the remote region. Some of these findings are in lines with studies  
43 done in South Africa, Philippines, Canada, Saudi Arabia, Ghana and Netherlands.[16,19–21,24,56]  
44 However, Bonenberger et al. [19] and Labrague et al.[56] showed that the association between  
45 gender and TI of PHWs was not statistically significant.  
46  
47

48 According to job characteristic factors, we concluded that PHWs who had shorter work seniority,  
49 higher work stress, longer working hours presented significantly high risks of TI. All of these  
50  
51  
52  
53  
54  
55  
56  
57  
58  
59  
60

1  
2  
3 findings are consistent with prior studies. Nevertheless, some findings are inconsistent with prior  
4 studies. Income was found to be significant statistically in the review, which is consistent with  
5 Almalki et al.,[20] but Labrague et al.[56] reported an insignificant association between income and  
6 TI. Occupation, level of the medical institution was not statistically significant with TI in the review,  
7 in accord with Warmelink et al.[24] and Labrague et al.[56] However, some studies reported showed  
8 the opposite results. [16,19]In addition, there are seven factors identified in the review were never  
9 or rarely reported in other countries, including title, social status, participation in public health  
10 service, insurance, career planning, emotional exhaustion or flattening of affect and authorized  
11 personnel, which were found to have significant associations with high risk of TI among PHWs in  
12 China.

13  
14  
15  
16  
17  
18  
19 There is a significant inverse association between job satisfaction and TI. In this review, we found  
20 that the low overall job satisfaction reported significantly higher risks of TI among PHWs, which is  
21 in line with Bonenberger et al.,[19] Warmelink et al.[24] and Delobelle et al.[21] Furthermore, most  
22 of the job satisfaction factors are also significant associated with TI of PHWs. However, these  
23 specific job satisfaction factors were rarely reported in previous studies.

24  
25  
26  
27 Notably, compared with previous studies focused on the family factor[16,20], our study did not find  
28 relevant evidence on family factors in China such as: community satisfaction, numbers of the  
29 dependent family member, family commitments.

30  
31  
32 To our knowledge, this is the first systematic review (including meta-analysis) to determine  
33 potential risk factors of TI among Chinese PHWs. Our findings present an overview of the current  
34 evidence from Mainland China. One strength of this review is it estimated the prevalence of TI  
35 among Chinese PHWs based on a large sample size with a total of 16 cross-sectional studies and 37  
36 672 participants. Another strength is that it determines the associations of a broad scope of potential  
37 risk factors. Limitations exist in this systematic review. Significant heterogeneity among the  
38 individual studies was found when performing the subgroup analysis and part of meta-analysis due  
39 to the lack of relevant studies. There is still needed to collect more relevant studies to make more  
40 in-depth analyses in the future.

#### 41 42 43 44 45 **Conclusion**

46  
47 The analysis highlights recognition on the problem of the turnover intention among PHWs in China.  
48 There is a significant association between demographic factors, job characteristic factors, job  
49 satisfaction factors and turnover intention. So the comprehensive measures from these aspects  
50 should be taken towards retaining PHWs. Moreover, PHWs in community or the east require special  
51 attention.

#### 52 53 54 55 **Funding**

This research was funded by the Major Project of National Social Science Fund of China: Research on big health putting prevention first and construction of healthy China (grant number 17ZDA079).

### Contributors

Rongxin He and Ying Mao conceived this research project. Jinlin Liu and Rongxin He developed the search strategy and Rongxin He searched the databases. Jinlin Liu, Bin Zhu, Zhangning and Rongxin He selected the studies. Rongxin He designed and executed the analyses, interpreted the findings, wrote the first draft, revised subsequent drafts, and prepared the manuscript. Ying Mao and Zhang Wei-Hong revised drafts of the manuscript.

### Competing interests

The authors declare that they have no competing interests.

### Reference

- 1 WHO; UNICEF; HIS; SDS. Declaration of Astana. *Global Conference on Primary Health Care* 2018.
- 2 Espinosa-González AB, Normand C. Challenges in the implementation of primary health care reforms: a qualitative analysis of stakeholders' views in Turkey. *BMJ Open* 2019;**9**:e027492. doi:10.1136/bmjopen-2018-027492
- 3 Truth U. GHWA-a\_universal\_truth\_report.
- 4 Nkomazana O, Mash R, Shaibu S, *et al.* Stakeholders' perceptions on shortage of healthcare workers in primary healthcare in Botswana: Focus group discussions. *PLoS ONE* 2015;**10**:1–15. doi:10.1371/journal.pone.0135846
- 5 Aluko JO, Anthea R, Marie Modeste RR. Manpower capacity and reasons for staff shortage in primary health care maternity centres in Nigeria: a mixed-methods study. *BMC Health Services Research* 2019;**19**:1–15. doi:10.1186/s12913-018-3819-x
- 6 MacLean L, Hassmiller S, Shaffer F, *et al.* Scale, Causes, and Implications of the Primary Care Nursing Shortage. *Annual Review of Public Health* 2014;**35**:443–57. doi:10.1146/annurev-publhealth-032013-182508
- 7 Gan Y, Gong Y, Chen Y, *et al.* Turnover intention and related factors among general practitioners in Hubei, China: A cross-sectional study. *BMC Family Practice* 2018;**19**:1–9. doi:10.1186/s12875-018-0752-3
- 8 Li H, Yuan B, Wang D, *et al.* Motivating factors on performance of primary care workers in China: a systematic review and meta-analysis. *BMJ open* 2019;**9**:e028619. doi:10.1136/bmjopen-2018-028619
- 9 Wu J, Yang Y. Inequality trends in the demographic and geographic distribution of health care professionals in China: Data from 2002 to 2016. *International Journal of Health Planning and Management* 2019;**34**:e487–508. doi:10.1002/hpm.2664
- 10 Yip WCM, Hsiao WC, Chen W, *et al.* Early appraisal of China's huge and complex health-care reforms. *The Lancet* 2012;**379**:833–42. doi:10.1016/S0140-6736(11)61880-1
- 11 Lu Y, Hu X-M, Huang X-L, *et al.* The relationship between job satisfaction, work stress, work–family conflict, and turnover intention among physicians in Guangdong, China: a cross-sectional study. *BMJ Open* 2017;**7**:e014894. doi:10.1136/bmjopen-2016-014894
- 12 Chao M-C, Jou R-C, Liao C-C, *et al.* Workplace Stress, Job Satisfaction, Job Performance, and Turnover Intention of Health Care Workers in Rural Taiwan. *Asia Pacific Journal of Public Health* 2015;**27**:NP1827–36. doi:10.1177/1010539513506604
- 13 Holtom BC, O'Neill BS. Job Embeddedness: A Theoretical Foundation for Developing a Comprehensive Nurse Retention Plan. *Journal of Nursing Administration* 2004;**34**:216–27. doi:10.1097/00005110-200405000-00005
- 14 Yamaguchi Y, Inoue T, Harada H, *et al.* Job control, work-family balance and nurses' intention to leave their profession and organization: A comparative cross-sectional survey. *International Journal of Nursing Studies* 2016;**64**:52–62. doi:10.1016/j.ijnurstu.2016.09.003

- 1  
2  
3 15 Battistelli A, Portoghese I, Galletta M, *et al.* Beyond the tradition: Test of an integrative  
4 conceptual model on nurse turnover. *International Nursing Review* 2013;**60**:103–11.  
5 doi:10.1111/j.1466-7657.2012.01024.x
- 6 16 Stewart NJ, D'Arcy C, Kosteniuk J, *et al.* Moving on? Predictors of intent to leave among rural  
7 and remote RNs in Canada. *Journal of Rural Health* 2011;**27**:103–13. doi:10.1111/j.1748-  
8 0361.2010.00308.x
- 9 17 Liu J, Zhu B, Wu J, *et al.* Job satisfaction, work stress, and turnover intentions among rural  
10 health workers: a cross-sectional study in 11 western provinces of China. *BMC Family Practice*  
11 2019;**20**:1–11. doi:10.1186/s12875-019-0904-0
- 12 18 Fang P, Liu X, Huang L, *et al.* Factors that influence the turnover intention of Chinese village  
13 doctors based on the investigation results of Xiangyang City in Hubei Province. *International*  
14 *Journal for Equity in Health* 2014;**13**:1–9. doi:10.1186/s12939-014-0084-4
- 15 19 Bonenberger M, Aikins M, Akweongo P, *et al.* The effects of health worker motivation and job  
16 satisfaction on turnover intention in Ghana: A cross-sectional study. *Human Resources for*  
17 *Health* 2014;**12**:1–12. doi:10.1186/1478-4491-12-43
- 18 20 Almalki MJ, FitzGerald G, Clark M. The relationship between quality of work life and  
19 turnover intention of primary health care nurses in Saudi Arabia. *BMC health services research*  
20 2012;**12**:314. doi:10.1186/1472-6963-12-314
- 21 21 Delobelle P, Rawlinson JL, Ntuli S, *et al.* Job satisfaction and turnover intent of primary  
22 healthcare nurses in rural South Africa: A questionnaire survey. *Journal of Advanced Nursing*  
23 2011;**67**:371–83. doi:10.1111/j.1365-2648.2010.05496.x
- 24 22 Roy A, Van Der Weijden T, De Vries N. Relationships of work characteristics to job  
25 satisfaction, turnover intention, and burnout among doctors in the district public-private mixed  
26 health system of Bangladesh. *BMC Health Services Research* 2017;**17**:1–11.  
27 doi:10.1186/s12913-017-2369-y
- 28 23 Zhang M, Yan F, Wang W, *et al.* Is the effect of person-organisation fit on turnover intention  
29 mediated by job satisfaction? A survey of community health workers in China. *BMJ Open*  
30 2017;**7**:1–8. doi:10.1136/bmjopen-2016-013872
- 31 24 Warmelink JC, Wieggers TA, de Cock TP, *et al.* Career plans of primary care midwives in the  
32 Netherlands and their intentions to leave the current job. *Human Resources for Health*  
33 2015;**13**:1–10. doi:10.1186/s12960-015-0025-3
- 34 25 Chen X, Ran L, Zhang Y, *et al.* Moderating role of job satisfaction on turnover intention and  
35 burnout among workers in primary care institutions : a cross-sectional study. 2019;:1–10.
- 36 26 Moreland JJ, Ewoldsen DR, Albert NM, *et al.* Predicting Nurses' Turnover: The Aversive  
37 Effects of Decreased Identity, Poor Interpersonal Communication, and Learned Helplessness.  
38 *Journal of Health Communication* 2015;**20**:1155–65. doi:10.1080/10810730.2015.1018589
- 39 27 Eneroth M, Gustafsson Sendén M, Schenck Gustafsson K, *et al.* Threats or violence from  
40 patients was associated with turnover intention among foreign-born GPs—a comparison of four  
41 workplace factors associated with attitudes of wanting to quit one's job as a GP. *Scandinavian*  
42 *Journal of Primary Health Care* 2017;**35**:208–13. doi:10.1080/02813432.2017.1333319
- 43 28 Han GS, Humphreys JS. Overseas-trained doctors in Australia: Community integration and  
44 their intention to stay in a rural community. *Australian Journal of Rural Health* 2005;**13**:236–  
45 41. doi:10.1111/j.1440-1584.2005.00708.x
- 46 29 Liberati A, Altman DG, Tetzlaff J, *et al.* The PRISMA statement for reporting systematic  
47 reviews and meta-analyses of studies that evaluate health care interventions: Explanation and  
48 elaboration. *PLoS Medicine* 2009;**6**. doi:10.1371/journal.pmed.1000100
- 49 30 Moher D, Liberati A, Tetzlaff J, *et al.* Preferred reporting items for systematic reviews and  
50 meta-analyses: The PRISMA statement. *PLoS Medicine* 2009;**6**.  
51 doi:10.1371/journal.pmed.1000097
- 52 31 EPOC. Cochrane Effective Practice and Organisation of Care Review Group (EPOC) - Data  
53 Collection Checklist. *Epoc* 2008.
- 54 32 Modesti PA. Cross Sectional Study Newcastle - Ottawa Quality Assessment Scale. *PLoS ONE*  
55 2016;**11**:1–2.
- 56 33 Higgins J, Green S. Chapter 22: Overview of reviews. *Cochrane handbook for systematic*  
57 *reviews of interventions*. *Cochrane Database of Systematic Reviews* 2008;:187–235.  
58 doi:10.1002/9780470712184.fmatter
- 59 34 Allen L, Williams J, Townsend N, *et al.* Socioeconomic status and non-communicable disease  
60 behavioural risk factors in low-income and lower-middle-income countries: a systematic  
61 review. *The Lancet Global Health* 2017;**5**:e277–89. doi:10.1016/S2214-109X(17)30058-X

- 1  
2  
3 35 Higgins JPT, Thompson SG, Deeks JJ, *et al.* Measuring inconsistency in meta-analyses. *BMJ: British Medical Journal* 2003;**327**:557–60. doi:10.1136/bmj.327.7414.557
- 4 36 Nikolakopoulou A, Mavridis D, Salanti G. How to interpret meta-analysis models: Fixed effect and random effects meta-analyses. *Evidence-Based Mental Health* 2014;**17**:64. doi:10.1136/eb-2014-101794
- 5  
6  
7  
8 37 Greenwood DC. Meta-analysis of observational studies. *Modern Methods for Epidemiology* 2012;:173–89. doi:10.1007/978-94-007-3024-3\_10
- 9 38 Gu Wen-juan, Jiang Qin-kang, Chen Min-hong LF. Empirical Study on Job Mobility and Job Satisfaction of Community Health Service Center Staff. *CHINESE PRIMARY HEALTH CARE* 2012;**26**:23–6. doi:10.3969/j.issn.1001-568X.2012.07.010
- 10  
11  
12 39 Yao Wei-guang, Wei Guo-wen, Xu Ai-guang, Qiu Li-yan, Chen Zhuo YH. Sample Survey of Human Resources and Work Situation of Community Health Services in Guangdong Province. *Chinese General Practice* 2011;**14**:1779–81. doi:10.3969/j.issn.1007-9572.2011.14.009
- 13  
14  
15 40 Liu Kun, Jing Li-mei, Zhou Xu-hong, Sun Xiao-ming, Wang Li, Lou Ji-quan, Chen Ceng-ceng WJ. Rural healthcare workers' turnover intention during the reform incentive policies for rural healthcare professionals implemented. *Chinese General Practice* 2017;**20**:2338–41. doi:10.3969/j.issn.1007-9572.2017.19.009
- 16  
17  
18 41 Lu Yue, Ju Lei, Li Jiang-fei, Bi Lei, Zhu Zhi-Qiang, Li Hai-yan ZW. Analyzing the Stability of Rural Doctor Team in Shandong Province in Different Dimensions. *The Chinese Health Service Management* 2018;:517–20. doi:CNKI:SUN:ZWSG.0.2018-07-016
- 19  
20  
21 42 OU Wei—lin LKML. Study on fatigue status and turnover intention of primary health care workers in Guangdong. *Guangdong Medical Journal* 2018;**39**:3081–5. doi:10.13820/j.cnki.gdyx.20181107.007
- 22  
23  
24 43 Xu Yin, Ding Hong HZ. Study on the relationship between the subjective turnover intention of community health service personnel and demographic characteristics. *Anhui Medical Journal* 2012;**33**:481–4. doi:10.3969/j.issn.1000-0399.2012.04.038
- 25  
26  
27 44 Zhou Qiong, Guan Wen-bo XJ. Correlation analysis of turnover tendency and working factors of primary nursing staff in a district of wuhan city. *Journal of mathematical medicine* 2016;**29**:703–5. doi:10.3969/j.issn.1004-4337.2016.05.037
- 28  
29  
30 45 Shen Bing-jie, Hu Lin-lin, You Li-li LY. Turnover intention and its influencing factors among village doctors in central China. *Chinese General Practice* 2018;**21**:4183–7. doi:10.12114/j.issn.1007-9572.2018.34.005
- 31  
32  
33 46 Zhenzhen R. *Turnover intention and correlates of health personnel at county and township levels in Yunnan*. Kunming medical university. 2013.
- 34  
35  
36 47 Xu Li, Wang Jun-hua, Huang Wen-yong, Yang Jing-yuan JZ. Study of the turnover intention among rural health workers in Guizhou. *Chinese Primary Health Care* 2015;**29**:27–30. doi:10.3969/j.issn.1001-568X.2015.01.0010
- 37  
38  
39 48 Zhang Su-mei LX. Investigation and analysis on the turnover intention of nurses in primary and secondary hospitals in shaanxi province. *Journal of Qilu Nursing* 2013;**19**:55–7. doi:10.3969/j.issn.1006-7256.2013.08.027
- 40  
41  
42 49 Sun Y, Luo Z, Fang P. Factors influencing the turnover intention of chinese community health service workers based on the investigation results of five provinces. *Journal of Community Health* 2013;**38**:1058–66. doi:10.1007/s10900-013-9714-9
- 43  
44  
45 50 Zhang Huan, Pan Wen, Yan Di, Zhao Yang, Zhang Min-min LX. The current situation of nursing staff and their turnover in township health centers. *Chinese Journal of Health Policy* 2015;**8**:23–8. doi:10.3969/j.issn.1674-2982.2015.08.005
- 46  
47  
48 51 Guan-yu L. *Analysis on human resource situation and influencing factors of community-level healthcare institutions*. 2019.
- 49  
50  
51 52 Hann M, Reeves D, Sibbald B. Relationships between job satisfaction, intentions to leave family practice and actually leaving among family physicians in England. *European Journal of Public Health* 2011;**21**:499–503. doi:10.1093/eurpub/ckq005
- 52  
53  
54 53 Heinen MM, van Achterberg T, Schwendimann R, *et al.* Nurses' intention to leave their profession: A cross sectional observational study in 10 European countries. *International Journal of Nursing Studies* 2013;**50**:174–84. doi:10.1016/j.ijnurstu.2012.09.019
- 55  
56  
57 54 Kao AC, Jager AJ, Koenig BA, *et al.* Physician Perception of Pay Fairness and its Association with Work Satisfaction, Intent to Leave Practice, and Personal Health. *Journal of General Internal Medicine* 2018;:1–6. doi:10.1007/s11606-017-4303-8
- 58  
59  
60

- 1  
2  
3 55 Wang H, Abajobir AA, Abate KH, *et al.* Global, regional, and national under-5 mortality, adult  
4 mortality, age-specific mortality, and life expectancy, 1970-2016: A systematic analysis for the  
5 Global Burden of Disease Study 2016. *The Lancet* 2017;**390**:1084–150. doi:10.1016/S0140-  
6 6736(17)31833-0
- 7 56 Labrague LJ, McEnroe – Petite DM, Tsaras K, *et al.* Organizational commitment and turnover  
8 intention among rural nurses in the Philippines: Implications for nursing management.  
9 *International Journal of Nursing Sciences* 2018;**5**:403–8. doi:10.1016/j.ijnss.2018.09.001
- 10 57 Wen T, Zhang Y, Wang X, *et al.* Factors influencing turnover intention among primary care  
11 doctors: A cross-sectional study in Chongqing, China. *Human Resources for Health*  
12 2018;**16**:1–11. doi:10.1186/s12960-018-0274-z
- 13  
14  
15  
16  
17  
18  
19  
20  
21  
22  
23  
24  
25  
26  
27  
28  
29  
30  
31  
32  
33  
34  
35  
36  
37  
38  
39  
40  
41  
42  
43  
44  
45  
46  
47  
48  
49  
50  
51  
52  
53  
54  
55  
56  
57  
58  
59  
60

For peer review only



Table 1 Characteristics of 16 included studies

| Authors     | Location                          | Participants                   | Number (Qualified rate %) | Assessment tools                                              | Prevalence, N (%)                                                          | Ref. No. |
|-------------|-----------------------------------|--------------------------------|---------------------------|---------------------------------------------------------------|----------------------------------------------------------------------------|----------|
| Xu,2012     | Anhui                             | City community                 | 1109(92.96%)              | Dichotomous question                                          | 224 persons (20.2%)                                                        | 5        |
| Gu,2012     | Shanghai,                         | City community                 | 127(86.99%)               | Dichotomous question                                          | 69 persons (56.69%)                                                        | 7        |
| Yao,2011    | Guangdong                         | City community                 | 335(95.7%)                | Dichotomous question                                          | 178 persons (52.0%)                                                        | 13       |
| Lu,2018     | Shandong                          | Rural area (village)           | 1037(98.57%)              | The Self-made 10items 5-point Likert Turnover intention Scale | 498 persons (48.02%)<br>(Score of > 32 out of 50 means turnover intention) | 15       |
| Ou,2018     | Guangdong                         | City community and Rural area  | 1252(87.43%)              | Frah Turnover intention Scale                                 | 227 persons (18. 13%)<br>(Score of > 3 out of 5)                           | 17       |
| Xu,2015     | Guizhou                           | Rural area (township)          | 704(96.6%)                | Dichotomous question                                          | 247 persons (35.10%)                                                       | 19       |
| Liu,2019    | Not Stated                        | City community and Rural area  | 16157(100.00%)            | Dichotomous question                                          | 1858 persons (11.50%)                                                      | 33       |
| Zhang,2013  | Shaanxi                           | Rural area (township)          | 425(99.53%)               | Dichotomous question                                          | 34 persons (8.00%)                                                         | 39       |
| Liu,2017    | Shanghai                          | City community and Rural area  | 3295(86.70%)              | Dichotomous question                                          | 520 persons (15.80%)                                                       | 49       |
| Shen,2018   | 8 central provinces <sup>1</sup>  | Rural area (village)           | 1669 (100.00%)            | Dichotomous question                                          | 568 persons (34.03%)                                                       | 54       |
| Zhou,2016   | Wuhan                             | City community and Rural area  | 755 (83.90%)              | Michael & Spector Turnover intention Scale                    | 278 persons (36.86%)<br>(Score of > 3 out of 5)                            | 55       |
| Zhang,2015  | Shandong, Anhui, Shanxi           | Rural area (township)          | 167(100.00%)              | Dichotomous question                                          | 49 persons (29. 34%)                                                       | 63       |
| Wan,2013    | Yunnan                            | Rural area (township & county) | 493(94.80%)               | Dichotomous question                                          | 101 persons (29. 34%)                                                      | 70       |
| Fang,2014   | Hubei                             | Rural area (village)           | 1889(97.88%)              | Dichotomous question                                          | 695 persons (36.8%)                                                        | 76       |
| Sun,2013    | 5 provinces <sup>2</sup>          | City community                 | 3212(99.32%)              | Dichotomous question                                          | 1243 persons (38.7%)                                                       | 79       |
| Liu JL,2019 | 11 western provinces <sup>3</sup> | Rural area (township & county) | 5046(90.4%0%)             | Dichotomous question                                          | 1468 persons (29.1%)                                                       | 86       |

<sup>1</sup>8 provinces: Shanxi, Jilin, Heilongjiang, Anhui, Jiangxi, Henan, Hubei and Hunan

<sup>2</sup>5 provinces: Zhejiang, Guangdong, Guizhou, Hebei, and Hubei

<sup>3</sup>11 provinces: Gansu, Guangxi, Guizhou, Inner Mongolia, Ningxia, Qinghai, Shaanxi, Sichuan, Tibet, Xinjiang, and Yunnan

**Table 2 Prevalence of turnover intention among PHWs in China**

| Variables       | Characteristic    | Included studies | Prevalence (95%CI)  | Q test (I <sup>2</sup> ) |
|-----------------|-------------------|------------------|---------------------|--------------------------|
| Overall         |                   | 16               | 0.304[0.240, 0.367] | 99.5%                    |
| By region       | East              | 5                | 0.376[0.231, 0.521] | 99.3%                    |
|                 | Central           | 4                | 0.319[0.239, 0.399] | 97.6%                    |
|                 | West              | 4                | 0.232[0.119, 0.345] | 98.8%                    |
| By participants | Work in village   | 3                | 0.395[0.321, 0.470] | 96.3%                    |
|                 | Work in township  | 5                | 0.234[0.144, 0.342] | 98.4%                    |
|                 | Work in community | 4                | 0.412[0.274, 0.551] | 98.7%                    |
| By sample size  | <1037             | 8                | 0.355[0.232, 0.478] | 99.7%                    |
|                 | ≥1037             | 8                | 0.255[0.174, 0.337] | 98.8%                    |

1  
2  
3  
4  
5  
6  
7  
8  
9  
10  
11  
12  
13  
14  
15  
16  
17  
18  
19  
20  
21  
22  
23  
24  
25  
26  
27  
28  
29  
30  
31  
32  
33  
34  
35  
36  
37  
38  
39  
40  
41  
42  
43  
44  
45  
46  
47  
48  
49  
50  
51  
52  
53  
54  
55  
56  
57  
58  
59  
60

For peer review only

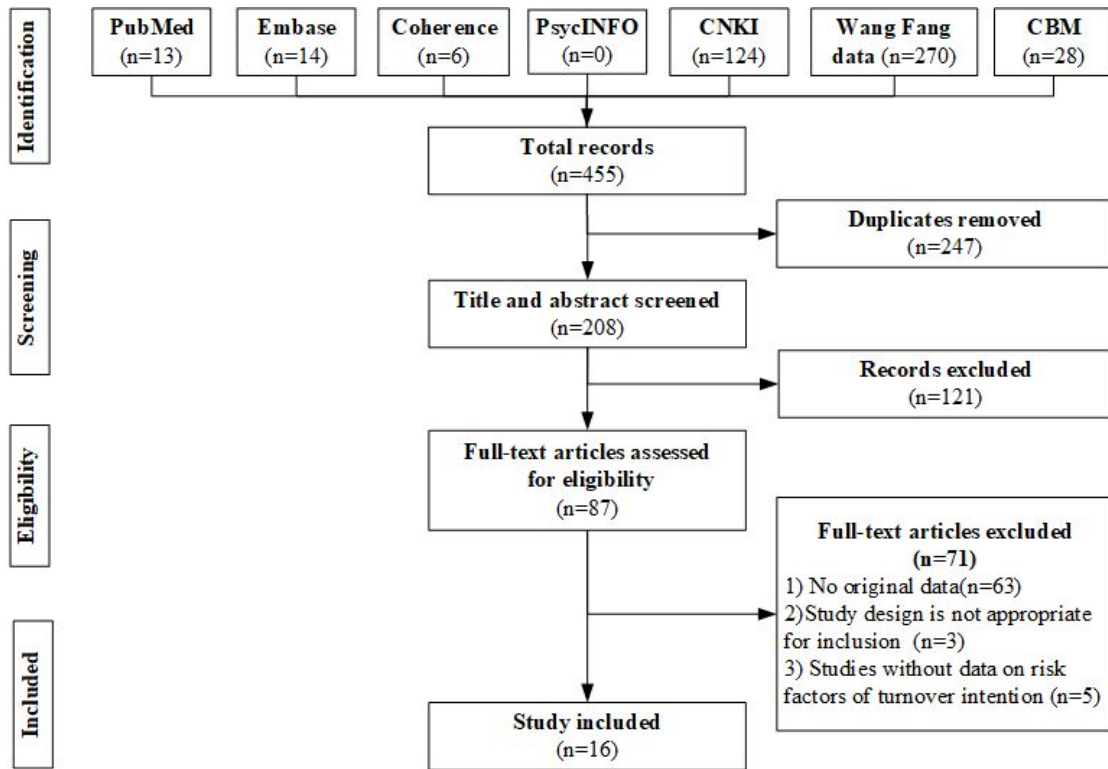

Figure 1 Flow diagram of the study selection

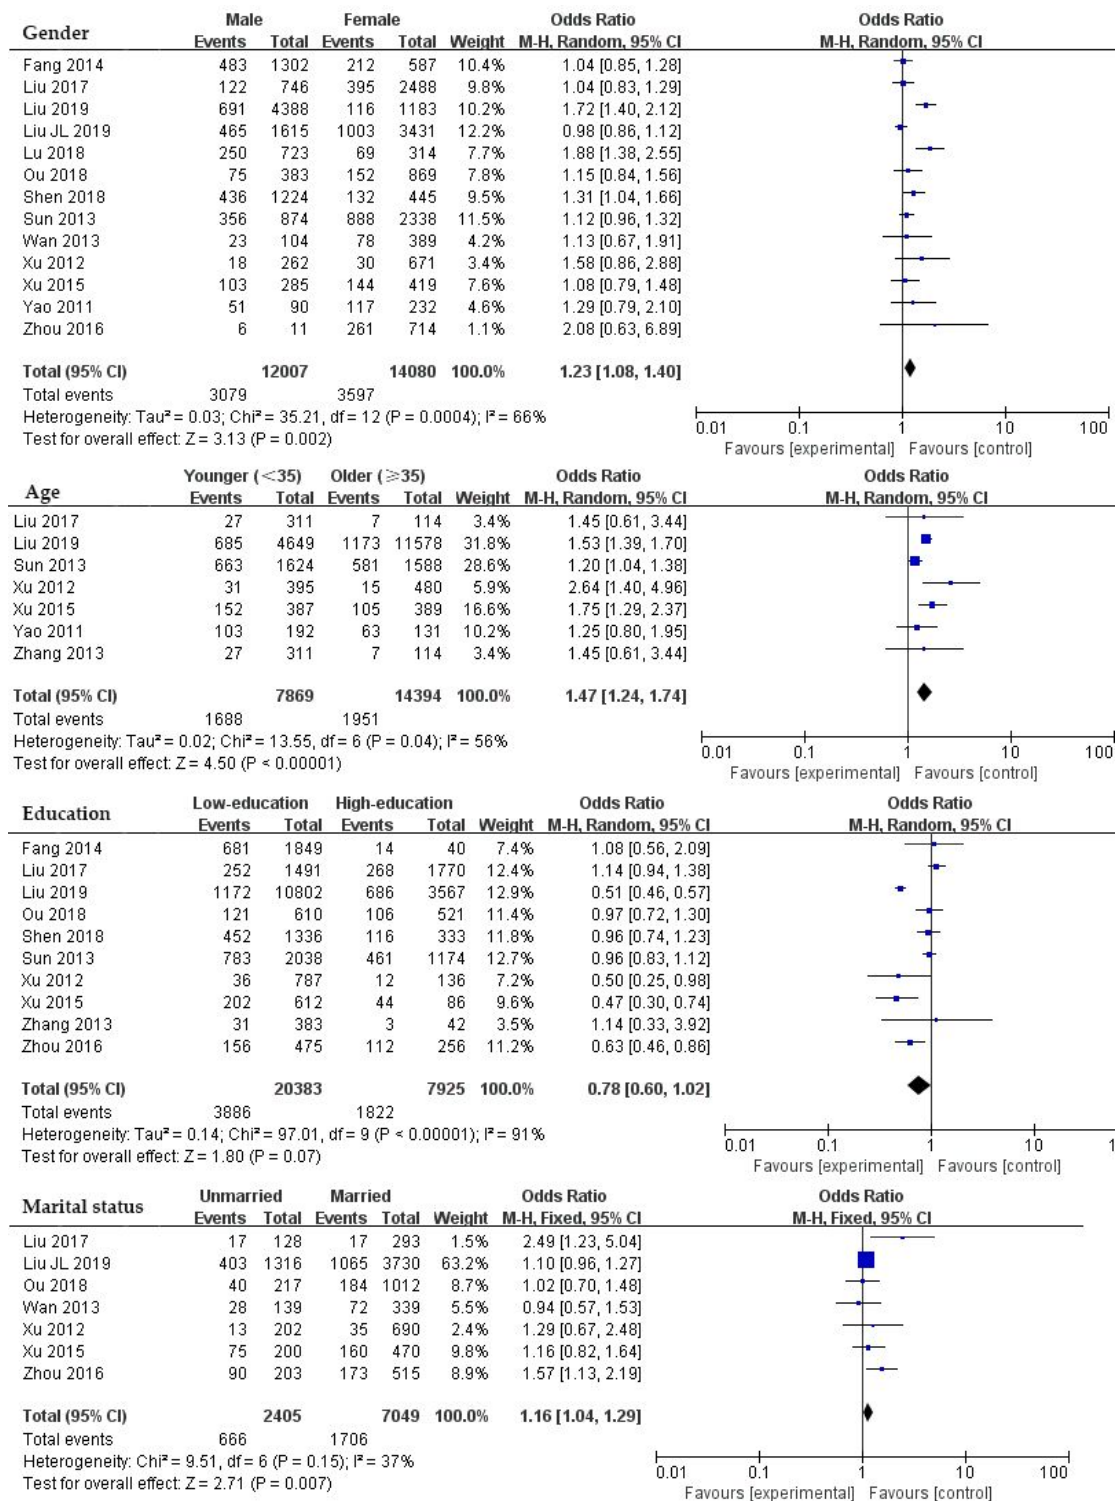

Figure 2 Forest plots of demographic factors

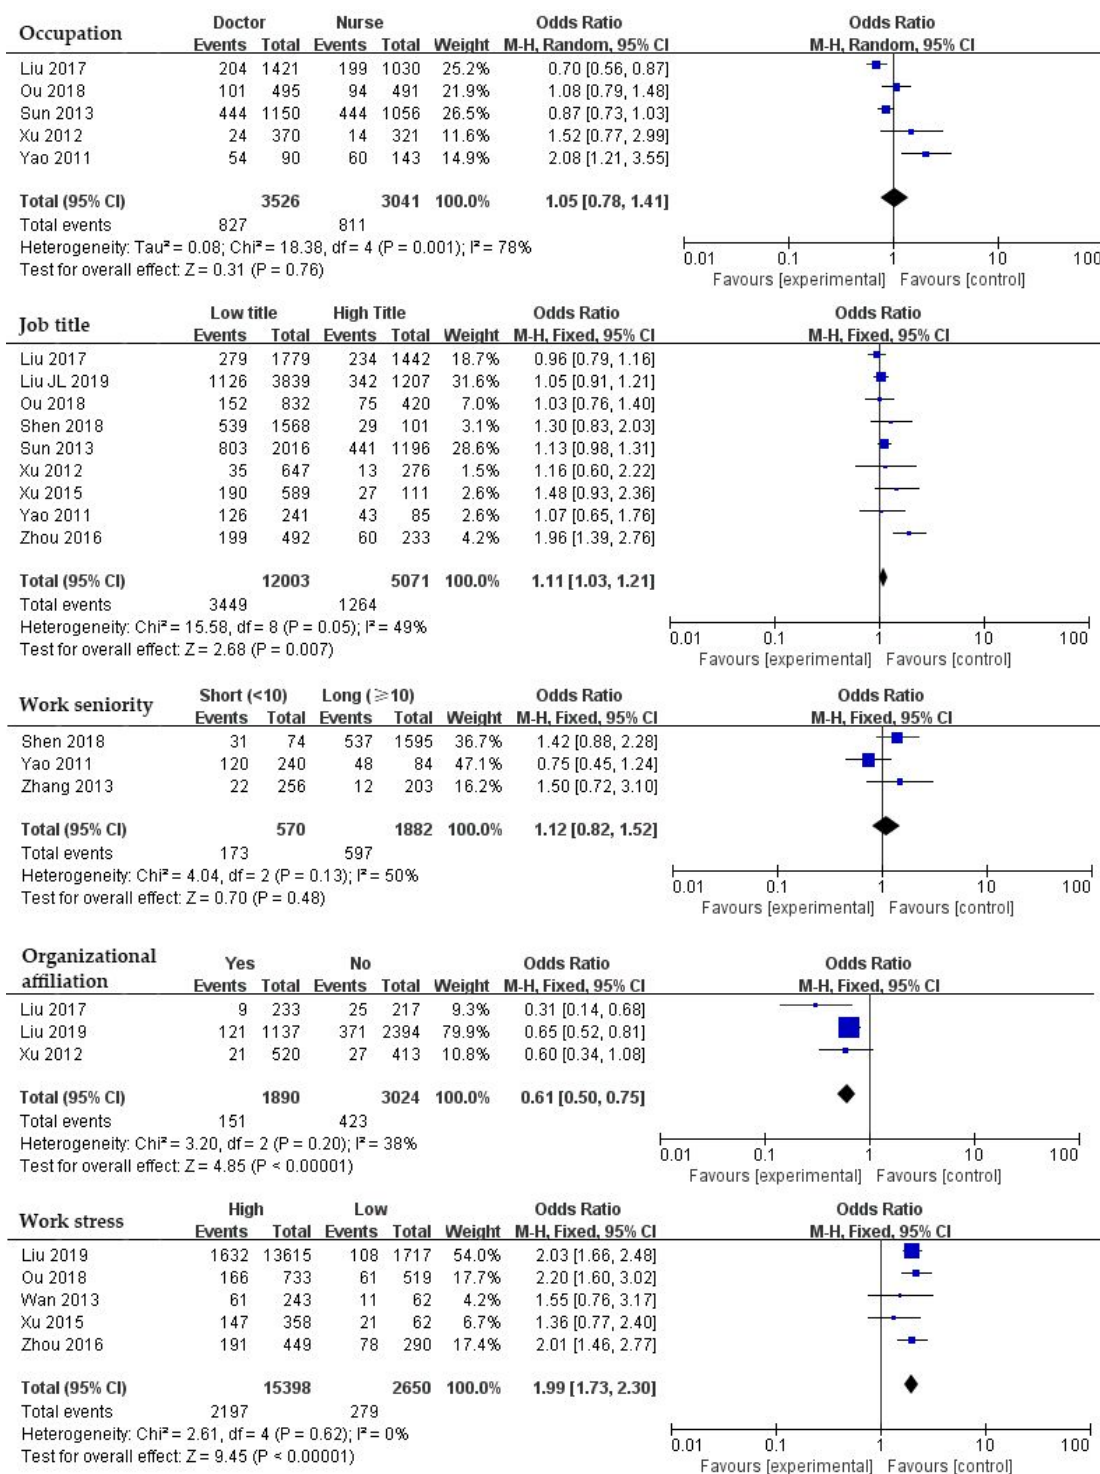

Figure 3 Forest plots of job characteristic factors

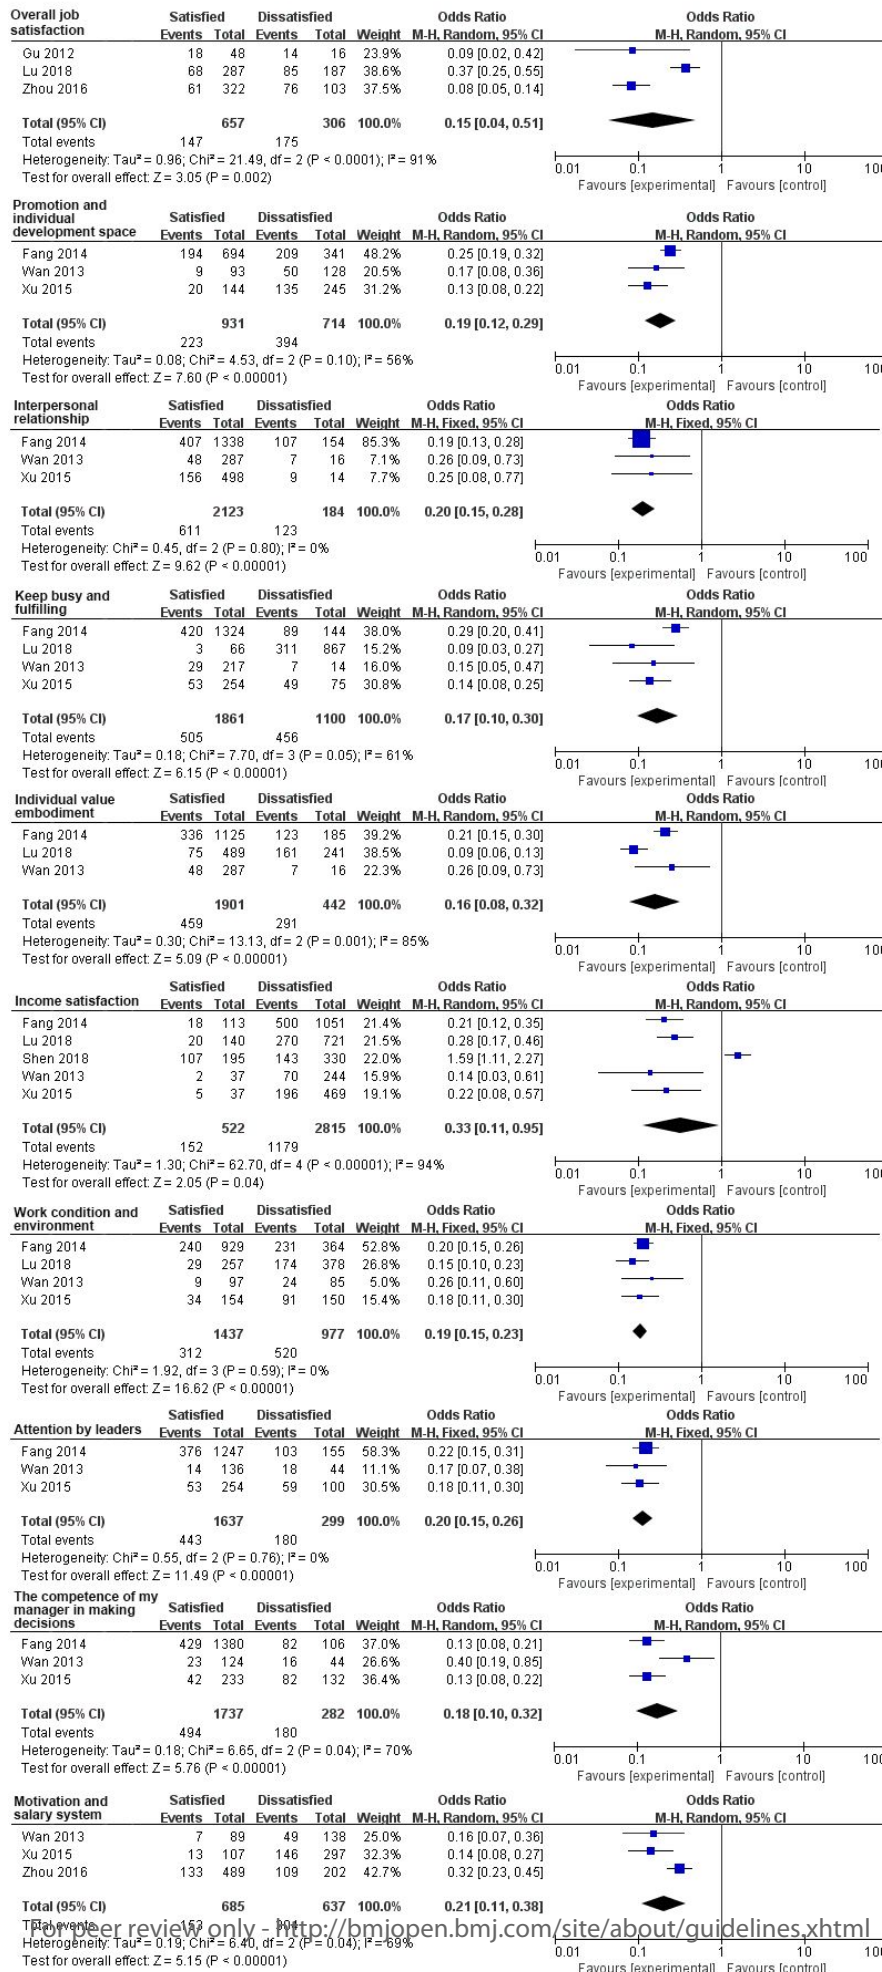

Figure 4 Forest plots of job satisfaction factors

For peer review only



**Table S1 Search strategy****Database 1: PubMed**

| Sequence | Query                                                                                                                                                                                                                                                                                                                                                                                                                                                                                                                                                                                                                                                                                                                                                      |
|----------|------------------------------------------------------------------------------------------------------------------------------------------------------------------------------------------------------------------------------------------------------------------------------------------------------------------------------------------------------------------------------------------------------------------------------------------------------------------------------------------------------------------------------------------------------------------------------------------------------------------------------------------------------------------------------------------------------------------------------------------------------------|
| #1       | Search (Chinese[MeSH Terms]) OR Chinese[Title/Abstract]                                                                                                                                                                                                                                                                                                                                                                                                                                                                                                                                                                                                                                                                                                    |
| #2       | Search (China[MeSH Terms]) OR China[Title/Abstract]                                                                                                                                                                                                                                                                                                                                                                                                                                                                                                                                                                                                                                                                                                        |
| #3       | <b>#1 OR #2</b><br>Search (((Chinese[MeSH Terms]) OR Chinese[Title/Abstract]))OR ((China[MeSH Terms]) OR China[Title/Abstract]))                                                                                                                                                                                                                                                                                                                                                                                                                                                                                                                                                                                                                           |
| #4       | Search (Health worker[MeSH Terms]) OR Health worker[Title/Abstract]                                                                                                                                                                                                                                                                                                                                                                                                                                                                                                                                                                                                                                                                                        |
| #5       | Search (Health officer[MeSH Terms]) OR Health officer[Title/Abstract]                                                                                                                                                                                                                                                                                                                                                                                                                                                                                                                                                                                                                                                                                      |
| #6       | Search (Health Manpower[MeSH Terms]) OR Health Manpower[Title/Abstract]                                                                                                                                                                                                                                                                                                                                                                                                                                                                                                                                                                                                                                                                                    |
| #7       | Search (Health Personnel[MeSH Terms]) OR Health Personnel[Title/Abstract]                                                                                                                                                                                                                                                                                                                                                                                                                                                                                                                                                                                                                                                                                  |
| #8       | Search (Medical Personnel[MeSH Terms]) OR Medical Personnel[Title/Abstract]                                                                                                                                                                                                                                                                                                                                                                                                                                                                                                                                                                                                                                                                                |
| #9       | Search (Medical worker[MeSH Terms]) OR Medical worker[Title/Abstract]                                                                                                                                                                                                                                                                                                                                                                                                                                                                                                                                                                                                                                                                                      |
| #10      | Search (Medical staff[MeSH Terms]) OR Medical staff[Title/Abstract]                                                                                                                                                                                                                                                                                                                                                                                                                                                                                                                                                                                                                                                                                        |
| #11      | Search (Doctor[MeSH Terms]) OR Doctor[Title/Abstract]                                                                                                                                                                                                                                                                                                                                                                                                                                                                                                                                                                                                                                                                                                      |
| #12      | Search (Physician[MeSH Terms]) OR Physician[Title/Abstract]                                                                                                                                                                                                                                                                                                                                                                                                                                                                                                                                                                                                                                                                                                |
| #13      | Search (Nurse[MeSH Terms]) OR Nurse [Title/Abstract]                                                                                                                                                                                                                                                                                                                                                                                                                                                                                                                                                                                                                                                                                                       |
| #14      | <b>#4 OR #5 OR #6 OR #7 OR #8 OR #9 OR #11 OR #12 OR #13</b><br>Search ((((((((((Health worker[MeSH Terms]) OR Health worker[Title/Abstract])) OR ((Health officer[MeSH Terms]) OR Health officer[Title/Abstract])) OR ((Health Manpower[MeSH Terms]) OR Health Manpower[Title/Abstract])) OR ((Health Personnel[MeSH Terms]) OR Health Personnel[Title/Abstract])) OR ((Medical Personnel[MeSH Terms]) OR Medical Personnel[Title/Abstract])) OR ((Medical worker[MeSH Terms]) OR Medical worker[Title/Abstract])) OR ((Medical staff[MeSH Terms]) OR Medical staff[Title/Abstract])) OR ((Doctor[MeSH Terms]) OR Doctor[Title/Abstract])) OR ((Physician[MeSH Terms]) OR Physician[Title/Abstract])) OR ((Nurse[MeSH Terms]) OR Nurse [Title/Abstract])) |
| #15      | Search (Rural[MeSH Terms]) OR Rural[Title/Abstract]                                                                                                                                                                                                                                                                                                                                                                                                                                                                                                                                                                                                                                                                                                        |
| #16      | Search (Countryside[MeSH Terms]) OR Countryside[Title/Abstract]                                                                                                                                                                                                                                                                                                                                                                                                                                                                                                                                                                                                                                                                                            |
| #17      | Search (Community[MeSH Terms]) OR Community[Title/Abstract]                                                                                                                                                                                                                                                                                                                                                                                                                                                                                                                                                                                                                                                                                                |
| #18      | Search (District[MeSH Terms]) OR District[Title/Abstract]                                                                                                                                                                                                                                                                                                                                                                                                                                                                                                                                                                                                                                                                                                  |
| #19      | Search (Basic[MeSH Terms]) OR Basic[Title/Abstract]                                                                                                                                                                                                                                                                                                                                                                                                                                                                                                                                                                                                                                                                                                        |
| #20      | Search (Fundamental[MeSH Terms]) OR Fundamental[Title/Abstract]                                                                                                                                                                                                                                                                                                                                                                                                                                                                                                                                                                                                                                                                                            |
| #21      | Search (Primary[MeSH Terms]) OR Primary[Title/Abstract]                                                                                                                                                                                                                                                                                                                                                                                                                                                                                                                                                                                                                                                                                                    |
| #22      | Search (Grass roots[MeSH Terms]) OR Grass roots[Title/Abstract]                                                                                                                                                                                                                                                                                                                                                                                                                                                                                                                                                                                                                                                                                            |
| #23      | <b>#7 OR #8 OR #9 OR #11 OR #12 OR #13 OR #14</b><br>Search (((Primary[MeSH Terms]) OR Primary[Title/Abstract]) OR Grass roots[MeSH Terms]) OR Grass roots[Title/Abstract]) OR (((Community[MeSH Terms]) OR Community[Title/Abstract]) OR ((((((((((Rural[MeSH Terms]) OR Rural[Title/Abstract]) OR Countryside[MeSH Terms]) OR Countryside[Title/Abstract]) OR District[MeSH Terms]) OR District[Title/Abstract]) OR Basic[MeSH Terms]) OR Basic[Title/Abstract]) OR Fundamental[MeSH Terms]) OR Fundamental[Title/Abstract]))                                                                                                                                                                                                                            |

|     |                                                                                                                                                                                                                                                                                                                                                                                                                                                                                                                                                                                                                                                                                                                                                                                                                                                                                                                                                                                                                                                                                                                                                                                                                                                                                                                                                                                                                                                                                                                                                                                                                                                                                        |
|-----|----------------------------------------------------------------------------------------------------------------------------------------------------------------------------------------------------------------------------------------------------------------------------------------------------------------------------------------------------------------------------------------------------------------------------------------------------------------------------------------------------------------------------------------------------------------------------------------------------------------------------------------------------------------------------------------------------------------------------------------------------------------------------------------------------------------------------------------------------------------------------------------------------------------------------------------------------------------------------------------------------------------------------------------------------------------------------------------------------------------------------------------------------------------------------------------------------------------------------------------------------------------------------------------------------------------------------------------------------------------------------------------------------------------------------------------------------------------------------------------------------------------------------------------------------------------------------------------------------------------------------------------------------------------------------------------|
| #24 | Search(Turnover Intention[MeSH Terms]) OR Turnover Intention[Title/Abstract]                                                                                                                                                                                                                                                                                                                                                                                                                                                                                                                                                                                                                                                                                                                                                                                                                                                                                                                                                                                                                                                                                                                                                                                                                                                                                                                                                                                                                                                                                                                                                                                                           |
| #25 | Search (Departure Intention[MeSH Terms]) OR Departure Intention[Title/Abstract]                                                                                                                                                                                                                                                                                                                                                                                                                                                                                                                                                                                                                                                                                                                                                                                                                                                                                                                                                                                                                                                                                                                                                                                                                                                                                                                                                                                                                                                                                                                                                                                                        |
| #26 | Search (Demission Intention[MeSH Terms]) OR Demission Intention[Title/Abstract]                                                                                                                                                                                                                                                                                                                                                                                                                                                                                                                                                                                                                                                                                                                                                                                                                                                                                                                                                                                                                                                                                                                                                                                                                                                                                                                                                                                                                                                                                                                                                                                                        |
| #27 | Search(Leave Intention[MeSH Terms]) OR Leave Intention[Title/Abstract]                                                                                                                                                                                                                                                                                                                                                                                                                                                                                                                                                                                                                                                                                                                                                                                                                                                                                                                                                                                                                                                                                                                                                                                                                                                                                                                                                                                                                                                                                                                                                                                                                 |
| #28 | Search intent to leave[Title/Abstract]                                                                                                                                                                                                                                                                                                                                                                                                                                                                                                                                                                                                                                                                                                                                                                                                                                                                                                                                                                                                                                                                                                                                                                                                                                                                                                                                                                                                                                                                                                                                                                                                                                                 |
| #29 | <b>#18 OR #19 OR #20</b><br>Search ((((((Turnover Intention[MeSH Terms]) OR Turnover Intention[Title/Abstract])) OR ((Departure Intention[MeSH Terms]) OR Departure Intention[Title/Abstract])) OR ((Demission Intention[MeSH Terms]) OR Demission Intention[Title/Abstract])) OR ((Leave Intention[MeSH Terms]) OR Leave Intention[Title/Abstract])) OR intent to leave[Title/Abstract]                                                                                                                                                                                                                                                                                                                                                                                                                                                                                                                                                                                                                                                                                                                                                                                                                                                                                                                                                                                                                                                                                                                                                                                                                                                                                               |
| #30 | <b>#3 AND #10AND #17AND #21</b><br>Search ((((((((((Turnover Intention[MeSH Terms]) OR Turnover Intention[Title/Abstract])) OR ((Departure Intention[MeSH Terms]) OR Departure Intention[Title/Abstract])) OR ((Demission Intention[MeSH Terms]) OR Demission Intention[Title/Abstract])) OR ((Leave Intention[MeSH Terms]) OR Leave Intention[Title/Abstract])) OR intent to leave[Title/Abstract])) AND (((((((Primary[MeSH Terms]) OR Primary[Title/Abstract]) OR Grass roots[MeSH Terms]) OR Grass roots[Title/Abstract]) OR (((Community[MeSH Terms]) OR Community[Title/Abstract]) OR (((((((Rural[MeSH Terms]) OR Rural[Title/Abstract]) OR Countryside[MeSH Terms]) OR Countryside[Title/Abstract]) OR District[MeSH Terms]) OR District[Title/Abstract]) OR Basic[MeSH Terms]) OR Basic[Title/Abstract]) OR fundamental[MeSH Terms]) OR fundamental[Title/Abstract])))) AND (((((((((((Health worker[MeSH Terms]) OR Health worker[Title/Abstract]) OR ((Health officer[MeSH Terms]) OR Health worker[Title/Abstract]) OR ((Health Manpower[MeSH Terms]) OR Health Manpower[Title/Abstract]) OR ((Health Personnel[MeSH Terms]) OR Health Personnel[Title/Abstract]) OR ((Medical Personnel[MeSH Terms]) OR Medical Personnel[Title/Abstract]) OR ((Medical worker[MeSH Terms]) OR Medical worker[Title/Abstract]) OR ((Medical staff[MeSH Terms]) OR Medical staff[Title/Abstract]) OR ((Doctor[MeSH Terms]) OR Doctor[Title/Abstract]) OR ((Physician[MeSH Terms]) OR Physician[Title/Abstract]) OR ((Nurse[MeSH Terms]) OR Nurse [Title/Abstract])))) AND ((((((Chinese[MeSH Terms]) OR Chinese[Title/Abstract])) OR ((China[MeSH Terms]) OR China[Title/Abstract])))))))) |

**Database 2: EMBASE**

| Sequence | Query                                                                                                                                                                                    |
|----------|------------------------------------------------------------------------------------------------------------------------------------------------------------------------------------------|
| #1       | 'China'/exp                                                                                                                                                                              |
| #2       | 'China':ti,ab                                                                                                                                                                            |
| #3       | #1 OR #2                                                                                                                                                                                 |
| #4       | 'Turnover Intention' OR 'Departure Intention' OR 'Demission Intention' OR 'Leave Intention'/exp                                                                                          |
| #5       | 'Turnover Intention' OR 'Departure Intention' OR 'Demission Intention' OR 'Leave Intention' OR 'intent to leave':ti,ab                                                                   |
| #6       | #4 OR #5                                                                                                                                                                                 |
| #7       | 'Primary' OR 'Grass roots' OR 'Community' OR 'Countryside' OR 'District' OR 'Basic' OR 'Rural' OR 'Fundamental':ti,ab                                                                    |
| #8       | 'Health worker' OR 'Health officer' OR 'Health Manpower' OR 'Health Personnel' OR 'Medical Personnel' OR 'Medical worker' OR 'Medical staff' OR 'Doctor' OR 'Physician' OR 'Nurse':ti,ab |

|    |                         |
|----|-------------------------|
| #9 | #3 AND #6 AND #7 AND #8 |
|----|-------------------------|

### Database 3: Cochrane Library

| Sequence | Query                                                                                                                                                                                             |
|----------|---------------------------------------------------------------------------------------------------------------------------------------------------------------------------------------------------|
| #1       | china:ti,ab,kw (Word variations have been searched)                                                                                                                                               |
| #2       | chinese:ti,ab,kw(Word variations have been searched)                                                                                                                                              |
| #3       | #1 or #2                                                                                                                                                                                          |
| #4       | (turnover intention):ti,ab,kw OR (departure Intention):ti,ab,kw OR (demission Intention):ti,ab,kw OR (leave Intention):ti,ab,kw OR (intent to leave):ti,ab,kw(Word variations have been searched) |
| #5       | (primary):ti,ab,kw OR (community):ti,ab,kw OR (rural):ti,ab,kw OR (basic):ti,ab,kw OR (countryside):ti,ab,kw(Word variations have been searched)                                                  |
| #6       | (health worker):ti,ab,kw OR (health manpower):ti,ab,kw OR (health personnel):ti,ab,kw OR (health officer):ti,ab,kw(Word variations have been searched)                                            |
| #7       | (medical worker):ti,ab,kw OR (medical staff):ti,ab,kw OR (doctor):ti,ab,kw OR (physician):ti,ab,kw OR (nurse):ti,ab,kw(Word variations have been searched)                                        |
| #8       | #5 or #6                                                                                                                                                                                          |
| #9       | #3 and #4 and #5 and #8                                                                                                                                                                           |

### Database 4: PsycINFO

| Sequence | Query                                                                                                                                                                                                                                                                                                                                                                                                                                                                                                      |
|----------|------------------------------------------------------------------------------------------------------------------------------------------------------------------------------------------------------------------------------------------------------------------------------------------------------------------------------------------------------------------------------------------------------------------------------------------------------------------------------------------------------------|
| #1       | Title: china OR Abstract: china OR Title: chinese OR Abstract: chinese                                                                                                                                                                                                                                                                                                                                                                                                                                     |
| #2       | Title: turnover intention OR Abstract: turnover intention OR Title: Departure Intention OR Abstract: Departure Intention OR Title: Demission Intention OR Abstract: Demission Intention OR Title: Leave Intention OR Abstract: Leave Intention OR Abstract: intent to leave                                                                                                                                                                                                                                |
| #3       | Title: Health worker OR Abstract: Health worker OR Title: Health officer OR Abstract: Health officer OR Title: Health Manpower OR Abstract: Health Manpower OR Title: Health Personnel OR Abstract: Health Personnel OR Title: Medical Personnel OR Abstract: Medical Personnel OR Title: Medical worker OR Abstract: Medical worker OR Title: Medical staff OR Abstract: Medical staff OR Title: Doctor OR Abstract: Doctor OR Title: Physician OR Abstract: Physician OR Title: Nurse OR Abstract: Nurse |
| #4       | Title: Rural OR Abstract: Rural OR Title: Countryside OR Abstract: Countryside OR Title: Community OR Abstract: Community OR Title: District OR Abstract: District OR Title: Basic OR Abstract: Basic OR Title: Fundamental OR Abstract: Fundamental OR Title: Primary OR Abstract: Primary OR Title: Grass roots OR Abstract: Grass roots                                                                                                                                                                 |
| #5       | #1 AND #2 AND #3 AND #4                                                                                                                                                                                                                                                                                                                                                                                                                                                                                    |

### Database 5: CAJD (CNKI)

SU=('医生'+ '医务人员'+ '护士'+ '卫生人员')AND SU=('离职意愿'+ '离职倾向'+ '离职意向'+ '留职意愿'+ '工作意愿'+ '留职意向')AND SU=('基层'+ '社区'+ '农村'+ '乡镇卫生院'+ '卫生服务中心')

### Database 6: CSPD (WANFANG Data)

(题名或关键词:(社区)+题名或关键词:(农村)+题名或关键词:(基层) +题名或关键词:(乡镇卫生院) +题名或关键词:(卫生服务中心))\* (题名或关键词:(离职意愿)+题名或关键词:(离职倾向)+题名或关键词:(离职意向) +题名或关键词:(留职意愿) +题名或关键词:(工作意愿) +题名或关键词:(留职意向) ) \*(题名或关键词:(医生)+题名或关键词:(护士)+题名或关键词:(医务人员) +题名或关键词:(卫生人员))

**Database 7: CBM**

((("社区"[标题:智能]) OR "基层"[标题:智能]) OR "农村"[标题:智能]) OR "乡镇卫生院"[标题:智能]) OR "卫生服务中心"[标题:智能]) AND (((("离职意愿"[标题:智能]) OR "离职倾向"[标题:智能]) OR "离职意向"[标题:智能]) OR "留职意愿"[标题:智能]) OR "工作意愿"[标题:智能]) OR "留职意向"[标题:智能]) AND (((("医生"[标题:智能]) OR "护士"[标题:智能]) OR "卫生人员"[标题:智能]) OR "医务人员"[标题:智能])

For peer review only

1  
2  
3  
4  
5  
6  
7  
8  
9  
10  
11  
12  
13  
14  
15  
16  
17  
18  
19  
20  
21  
22  
23  
24  
25  
26  
27  
28  
29  
30  
31  
32  
33  
34  
35  
36  
37  
38  
39  
40  
41  
42  
43  
44  
45  
46

**Table S2 47 factors related to TI**

| Group | Category           | Exposure                                                                                                                                                                                                                                                                                                                                                                                                                                                                                                                                                                                                                                    |
|-------|--------------------|---------------------------------------------------------------------------------------------------------------------------------------------------------------------------------------------------------------------------------------------------------------------------------------------------------------------------------------------------------------------------------------------------------------------------------------------------------------------------------------------------------------------------------------------------------------------------------------------------------------------------------------------|
| A     | Demographic        | A1-gender, A2-age, A3-education, A4-region, A5-marital status, A6-nation, A7-major,                                                                                                                                                                                                                                                                                                                                                                                                                                                                                                                                                         |
| B     | Job characteristic | B1-occupation, B2-job title, B3-work seniority, B4-qualified to practice, B5-income, B6-medical institution, B7-organizational affiliation, B8- re-employ after retirement, B9-turnover experience, B10-individual income levels in the local, B11-work stress, B12-emotional exhaustion, B13-flattening of affect, B14-public health service, B15-working hours, B16-career planning, B17-career identity, B18-Social status B19-influence family life, B20-living condition, B21-lack of insurance, B22-patient trust.                                                                                                                    |
| C     | Job satisfaction   | C1-learning and training opportunities, C2-promotion and individual development space, C3-interpersonal relationship, C4-work conditions and environment, C5-individual value embodiment, C6-scientific research atmosphere, C7-level of attention by leaders, C8-income satisfaction , C9-keep busy and fulfilling, C10-the competence of my manager in making decisions, C11-work stability, C12-policies practice, C13-the chance to try my own methods of doing the job, C14-the chance to do something that makes use of my abilities, C15-job satisfaction, C16-work support, C17-income fairness, C18-motivation and salary system . |

**Table S3 Quality scores assessing risk of bias using a modified Newcastle-Ottawa scale**

Study type: Cross-sectional; Score: 1=achieved, 0=not achieved

| Authors     | Representativeness of the sample | Sample size | Non-respondents | Ascertainment of the exposure | Comparability of subjects in different outcome groups (control for confounding) | Assessment of the outcome | Statistical test is appropriate | Total score |
|-------------|----------------------------------|-------------|-----------------|-------------------------------|---------------------------------------------------------------------------------|---------------------------|---------------------------------|-------------|
| Xu,2012     | 1                                | 1           | 0               | 1                             | 1                                                                               | 1                         | 1                               | 6           |
| Gu,2012     | 0                                | 1           | 0               | 1                             | 1                                                                               | 1                         | 1                               | 5           |
| Yao,2011    | 0                                | 1           | 0               | 1                             | 0                                                                               | 1                         | 1                               | 4           |
| Lu,2018     | 1                                | 1           | 0               | 1                             | 0                                                                               | 1                         | 1                               | 5           |
| Ou,2018     | 1                                | 1           | 0               | 1                             | 1                                                                               | 1                         | 1                               | 6           |
| Xu,2015     | 0                                | 1           | 0               | 1                             | 1                                                                               | 1                         | 1                               | 5           |
| Liu,2019    | 1                                | 1           | 0               | 1                             | 1                                                                               | 1                         | 1                               | 6           |
| Zhang,2013  | 0                                | 1           | 0               | 1                             | 1                                                                               | 1                         | 1                               | 5           |
| Liu,2017    | 1                                | 1           | 0               | 1                             | 0                                                                               | 1                         | 1                               | 5           |
| Shen,2018   | 1                                | 1           | 0               | 1                             | 1                                                                               | 1                         | 1                               | 6           |
| Zhou,2016   | 0                                | 1           | 0               | 1                             | 0                                                                               | 1                         | 1                               | 4           |
| Zhang,2015  | 0                                | 1           | 0               | 1                             | 1                                                                               | 1                         | 1                               | 5           |
| Wan,2013    | 0                                | 1           | 0               | 1                             | 0                                                                               | 1                         | 1                               | 4           |
| Fang,2014   | 1                                | 1           | 0               | 1                             | 1                                                                               | 1                         | 1                               | 6           |
| Sun,2013    | 1                                | 1           | 0               | 1                             | 1                                                                               | 1                         | 1                               | 6           |
| Liu JL,2019 | 1                                | 1           | 0               | 1                             | 1                                                                               | 1                         | 1                               | 6           |

Table S4 Meta-analyses on 19 factors

| Exposure                                      | No. of studies in<br>Meta-analyses | Comparison model                                                                           | Q test         |           | Statistical<br>model | Pooled OR<br>OR (95%CI) | Z test<br>P-value | Egger<br>P> t |
|-----------------------------------------------|------------------------------------|--------------------------------------------------------------------------------------------|----------------|-----------|----------------------|-------------------------|-------------------|---------------|
|                                               |                                    |                                                                                            | I <sup>2</sup> | P-value   |                      |                         |                   |               |
| <b>Demographic factors</b>                    |                                    |                                                                                            |                |           |                      |                         |                   |               |
| Gender                                        | 13                                 | Male vs. female                                                                            | 66%            | 0.0004    | Random-effect        | 1.23 [1.08, 1.40]       | 0.002             | 0.240         |
| Age                                           | 7                                  | Younger (<35) vs. older (≥35)                                                              | 56%            | 0.04      | Random-effect        | 1.47 [1.24, 1.74]       | < 0.00001         | 0.368         |
| Education                                     | 10                                 | Low-education (junior college or below)<br>vs. high-education(bachelor degree or<br>above) | 91%            | < 0.00001 | Random-effect        | 0.78 [0.60,1.02]        | 0.07              | 0.325         |
| Marital status                                | 7                                  | Unmarried vs. married                                                                      | 37%            | 0.15      | Fixed-effect         | 1.16 [1.04, 1.29]       | 0.007             | 0.095         |
| <b>Job characteristic factors</b>             |                                    |                                                                                            |                |           |                      |                         |                   |               |
| Occupation                                    | 5                                  | Doctor vs. nurse                                                                           | 78%            | 0.001     | Random-effect        | 1.05 [0.78, 1.41]       | 0.76              | 0.221         |
| Job title                                     | 9                                  | Low-title (no title or junior title) vs. high-<br>title (middle title or senior title)     | 49%            | 0.05      | Fixed-effect         | 1.11 [1.03, 1.21]       | 0.007             | 0.223         |
| Work seniority                                | 3                                  | Short (<10) vs. long (≥10)                                                                 | 50%            | 0.13      | Fixed-effect         | 1.12 [1.82, 1.52]       | 0.48              | 0.117         |
| Organizational affiliation                    | 4                                  | Authorized personnel vs. others                                                            | 38%            | 0.20      | Fixed-effect         | 0.85 [0.73, 1.00]       | < 0.00001         | 0.400         |
| Work stress                                   | 5                                  | High vs. low                                                                               | 0%             | 0.62      | Fixed-effect         | 3.14 [2.73, 3.61]       | < 0.00001         | 0.169         |
| <b>Job satisfaction factors</b>               |                                    |                                                                                            |                |           |                      |                         |                   |               |
| Overall job satisfaction                      | 3                                  | Satisfied vs. dissatisfied                                                                 | 91%            | < 0.0001  | Random-effect        | 0.15 [0.04, 0.51]       | 0.002             | 0.561         |
| Promotion and individual<br>development space | 3                                  | Satisfied vs. dissatisfied                                                                 | 56%            | 0.10      | Random-effect        | 0.19 [0.12, 0.29]       | < 0.00001         | 0.160         |
| Interpersonal relationship                    | 3                                  | Satisfied vs. dissatisfied                                                                 | 0%             | 0.80      | Fixed-effect         | 0.20 [0.15, 0.28]       | < 0.00001         | 0.522         |
| Keep busy and fulfilling                      | 4                                  | Satisfied vs. dissatisfied                                                                 | 61%            | 0.05      | Random-effect        | 0.39 [0.33, 0.47]       | < 0.00001         | 0.162         |
| Individual value embodiment                   | 3                                  | Satisfied vs. dissatisfied                                                                 | 85%            | 0.001     | Random-effect        | 0.16 [0.08, 0.32]       | < 0.00001         | 0.291         |

|    |                                 |   |                            |     |           |               |                   |           |       |
|----|---------------------------------|---|----------------------------|-----|-----------|---------------|-------------------|-----------|-------|
| 1  |                                 |   |                            |     |           |               |                   |           |       |
| 2  |                                 |   |                            |     |           |               |                   |           |       |
| 3  |                                 |   |                            |     |           |               |                   |           |       |
| 4  |                                 |   |                            |     |           |               |                   |           |       |
| 5  | Income satisfaction             | 5 | Satisfied vs. dissatisfied | 94% | < 0.00001 | Random-effect | 0.33 [0.11, 0.95] | 0.04      | 0.216 |
| 6  | Work condition and environment  | 5 | Satisfied vs. dissatisfied | 0%  | 0.59      | Fixed-effect  | 0.19 [0.15, 0.23] | < 0.00001 | 0.153 |
| 7  | Attention by leaders            | 3 | Satisfied vs. dissatisfied | 0%  | 0.76      | Fixed-effect  | 0.20 [0.15, 0.26] | < 0.00001 | 0.120 |
| 8  |                                 |   |                            |     |           |               |                   |           |       |
| 9  | The competence of my manager in |   |                            |     |           |               |                   |           |       |
| 10 | making decisions                | 3 | Satisfied vs. dissatisfied | 70% | 0.04      | Random-effect | 0.18 [0.10, 0.32] | < 0.00001 | 0.210 |
| 11 |                                 |   |                            |     |           |               |                   |           |       |
| 12 | Motivation and salary system    | 3 | Satisfied vs. dissatisfied | 69% | 0.04      | Random-effect | 0.21 [0.11, 0.38] | < 0.00001 | 0.161 |
| 13 |                                 |   |                            |     |           |               |                   |           |       |
| 14 |                                 |   |                            |     |           |               |                   |           |       |
| 15 |                                 |   |                            |     |           |               |                   |           |       |
| 16 |                                 |   |                            |     |           |               |                   |           |       |
| 17 |                                 |   |                            |     |           |               |                   |           |       |
| 18 |                                 |   |                            |     |           |               |                   |           |       |
| 19 |                                 |   |                            |     |           |               |                   |           |       |
| 20 |                                 |   |                            |     |           |               |                   |           |       |
| 21 |                                 |   |                            |     |           |               |                   |           |       |
| 22 |                                 |   |                            |     |           |               |                   |           |       |
| 23 |                                 |   |                            |     |           |               |                   |           |       |
| 24 |                                 |   |                            |     |           |               |                   |           |       |
| 25 |                                 |   |                            |     |           |               |                   |           |       |
| 26 |                                 |   |                            |     |           |               |                   |           |       |
| 27 |                                 |   |                            |     |           |               |                   |           |       |
| 28 |                                 |   |                            |     |           |               |                   |           |       |
| 29 |                                 |   |                            |     |           |               |                   |           |       |
| 30 |                                 |   |                            |     |           |               |                   |           |       |
| 31 |                                 |   |                            |     |           |               |                   |           |       |
| 32 |                                 |   |                            |     |           |               |                   |           |       |
| 33 |                                 |   |                            |     |           |               |                   |           |       |
| 34 |                                 |   |                            |     |           |               |                   |           |       |
| 35 |                                 |   |                            |     |           |               |                   |           |       |
| 36 |                                 |   |                            |     |           |               |                   |           |       |
| 37 |                                 |   |                            |     |           |               |                   |           |       |
| 38 |                                 |   |                            |     |           |               |                   |           |       |
| 39 |                                 |   |                            |     |           |               |                   |           |       |
| 40 |                                 |   |                            |     |           |               |                   |           |       |
| 41 |                                 |   |                            |     |           |               |                   |           |       |
| 42 |                                 |   |                            |     |           |               |                   |           |       |
| 43 |                                 |   |                            |     |           |               |                   |           |       |
| 44 |                                 |   |                            |     |           |               |                   |           |       |
| 45 |                                 |   |                            |     |           |               |                   |           |       |
| 46 |                                 |   |                            |     |           |               |                   |           |       |



1  
2  
3  
4  
5  
6  
7  
8  
9  
10  
11  
12  
13  
14  
15  
16  
17  
18  
19  
20  
21  
22  
23  
24  
25  
26  
27  
28  
29  
30  
31  
32  
33  
34  
35  
36  
37  
38  
39  
40  
41  
42  
43  
44  
45  
46  
47  
48  
49  
50  
51  
52  
53  
54  
55  
56  
57  
58  
59  
60

For peer review only

# Appendix

## 1. Distribution of factors in 16 included studies (1 = Yes, 0 = No)

| Exposure | 16 included studies (Ref. No.) |   |    |    |    |    |    |    |    |    |    |    |    |    |    |    | Total |
|----------|--------------------------------|---|----|----|----|----|----|----|----|----|----|----|----|----|----|----|-------|
|          | 5                              | 7 | 13 | 15 | 17 | 19 | 33 | 39 | 49 | 54 | 55 | 63 | 70 | 76 | 79 | 86 |       |
| A1       | 1                              | 0 | 1  | 1  | 1  | 1  | 1  | 0  | 1  | 1  | 1  | 0  | 1  | 1  | 1  | 1  | 13    |
| A2       | 1                              | 1 | 1  | 1  | 1  | 1  | 1  | 1  | 0  | 1  | 1  | 0  | 1  | 0  | 1  | 1  | 13    |
| A3       | 1                              | 0 | 1  | 0  | 1  | 1  | 1  | 1  | 1  | 1  | 1  | 0  | 1  | 1  | 1  | 1  | 13    |
| A4       | 0                              | 0 | 0  | 0  | 1  | 0  | 0  | 0  | 1  | 0  | 0  | 0  | 0  | 0  | 1  | 0  | 3     |
| A5       | 1                              | 0 | 0  | 0  | 1  | 1  | 0  | 1  | 0  | 0  | 1  | 0  | 1  | 0  | 0  | 1  | 7     |
| A6       | 0                              | 0 | 0  | 0  | 0  | 1  | 0  | 0  | 0  | 0  | 0  | 0  | 1  | 0  | 0  | 0  | 2     |
| A7       | 0                              | 0 | 0  | 0  | 0  | 0  | 0  | 0  | 0  | 1  | 0  | 0  | 1  | 0  | 0  | 0  | 2     |
| B1       | 1                              | 0 | 1  | 0  | 1  | 0  | 0  | 0  | 1  | 0  | 0  | 0  | 0  | 0  | 1  | 0  | 5     |
| B2       | 1                              | 0 | 1  | 0  | 1  | 1  | 1  | 0  | 1  | 1  | 1  | 0  | 1  | 0  | 1  | 1  | 11    |
| B3       | 1                              | 0 | 1  | 0  | 1  | 0  | 0  | 1  | 0  | 1  | 0  | 0  | 1  | 1  | 1  | 0  | 8     |
| B4       | 0                              | 0 | 0  | 0  | 0  | 0  | 0  | 0  | 0  | 0  | 0  | 0  | 0  | 1  | 0  | 0  | 1     |
| B5       | 0                              | 0 | 0  | 0  | 0  | 0  | 0  | 0  | 0  | 0  | 0  | 0  | 1  | 0  | 0  | 1  | 2     |
| B6       | 0                              | 0 | 1  | 0  | 0  | 0  | 0  | 0  | 0  | 0  | 0  | 0  | 1  | 0  | 0  | 1  | 3     |
| B7       | 1                              | 0 | 0  | 0  | 0  | 0  | 1  | 0  | 1  | 0  | 0  | 0  | 0  | 0  | 0  | 0  | 3     |
| B8       | 0                              | 0 | 1  | 0  | 0  | 0  | 0  | 0  | 0  | 0  | 0  | 0  | 0  | 0  | 0  | 0  | 1     |
| B9       | 0                              | 0 | 0  | 0  | 0  | 0  | 0  | 0  | 0  | 0  | 0  | 0  | 1  | 0  | 0  | 0  | 1     |
| B10      | 0                              | 0 | 0  | 1  | 0  | 0  | 0  | 0  | 0  | 0  | 0  | 0  | 0  | 1  | 0  | 0  | 2     |
| B11      | 0                              | 0 | 0  | 0  | 1  | 1  | 1  | 0  | 0  | 0  | 1  | 0  | 1  | 0  | 0  | 0  | 5     |
| B12      | 0                              | 0 | 0  | 0  | 0  | 0  | 0  | 0  | 0  | 1  | 0  | 0  | 0  | 0  | 0  | 0  | 1     |
| B13      | 0                              | 0 | 0  | 0  | 0  | 0  | 0  | 0  | 0  | 1  | 0  | 0  | 0  | 0  | 0  | 0  | 1     |
| B14      | 0                              | 0 | 0  | 0  | 0  | 0  | 0  | 0  | 0  | 0  | 1  | 1  | 0  | 0  | 0  | 0  | 2     |
| B15      | 0                              | 0 | 0  | 0  | 0  | 0  | 0  | 0  | 0  | 0  | 0  | 0  | 1  | 0  | 0  | 0  | 1     |
| B16      | 0                              | 0 | 0  | 0  | 0  | 0  | 0  | 0  | 0  | 0  | 0  | 0  | 1  | 0  | 0  | 0  | 1     |
| B17      | 0                              | 0 | 0  | 0  | 0  | 0  | 0  | 0  | 0  | 0  | 0  | 0  | 1  | 0  | 0  | 0  | 1     |
| B18      | 0                              | 0 | 0  | 1  | 0  | 1  | 0  | 0  | 0  | 0  | 0  | 0  | 1  | 0  | 0  | 0  | 3     |
| B19      | 0                              | 0 | 0  | 0  | 0  | 0  | 0  | 0  | 0  | 0  | 0  | 0  | 0  | 0  | 1  | 0  | 1     |
| B20      | 0                              | 0 | 0  | 0  | 0  | 1  | 0  | 0  | 0  | 0  | 0  | 0  | 1  | 0  | 0  | 0  | 2     |
| B21      | 0                              | 0 | 0  | 0  | 0  | 0  | 0  | 0  | 0  | 1  | 0  | 0  | 0  | 0  | 0  | 0  | 1     |
| B22      | 0                              | 0 | 0  | 0  | 0  | 0  | 0  | 0  | 0  | 0  | 0  | 0  | 1  | 0  | 0  | 0  | 1     |
| C1       | 0                              | 0 | 0  | 0  | 0  | 1  | 0  | 0  | 0  | 1  | 0  | 0  | 1  | 0  | 0  | 0  | 3     |
| C2       | 0                              | 0 | 0  | 0  | 0  | 1  | 0  | 0  | 0  | 0  | 0  | 0  | 1  | 1  | 0  | 0  | 3     |
| C3       | 0                              | 0 | 0  | 1  | 0  | 1  | 0  | 0  | 0  | 0  | 0  | 0  | 1  | 1  | 0  | 0  | 4     |
| C4       | 0                              | 0 | 0  | 1  | 0  | 1  | 0  | 0  | 0  | 0  | 1  | 0  | 1  | 1  | 0  | 0  | 5     |
| C5       | 0                              | 0 | 0  | 1  | 0  | 0  | 0  | 0  | 0  | 0  | 0  | 0  | 1  | 1  | 0  | 0  | 3     |
| C6       | 0                              | 0 | 0  | 0  | 0  | 0  | 0  | 0  | 0  | 0  | 0  | 0  | 0  | 0  | 1  | 0  | 1     |
| C7       | 0                              | 0 | 0  | 0  | 0  | 1  | 0  | 0  | 0  | 0  | 0  | 0  | 1  | 1  | 0  | 0  | 3     |
| C8       | 0                              | 0 | 0  | 1  | 0  | 1  | 0  | 0  | 0  | 1  | 0  | 0  | 1  | 1  | 0  | 0  | 5     |

1  
2  
3  
4  
5  
6  
7  
8  
9  
10  
11  
12  
13  
14  
15  
16  
17  
18  
19  
20  
21  
22  
23  
24  
25  
26  
27  
28  
29  
30  
31  
32  
33  
34  
35  
36  
37  
38  
39  
40  
41  
42  
43  
44  
45  
46  
47  
48  
49  
50  
51  
52  
53  
54  
55  
56  
57  
58  
59  
60

|              |          |          |          |           |          |           |          |          |          |           |           |          |           |           |          |          |          |
|--------------|----------|----------|----------|-----------|----------|-----------|----------|----------|----------|-----------|-----------|----------|-----------|-----------|----------|----------|----------|
| <b>C9</b>    | 0        | 0        | 0        | 1         | 0        | 1         | 0        | 0        | 0        | 0         | 0         | 0        | 1         | 1         | 0        | 0        | <b>4</b> |
| <b>C10</b>   | 0        | 0        | 0        | 0         | 0        | 1         | 0        | 0        | 0        | 0         | 0         | 0        | 1         | 1         | 0        | 0        | <b>3</b> |
| <b>C11</b>   | 0        | 0        | 0        | 0         | 0        | 0         | 0        | 0        | 0        | 0         | 0         | 0        | 1         | 1         | 0        | 0        | <b>2</b> |
| <b>C12</b>   | 0        | 0        | 0        | 0         | 0        | 0         | 0        | 0        | 0        | 0         | 1         | 0        | 1         | 1         | 0        | 0        | <b>3</b> |
| <b>C13</b>   | 0        | 0        | 0        | 0         | 0        | 0         | 0        | 0        | 0        | 0         | 0         | 0        | 0         | 1         | 0        | 0        | <b>1</b> |
| <b>C14</b>   | 0        | 0        | 0        | 0         | 0        | 0         | 0        | 0        | 0        | 0         | 0         | 0        | 1         | 1         | 0        | 0        | <b>2</b> |
| <b>C15</b>   | 0        | 1        | 0        | 1         | 0        | 0         | 0        | 0        | 0        | 0         | 1         | 0        | 0         | 0         | 0        | 0        | <b>3</b> |
| <b>C16</b>   | 0        | 0        | 0        | 1         | 0        | 1         | 0        | 0        | 0        | 0         | 0         | 0        | 0         | 0         | 0        | 0        | <b>2</b> |
| <b>C17</b>   | 0        | 0        | 0        | 0         | 0        | 0         | 0        | 0        | 0        | 0         | 1         | 0        | 1         | 0         | 0        | 0        | <b>2</b> |
| <b>C18</b>   | 0        | 0        | 0        | 0         | 0        | 1         | 0        | 0        | 0        | 0         | 1         | 0        | 1         | 0         | 0        | 0        | <b>3</b> |
| <b>Total</b> | <b>8</b> | <b>2</b> | <b>8</b> | <b>11</b> | <b>9</b> | <b>19</b> | <b>6</b> | <b>4</b> | <b>6</b> | <b>11</b> | <b>12</b> | <b>1</b> | <b>32</b> | <b>17</b> | <b>9</b> | <b>7</b> |          |

## 2. Data extraction according to each factor

\* *TI: Turnover Intention; Non-TI: Non- Turnover Intention*

### A1-Gender

| Author       | Group  | TI   | Non-TI | Results                                                 |
|--------------|--------|------|--------|---------------------------------------------------------|
| Sun, 2013    | male   | 356  | 518    | No significant difference ( $\chi^2$ test).             |
|              | female | 888  | 1450   |                                                         |
| Liu JL, 2019 | male   | 465  | 1150   | No significant difference ( $\chi^2$ test).             |
|              | female | 1003 | 2428   |                                                         |
| Fang, 2014   | male   | 483  | 819    | No significant difference ( $\chi^2$ test).             |
|              | female | 212  | 375    |                                                         |
| Xu, 2012     | male   | 18   | 244    | Significant difference ( $\chi^2=10.040$ , $P<0.01$ ).  |
|              | female | 30   | 641    |                                                         |
| Yao, 2011    | male   | 51   | 39     | No significant difference ( $\chi^2$ test).             |
|              | female | 115  | 117    |                                                         |
| Lu, 2018     | male   | 250  | 473    | Significant difference ( $\chi^2=18.574$ , $P<0.001$ ). |
|              | female | 69   | 245    |                                                         |
| Ou, 2018     | male   | 75   | 308    | No significant difference ( $\chi^2$ test).             |
|              | female | 152  | 717    |                                                         |
| Xu, 2015     | male   | 103  | 182    | No significant difference ( $\chi^2$ test).             |
|              | female | 144  | 275    |                                                         |
| Liu, 2019    | male   | 691  | 3697   | Significant difference ( $\chi^2=109.55$ , $P<0.001$ ). |
|              | female | 116  | 1067   |                                                         |
| Liu, 2017    | male   | 122  | 624    | No significant difference ( $\chi^2$ test).             |
|              | female | 395  | 2093   |                                                         |
| Shen, 2018   | male   | 436  | 788    | Significant difference ( $\chi^2=5.160$ , $P=0.023$ ).  |
|              | female | 132  | 313    |                                                         |
| Wan, 2013    | male   | 23   | 81     | No significant difference ( $\chi^2$ test).             |
|              | female | 78   | 311    |                                                         |
| Zhou, 2016   | male   | 6    | 5      | No significant difference ( $\chi^2$ test).             |
|              | female | 261  | 453    |                                                         |

### A2-Age

| Author       | Group | TI  | Non-TI | Results                                                                                                                           |
|--------------|-------|-----|--------|-----------------------------------------------------------------------------------------------------------------------------------|
| Sun, 2013    | ≤ 24  | 166 | 229    | Significant difference ( $\chi^2=11.73$ , $P=0.019$ );<br>25-34, OR=0.740, 95%CI=0.549-0.996;<br>≥55, OR=0.518, 95%CI=0.296-0.905 |
|              | 25-34 | 497 | 732    |                                                                                                                                   |
|              | 35-44 | 368 | 589    |                                                                                                                                   |
|              | 45-54 | 159 | 290    |                                                                                                                                   |
|              | ≥ 55  | 54  | 128    |                                                                                                                                   |
| Liu JL, 2019 | < 30  | 606 | 1318   | Significant difference ( $\chi^2$ test, $P<0.001$ );<br>< 30, OR=1.21, 95%CI=1.01-1.45;                                           |
|              | 31-40 | 534 | 1175   |                                                                                                                                   |

|                    |           |                  |                 |                                                     |
|--------------------|-----------|------------------|-----------------|-----------------------------------------------------|
|                    | $\geq 41$ | 328              | 1022            | 31-40, OR=1.29, 95%CI=1.08-1.54                     |
| <b>Xu, 2012</b>    | $\leq 25$ | 5                | 125             | Significant difference ( $\chi^2=25.786$ , P=0.001) |
|                    | 25-34     | 26               | 270             |                                                     |
|                    | 35-44     | 6                | 240             |                                                     |
|                    | 45-54     | 9                | 168             |                                                     |
|                    | $\geq 55$ | 2                | 72              |                                                     |
| <b>Xu, 2015</b>    | < 25      | 21               | 40              | No significant difference ( $\chi^2$ test)          |
|                    | 25-34     | 131              | 195             |                                                     |
|                    | 35-44     | 69               | 143             |                                                     |
|                    | $\geq 45$ | 21               | 63              |                                                     |
| <b>Zhang, 2013</b> | < 25      | 15               | 78              | Significant difference ( $\chi^2=10.553$ , P=0.032) |
|                    | 25-29     | 9                | 130             |                                                     |
|                    | 30-34     | 3                | 76              |                                                     |
|                    | 35-39     | 5                | 61              |                                                     |
|                    | $\geq 40$ | 2                | 46              |                                                     |
| <b>Gu, 2012</b>    | < 29      | 19               | 12              | Significant difference ( $\chi^2=10.177$ , P=0.017) |
|                    | 30-39     | 30               | 9               |                                                     |
|                    | 40-49     | 8                | 12              |                                                     |
|                    | > 50      | 15               | 17              |                                                     |
| <b>Yao, 2011</b>   | < 25      | 37               | 32              | No significant difference ( $\chi^2$ test)          |
|                    | 25-34     | 66               | 57              |                                                     |
|                    | 35-44     | 37               | 43              |                                                     |
|                    | 45-55     | 19               | 16              |                                                     |
|                    | >55       | 7                | 9               |                                                     |
| <b>Lu, 2018</b>    | $\leq 30$ | 11               | 24              | Significant difference ( $\chi^2=9.298$ , P=0.026). |
|                    | 31-40     | 142              | 261             |                                                     |
|                    | 41-50     | 104              | 250             |                                                     |
|                    | 51-60     | 42               | 117             |                                                     |
|                    | >60       | 20               | 66              |                                                     |
| <b>Ou, 2018</b>    | Mean      | 34.69 $\pm$ 7.29 | 36.06 $\pm$ 8.0 | Significant difference ( $\chi^2=2.530$ , P=0.012). |
| <b>Liu, 2019</b>   | < 25      | 84               | 498             | Significant difference ( $\chi^2$ test , P<0.001)   |
|                    | 25-34     | 601              | 3466            |                                                     |
|                    | 35-44     | 606              | 4884            |                                                     |
|                    | 45-54     | 497              | 4857            |                                                     |
|                    | 55-59     | 55               | 587             |                                                     |
|                    | $\geq 60$ | 15               | 77              |                                                     |
| <b>Shen, 2018</b>  | 18-29     | 20               | 22              | Significant difference ( $\chi^2=13.724$ , P=0.017) |
|                    | 30-39     | 140              | 241             |                                                     |
|                    | 40-49     | 223              | 406             |                                                     |
|                    | 50-59     | 110              | 218             |                                                     |
|                    | 60-69     | 67               | 190             |                                                     |

|                  |       |     |     |                                                         |
|------------------|-------|-----|-----|---------------------------------------------------------|
|                  | ≥ 70  | 8   | 24  |                                                         |
| <b>Zhou,2016</b> | ≤ 28  | 143 | 179 | Significant difference ( $\chi^2=37.40$ , $P<0.01$ ).   |
|                  | 29-35 | 75  | 101 |                                                         |
|                  | ≥ 36  | 48  | 186 |                                                         |
| <b>Wan, 2013</b> | < 25  | 20  | 107 | Significant difference ( $\chi^2=9.433$ , $P=0.009$ ).  |
|                  | 25-44 | 76  | 234 |                                                         |
|                  | ≥ 45  | 5   | 51  |                                                         |
| <b>Liu, 2017</b> | < 25  | 15  | 78  | Significant difference ( $\chi^2=10.553$ , $P=0.032$ ). |
|                  | 25-29 | 9   | 130 |                                                         |
|                  | 30-34 | 3   | 76  |                                                         |
|                  | 35-39 | 5   | 61  |                                                         |
|                  | ≥40   | 2   | 46  |                                                         |

### A3-Education

| Author              | Group                                | TI   | Non-TI | Results                                               |
|---------------------|--------------------------------------|------|--------|-------------------------------------------------------|
| <b>Sun, 2013</b>    | Secondary technical school and below | 239  | 409    | No significant difference ( $\chi^2$ test)            |
|                     | Junior college                       | 544  | 846    |                                                       |
|                     | Bachelor                             | 445  | 698    |                                                       |
|                     | Master and above                     | 16   | 15     |                                                       |
| <b>Zhou, 2016</b>   | Secondary technical school and below | 22   | 60     | Significant difference ( $\chi^2=10.07$ , $P=0.01$ ). |
|                     | Junior college                       | 134  | 259    |                                                       |
|                     | Bachelor and above                   | 112  | 144    |                                                       |
| <b>Liu JL, 2019</b> | Low                                  | 16   | 68     | Significant difference ( $\chi^2$ test , $P=0.008$ ); |
|                     | Medium                               | 1021 | 2582   | Medium, OR=1.46, 95%CI=0.83-2.58;                     |
|                     | High                                 | 431  | 928    | High, OR=1.72, 95%CI=0.96-3.09                        |
| <b>Fang, 2014</b>   | Secondary technical school and below | 577  | 987    | No significant difference ( $\chi^2$ test)            |
|                     | Junior college                       | 104  | 181    |                                                       |
|                     | Bachelor                             | 8    | 13     |                                                       |
|                     | Master and above                     | 6    | 13     |                                                       |
| <b>Xu, 2012</b>     | Secondary technical school and below | 352  | 14     | Significant difference ( $\chi^2$ test , $P=0.052$ )  |
|                     | Junior college                       | 399  | 22     |                                                       |
|                     | Bachelor                             | 124  | 12     |                                                       |
| <b>Yao, 2011</b>    | Secondary technical school and below | 30   | 42     | Significant difference ( $\chi^2=3.767$ , $P=0.035$ ) |
|                     | Junior college and above             | 135  | 112    |                                                       |

|                    |                                               |     |      |                                                                                                                             |
|--------------------|-----------------------------------------------|-----|------|-----------------------------------------------------------------------------------------------------------------------------|
| <b>Ou, 2018</b>    | Secondary technical school and Junior college | 121 | 610  | No significant difference ( $\chi^2$ test)                                                                                  |
|                    | Bachelor                                      | 104 | 400  |                                                                                                                             |
|                    | Master and above                              | 2   | 15   |                                                                                                                             |
|                    |                                               |     |      |                                                                                                                             |
| <b>Zhang, 2013</b> | Secondary technical school and below          | 7   | 119  | No significant difference ( $\chi^2$ test)                                                                                  |
|                    | Junior college                                | 24  | 233  |                                                                                                                             |
|                    | Bachelor and above                            | 3   | 39   |                                                                                                                             |
| <b>Liu, 2017</b>   | Secondary technical school and below          | 45  | 283  | Significant difference ( $\chi^2=5.047$ , $P=0.080$ ).                                                                      |
|                    | Junior college                                | 207 | 956  |                                                                                                                             |
|                    | Bachelor and above                            | 268 | 1502 |                                                                                                                             |
| <b>Xu, 2015</b>    | Secondary technical school and below          | 60  | 152  | Significant difference ( $\chi^2=18.689$ , $P=0.005$ ).                                                                     |
|                    | Junior college                                | 142 | 258  |                                                                                                                             |
|                    | Bachelor and above                            | 44  | 42   |                                                                                                                             |
| <b>Wan, 2013</b>   | Secondary technical school and below          | 24  | 113  | No significant difference ( $\chi^2$ test)                                                                                  |
|                    | Junior college and above                      | 77  | 276  |                                                                                                                             |
| <b>Shen, 2018</b>  | Middle school and below                       | 48  | 96   | No significant difference ( $\chi^2$ test)                                                                                  |
|                    | High school                                   | 38  | 93   |                                                                                                                             |
|                    | Secondary technical school                    | 366 | 695  |                                                                                                                             |
|                    | Junior college                                | 108 | 193  |                                                                                                                             |
|                    | Bachelor and above                            | 8   | 24   |                                                                                                                             |
|                    |                                               |     |      |                                                                                                                             |
| <b>Liu, 2019</b>   | Middle school and below                       | 18  | 231  | Significant difference ( $\chi^2=190.53$ , $P<0.001$ );<br>Secondary technical school, $OR=9.19$ ,<br>$95\%CI=1.27-66.26$ . |
|                    | Secondary technical school                    | 397 | 4721 |                                                                                                                             |
|                    | Junior college                                | 757 | 5850 |                                                                                                                             |
|                    | Bachelor                                      | 655 | 3488 |                                                                                                                             |
|                    | Master                                        | 27  | 77   |                                                                                                                             |
|                    | Doctor                                        | 4   | 2    |                                                                                                                             |
|                    |                                               |     |      |                                                                                                                             |

#### A4- Region

| Author           | Group   | TI  | Non-TI | Results                                    |
|------------------|---------|-----|--------|--------------------------------------------|
| <b>Sun, 2013</b> | Hubei   | 307 | 168    | No significant difference ( $\chi^2$ test) |
|                  | Guizhou | 254 | 381    |                                            |
|                  | Hebei   | 223 | 332    |                                            |

|                  |                |     |     |                                                        |
|------------------|----------------|-----|-----|--------------------------------------------------------|
|                  | Guangdong      | 231 | 241 |                                                        |
|                  | Zhejiang       | 229 | 303 |                                                        |
| <b>Liu, 2017</b> | Remote village | 166 | 847 | Significant difference ( $\chi^2=10.414$ , $P=0.005$ ) |
|                  | Normal village | 215 | 988 |                                                        |
|                  | Urban region   | 139 | 930 |                                                        |

#### A5- Marital status

| Author              | Group     | TI   | Non-TI | Results                                                |
|---------------------|-----------|------|--------|--------------------------------------------------------|
| <b>Liu JL, 2019</b> | unmarried | 403  | 913    | No significant difference ( $\chi^2$ test)             |
|                     | married   | 1065 | 2665   |                                                        |
| <b>Xu, 2012</b>     | unmarried | 13   | 189    | Significant difference ( $\chi^2=17.447$ , $P=0.002$ ) |
|                     | married   | 35   | 655    |                                                        |
|                     | others    | 0    | 41     |                                                        |
| <b>Ou, 2018</b>     | unmarried | 40   | 177    | No significant difference ( $\chi^2$ test)             |
|                     | married   | 184  | 828    |                                                        |
|                     | divorce   | 3    | 20     |                                                        |
| <b>Xu, 2015</b>     | unmarried | 75   | 125    | No significant difference ( $\chi^2$ test)             |
|                     | married   | 160  | 310    |                                                        |
|                     | others    | 9    | 20     |                                                        |
| <b>Wan, 2013</b>    | unmarried | 28   | 111    | No significant difference ( $\chi^2$ test)             |
|                     | married   | 72   | 267    |                                                        |
|                     | divorce   | 1    | 12     |                                                        |
| <b>Zhou, 2016</b>   | unmarried | 90   | 113    | Significant difference ( $\chi^2=7.45$ , $P=0.05$ )    |
|                     | married   | 173  | 342    |                                                        |
|                     | others    | 6    | 13     |                                                        |
| <b>Liu, 2017</b>    | unmarried | 17   | 111    | Significant difference ( $\chi^2=7.091$ , $P=0.008$ )  |
|                     | married   | 17   | 276    |                                                        |
|                     | divorce   | 0    | 4      |                                                        |

#### A6- Nation

| Author            | Group      | TI  | Non-TI | Results                                    |
|-------------------|------------|-----|--------|--------------------------------------------|
| <b>Wan, 2013</b>  | Ethnic Han | 60  | 254    | No significant difference ( $\chi^2$ test) |
|                   | Others     | 41  | 138    |                                            |
| <b>Shen, 2018</b> | Ethnic Han | 517 | 998    | No significant difference ( $\chi^2$ test) |
|                   | Minority   | 51  | 103    |                                            |

#### A7- Major

| Author            | Group             | TI  | Non-TI | Results                                    |
|-------------------|-------------------|-----|--------|--------------------------------------------|
| <b>Shen, 2018</b> | Clinical medicine | 442 | 803    | No significant difference ( $\chi^2$ test) |
|                   |                   | 57  | 143    |                                            |



|                  |                   |    |     |                                                        |
|------------------|-------------------|----|-----|--------------------------------------------------------|
|                  | Clinical Chinese  |    |     |                                                        |
|                  | medicine          | 12 | 36  |                                                        |
|                  | Public health     | 28 | 38  |                                                        |
|                  | Nursing           | 2  | 3   |                                                        |
|                  | Pharmacy          | 9  | 31  |                                                        |
|                  | Other medical     |    |     |                                                        |
|                  | specialties       | 18 | 47  |                                                        |
|                  | Other non-medical |    |     |                                                        |
|                  | specialties       |    |     |                                                        |
| <b>Wan, 2013</b> | Clinical medicine | 44 | 118 | Significant difference ( $\chi^2=8.597$ , $P=0.014$ ). |
|                  | Nursing           | 41 | 168 |                                                        |
|                  | Others            | 16 | 106 |                                                        |

### ***B1- Occupation***

| <b>Author</b>    | <b>Group</b>         | <b>TI</b> | <b>Non-TI</b> | <b>Results</b>                                                                                                  |
|------------------|----------------------|-----------|---------------|-----------------------------------------------------------------------------------------------------------------|
| <b>Sun, 2013</b> | Doctor               | 444       | 706           | Significant difference ( $\chi^2=12.305$ , $P=0.006$ );<br>Medical technician, OR=0.796, 95%CI=0.645-<br>0.982. |
|                  | Nurse                | 444       | 612           |                                                                                                                 |
|                  | Medical technician   | 231       | 455           |                                                                                                                 |
|                  | Public health        | 125       | 195           |                                                                                                                 |
|                  | worker               |           |               |                                                                                                                 |
| <b>Xu, 2012</b>  | Doctor               | 24        | 346           | No significant difference ( $\chi^2$ test)                                                                      |
|                  | Nurse                | 14        | 307           |                                                                                                                 |
|                  | Public health        | 6         | 76            |                                                                                                                 |
|                  | Administrative staff | 1         | 48            |                                                                                                                 |
|                  | Medical technician   | 3         | 98            |                                                                                                                 |
| <b>Yao, 2011</b> | Doctor               | 67        | 109           | Significant difference ( $\chi^2=18.558$ , $P=0.026$ ).                                                         |
|                  | Public health        | 12        | 2             |                                                                                                                 |
|                  | worker               |           |               |                                                                                                                 |
|                  | Pharmacist           | 12        | 16            |                                                                                                                 |
|                  | Nurse                | 60        | 83            |                                                                                                                 |
|                  | Medical technician   | 7         | 4             |                                                                                                                 |
| <b>Ou, 2018</b>  | Doctor               | 101       | 394           | Significant difference ( $\chi^2=15.028$ , $P=0.002$ ).                                                         |
|                  | Nurse                | 94        | 397           |                                                                                                                 |
|                  | Public health        | 17        | 64            |                                                                                                                 |
|                  | worker               |           |               |                                                                                                                 |
| <b>Liu, 2017</b> | Medical technician   | 15        | 170           | Significant difference ( $\chi^2=20.673$ , $P<0.001$ )                                                          |
|                  | Doctor               | 204       | 1217          |                                                                                                                 |
|                  | Nurse                | 199       | 831           |                                                                                                                 |
|                  | Medical technician   | 104       | 556           |                                                                                                                 |
|                  | Administrative staff | 13        | 158           |                                                                                                                 |

**B2- Job title**

| Author              | Group                     | TI  | Non-TI | Results                                                 |
|---------------------|---------------------------|-----|--------|---------------------------------------------------------|
| <b>Sun, 2013</b>    | No title                  | 110 | 219    | Significant difference ( $\chi^2=12.305$ , $P=0.016$ ). |
|                     | Junior title              | 693 | 994    |                                                         |
|                     | Middle title              | 388 | 651    |                                                         |
|                     | Senior title              | 53  | 104    |                                                         |
| <b>Wan, 2013</b>    | No title                  | 42  | 200    | No significant difference ( $\chi^2$ test)              |
|                     | Junior and Middle title   | 57  | 175    |                                                         |
|                     | Senior title              | 2   | 17     |                                                         |
| <b>Liu JL, 2019</b> | Medical assistant         | 491 | 1213   | No significant difference ( $\chi^2$ test)              |
|                     | Resident physician        | 635 | 1500   |                                                         |
|                     | Attending physician       | 262 | 646    |                                                         |
|                     | Associate chief physician | 58  | 166    |                                                         |
|                     | Chief physician           | 22  | 53     |                                                         |
| <b>Xu, 2012</b>     | No title                  | 6   | 108    | No significant difference ( $\chi^2$ test)              |
|                     | Junior title              | 29  | 504    |                                                         |
|                     | Middle title              | 11  | 223    |                                                         |
|                     | Senior title              | 2   | 40     |                                                         |
| <b>Yao, 2011</b>    | No title                  | 25  | 15     | No significant difference ( $\chi^2$ test)              |
|                     | Junior title              | 101 | 100    |                                                         |
|                     | Middle title              | 36  | 34     |                                                         |
|                     | Senior title              | 7   | 8      |                                                         |
| <b>Ou, 2018</b>     | Junior title              | 152 | 680    | No significant difference ( $\chi^2$ test)              |
|                     | Middle title              | 67  | 306    |                                                         |
|                     | Senior title              | 8   | 39     |                                                         |
| <b>Xu, 2015</b>     | No title                  | 102 | 226    | No significant difference ( $\chi^2$ test)              |
|                     | Junior title              | 88  | 173    |                                                         |
|                     | Middle title              | 22  | 64     |                                                         |
|                     | Senior title              | 5   | 20     |                                                         |
| <b>Liu, 2019</b>    | Intern                    | 229 | 1752   | No significant difference ( $\chi^2$ test)              |
|                     | Junior title doctor       | 746 | 6010   |                                                         |
|                     | Middle title doctor       | 466 | 3589   |                                                         |
|                     | Senior title doctor       | 417 | 3018   |                                                         |
| <b>Shen,2018</b>    | No title                  | 320 | 646    | No significant difference ( $\chi^2$ test)              |
|                     | Junior title              | 219 | 383    |                                                         |
|                     | Middle title              | 27  | 69     |                                                         |
|                     | Senior title              | 2   | 3      |                                                         |
| <b>Zhou,2016</b>    | No title                  | 19  | 14     | Significant difference ( $\chi^2=22.04$ , $P<0.01$ ).   |
|                     | Junior title              | 180 | 279    |                                                         |
|                     | Middle title              | 58  | 154    |                                                         |

|                  |              |     |      |                                            |
|------------------|--------------|-----|------|--------------------------------------------|
|                  | Senior title | 2   | 19   |                                            |
| <b>Liu, 2017</b> | No title     | 9   | 80   | No significant difference ( $\chi^2$ test) |
|                  | Junior title | 270 | 1420 |                                            |
|                  | Middle title | 229 | 1138 |                                            |
|                  | Senior title | 5   | 70   |                                            |

### B3- Work seniority

| Author             | Group       | TI          | Non-TI      | Results                                              |
|--------------------|-------------|-------------|-------------|------------------------------------------------------|
| <b>Sun, 2013</b>   | ≤ 1 year    | 113         | 168         | Significant difference ( $\chi^2=14.639$ , P=0.012)  |
|                    | 2–5 years   | 259         | 381         |                                                      |
|                    | 6–10 years  | 238         | 332         |                                                      |
|                    | 11–15 years | 167         | 241         |                                                      |
|                    | 16–20 years | 197         | 303         |                                                      |
|                    | ≥ 20 years  | 270         | 543         |                                                      |
| <b>Wan, 2013</b>   | < 5 years   | 40          | 180         | No significant difference ( $\chi^2$ test)           |
|                    | 5–19 years  | 53          | 148         |                                                      |
|                    | ≥ 20 years  | 8           | 64          |                                                      |
| <b>Fang, 2014</b>  | < 5 year    | 30          | 75          | No significant difference ( $\chi^2$ test)           |
|                    | 5–15 years  | 193         | 287         |                                                      |
|                    | 15–25 years | 196         | 336         |                                                      |
|                    | ≥ 25 years  | 276         | 496         |                                                      |
| <b>Xu, 2012</b>    | < 3 years   | 20          | 288         | Significant difference ( $\chi^2=16.816$ , P=0.002)  |
|                    | 3–5 years   | 14          | 315         |                                                      |
|                    | ≥ 6 years   | 13          | 259         |                                                      |
| <b>Yao, 2011</b>   | <3 year     | 56          | 60          | No significant difference ( $\chi^2$ test)           |
|                    | 3–5 years   | 39          | 39          |                                                      |
|                    | 6–9 years   | 25          | 21          |                                                      |
|                    | ≥ 10 years  | 48          | 36          |                                                      |
| <b>Ou, 2018</b>    | Mean        | 9.51 ± 7.13 | 9.71 ± 7.77 | No significant difference ( $\chi^2$ test)           |
| <b>Zhang, 2013</b> | ≤ 5 year    | 18          | 157         | Significant difference ( $\chi^2=4.149$ , P=0.042).  |
|                    | 5–9 years   | 4           | 77          |                                                      |
|                    | 10–14 years | 8           | 76          |                                                      |
|                    | 15–19 years | 2           | 60          |                                                      |
|                    | ≥ 20 years  | 2           | 55          |                                                      |
| <b>Shen, 2018</b>  | 0–9 years   | 31          | 43          | Significant difference ( $\chi^2=13.599$ , P=0.018). |
|                    | 10–19 years | 160         | 310         |                                                      |
|                    | 20–29 years | 212         | 358         |                                                      |
|                    | 30–39 years | 98          | 194         |                                                      |
|                    | 40–49 years | 63          | 179         |                                                      |
|                    | ≥ 50 years  | 4           | 17          |                                                      |

**B4- Qualified to practice**

| Author     | Group | TI  | Non-TI | Results                                    |
|------------|-------|-----|--------|--------------------------------------------|
| Fang, 2014 | Yes   | 528 | 925    | No significant difference ( $\chi^2$ test) |
|            | No    | 167 | 269    |                                            |

**B5- Income**

| Author       | Group                    | TI  | Non-TI | Results                                                                                          |
|--------------|--------------------------|-----|--------|--------------------------------------------------------------------------------------------------|
| Liu JL, 2019 | < 163.4                  | 134 | 302    | Significant difference ( $\chi^2$ test, P<0.001);<br>326.8-490.1, OR=1.26, 95%CI=1.02-1.55       |
|              | 163.5-326.7              | 618 | 1324   |                                                                                                  |
|              | 326.8-490.1              | 539 | 1310   |                                                                                                  |
|              | $\geq$ 490.2             | 177 | 624    |                                                                                                  |
| Fang,2014    | The upper layer          | 0   | 4      | Significant difference ( $\chi^2=42.385$ , P<0.001)                                              |
|              | Between upper and middle | 15  | 42     |                                                                                                  |
|              | Middle level             | 134 | 354    |                                                                                                  |
|              | Between middle and lower | 320 | 540    |                                                                                                  |
|              | The lower layer          | 222 | 250    |                                                                                                  |
| Lu,2018      | The lower layer          | 216 | 415    | Significant difference ( $\chi^2=10.952$ , P=0.012).                                             |
|              | Middle level             | 94  | 272    |                                                                                                  |
|              | The upper layer          | 9   | 31     |                                                                                                  |
| Liu, 2019    | < 1000RMB                | 41  | 79     | Significant difference ( $\chi^2=129.56$ , P<0.001);<br>5001-8000 RMB, OR=6.67, 95%CI=1.66-26.75 |
|              | 1001-3000 RMB            | 776 | 4874   |                                                                                                  |
|              | 3001-5000 RMB            | 932 | 8347   |                                                                                                  |
|              | 5001-8000 RMB            | 104 | 1046   |                                                                                                  |
|              | 8001-10000 RMB           | 0   | 17     |                                                                                                  |
| Wan, 2013    | $\leq$ 3000              | 94  | 334    | Significant difference ( $\chi^2=4.340$ , P=0.037).                                              |
|              | >3000                    | 7   | 58     |                                                                                                  |

**B6- Medical institution**

| Author       | Group                                     | TI  | Non-TI | Results                                                                                                                |
|--------------|-------------------------------------------|-----|--------|------------------------------------------------------------------------------------------------------------------------|
| Liu JL, 2019 | Township hospital                         | 480 | 1027   | Significant difference ( $\chi^2$ test, P<0.001);<br>CDC, OR=0.74, 95%CI=0.58-0.94;<br>TCMH, OR=1.15, 95%CI=0.94-1.41. |
|              | Center for Disease Control and Prevention | 131 | 485    |                                                                                                                        |
|              | Maternity and child health hospital       | 210 | 584    |                                                                                                                        |
|              |                                           | 249 | 490    |                                                                                                                        |

|                  |                                         |     |     |                                                        |
|------------------|-----------------------------------------|-----|-----|--------------------------------------------------------|
|                  | Traditional Chinese<br>medical hospital | 398 | 992 |                                                        |
|                  | County general<br>hospital              |     |     |                                                        |
| <b>Yao, 2011</b> | Community center                        | 139 | 108 | Significant difference ( $\chi^2=7.436$ , $P=0.007$ ). |
|                  | Community station                       | 31  | 49  |                                                        |
| <b>Wan, 2013</b> | County                                  | 94  | 334 | Significant difference ( $\chi^2=4.340$ , $P=0.037$ ). |
|                  | Town                                    | 7   | 58  |                                                        |

### ***B7- Organizational affiliation***

| <b>Author</b>    | <b>Group</b>              | <b>TI</b> | <b>Non-TI</b> | <b>Results</b>                                          |
|------------------|---------------------------|-----------|---------------|---------------------------------------------------------|
| <b>Xu, 2012</b>  | Establishment<br>strength | 21        | 499           | No significant difference ( $\chi^2$ test)              |
|                  | Temporary<br>employment   | 24        | 342           |                                                         |
|                  | Others                    | 3         | 44            |                                                         |
| <b>Liu, 2019</b> | Establishment<br>strength | 121       | 1016          | Significant difference ( $\chi^2=48.24$ , $P<0.001$ ).  |
|                  | Long-term<br>employment   | 214       | 1798          |                                                         |
|                  | Temporary<br>employment   | 371       | 2023          |                                                         |
|                  | Others                    | 56        | 381           |                                                         |
| <b>Liu, 2017</b> | Establishment<br>strength | 9         | 224           | Significant difference ( $\chi^2=11.995$ , $P<0.001$ ). |
|                  | Temporary<br>employment   | 25        | 192           |                                                         |

### ***B8- Re-employ after retirement***

| <b>Author</b>   | <b>Group</b> | <b>TI</b> | <b>Non-TI</b> | <b>Results</b>                             |
|-----------------|--------------|-----------|---------------|--------------------------------------------|
| <b>Xu, 2015</b> | Yes          | 26        | 48            | No significant difference ( $\chi^2$ test) |
|                 | No           | 200       | 371           |                                            |

### ***B9- Turnover experience***

| <b>Author</b>    | <b>Group</b> | <b>TI</b> | <b>Non-TI</b> | <b>Results</b>                             |
|------------------|--------------|-----------|---------------|--------------------------------------------|
| <b>Wan, 2013</b> | No           | 55        | 224           | No significant difference ( $\chi^2$ test) |
|                  | Yes          | 46        | 168           |                                            |

### ***B10- Individual income levels in the local***

| Author           | Group                    | TI  | Non-TI | Results                                                 |
|------------------|--------------------------|-----|--------|---------------------------------------------------------|
| <b>Fang,2014</b> | The upper layer          | 0   | 4      | Significant difference ( $\chi^2=42.385$ , $P<0.001$ )  |
|                  | Between upper and middle | 15  | 42     |                                                         |
|                  | Middle level             | 134 | 354    |                                                         |
|                  | Between middle and lower | 320 | 540    |                                                         |
|                  | The lower layer          | 222 | 250    |                                                         |
| <b>Lu,2018</b>   | The lower layer          | 216 | 415    | Significant difference ( $\chi^2=10.952$ , $P=0.012$ ). |
|                  | Middle level             | 94  | 272    |                                                         |
|                  | The upper layer          | 9   | 31     |                                                         |

### *B11- Work stress*

| Author            | Group       | TI  | Non-TI | Results                                                                                      |
|-------------------|-------------|-----|--------|----------------------------------------------------------------------------------------------|
| <b>Ou, 2018</b>   | High        | 166 | 567    | Significant difference ( $\chi^2=24.291$ , $P<0.001$ );<br>Yes, OR=2.179, 95%CI=1.572-3.019. |
|                   | Low         | 61  | 458    |                                                                                              |
| <b>Wan, 2013</b>  | High        | 61  | 182    | Significant difference ( $\chi^2=2.271$ , $P=0.040$ ).                                       |
|                   | Not too bad | 29  | 159    |                                                                                              |
|                   | Low         | 11  | 51     |                                                                                              |
| <b>Xu, 2015</b>   | High        | 147 | 211    | Significant difference ( $\chi^2=16.715$ , $P=0.002$ ).                                      |
|                   | Not too bad | 77  | 204    |                                                                                              |
|                   | Low         | 21  | 41     |                                                                                              |
| <b>Liu, 2019</b>  | Very high   | 849 | 3458   | Significant difference ( $\chi^2=424.24$ , $P<0.001$ );<br>High, OR=0.41, 95%CI=0.25-0.65    |
|                   | High        | 783 | 8525   |                                                                                              |
|                   | Not too bad | 118 | 777    |                                                                                              |
|                   | Low         | 89  | 1418   |                                                                                              |
|                   | Very low    | 19  | 191    |                                                                                              |
| <b>Zhou, 2016</b> | Very high   | 75  | 42     | Significant difference ( $\chi^2=50.40$ , $P<0.01$ ).                                        |
|                   | High        | 116 | 216    |                                                                                              |
|                   | Low         | 78  | 212    |                                                                                              |

### *B12- Emotional Exhaustion*

| Author            | Group       | TI  | Non-TI | Results                                                                                        |
|-------------------|-------------|-----|--------|------------------------------------------------------------------------------------------------|
| <b>Shen, 2018</b> | Severe      | 288 | 299    | Significant difference ( $\chi^2=105.750$ , $P<0.001$ )<br>Severe, OR=2.436, 95%CI=1.695-3.500 |
|                   | Moderate    | 162 | 349    |                                                                                                |
|                   | None        | 118 | 453    |                                                                                                |
| <b>Lu, 2018</b>   | Bad         | 215 | 147    | Significant difference ( $\chi^2=400.485$ , $P<0.001$ ).                                       |
|                   | Not too bad | 63  | 211    |                                                                                                |
|                   | Good        | 41  | 360    |                                                                                                |

**B13- Flattening of affect**

| Author     | Group    | TI  | Non-TI | Results                                                                                                                                   |
|------------|----------|-----|--------|-------------------------------------------------------------------------------------------------------------------------------------------|
| Shen, 2018 | Severe   | 128 | 138    | Significant difference ( $\chi^2=105.750$ , $P<0.001$ )<br>Severe, OR=1.626, 95%CI=1.064-2.485;<br>Moderate, OR=1.486, 95%CI=1.069-2.066. |
|            | Moderate | 332 | 648    |                                                                                                                                           |
|            | None     | 108 | 315    |                                                                                                                                           |

**B14- Public health service**

| Author      | Group              | TI | Non-TI | Results                                              |
|-------------|--------------------|----|--------|------------------------------------------------------|
| Zhang, 2015 | More participation | 38 | 66     | Significant difference ( $\chi^2=6.89$ , $P<0.01$ ). |
|             | Less participation | 11 | 52     |                                                      |

**B15- Working hours**

| Author    | Group     | TI | Non-TI | Results                                                 |
|-----------|-----------|----|--------|---------------------------------------------------------|
| Wan, 2013 | $\leq 40$ | 26 | 131    | Significant difference ( $\chi^2=12.033$ , $P=0.002$ ). |
|           | 41-59     | 40 | 187    |                                                         |
|           | $\geq 60$ | 35 | 73     |                                                         |

**B16- Career planning**

| Author    | Group      | TI | Non-TI | Results                                                |
|-----------|------------|----|--------|--------------------------------------------------------|
| Wan, 2013 | No         | 14 | 55     | Significant difference ( $\chi^2=2.553$ , $P=0.012$ ). |
|           | In-between | 68 | 231    |                                                        |
|           | Yes        | 14 | 110    |                                                        |

**B17- Career identity (be pound of this job)**

| Author    | Group      | TI | Non-TI | Results                                    |
|-----------|------------|----|--------|--------------------------------------------|
| Wan, 2013 | No         | 11 | 45     | No significant difference ( $\chi^2$ test) |
|           | In-between | 47 | 166    |                                            |
|           | Yes        | 46 | 181    |                                            |

**B18- Social status**

| Author    | Group        | TI  | Non-TI | Results                                                  |
|-----------|--------------|-----|--------|----------------------------------------------------------|
| Lu, 2018  | High         | 171 | 521    | Significant difference ( $\chi^2=50.815$ , $P<0.001$ ).  |
|           | Low          | 148 | 187    |                                                          |
| Xu, 2015  | Dissatisfied | 21  | 9      | Significant difference ( $\chi^2=217.296$ , $P=0.002$ ). |
|           | Not too bad  | 79  | 108    |                                                          |
|           | Satisfied    | 146 | 328    |                                                          |
| Wan, 2013 | Dissatisfied | 7   | 18     | No significant difference ( $\chi^2$ test)               |
|           | Not too bad  | 54  | 187    |                                                          |

|           |    |     |
|-----------|----|-----|
| Satisfied | 40 | 187 |
|-----------|----|-----|

**B19- Influence family life**

| Author    | Group | TI   | Non-TI | Results                                    |
|-----------|-------|------|--------|--------------------------------------------|
| Sun, 2013 | Yse   | 108  | 150    | No significant difference ( $\chi^2$ test) |
|           | No    | 1136 | 1818   |                                            |

**B20- Living condition**

| Author    | Group        | TI  | Non-TI | Results                                                 |
|-----------|--------------|-----|--------|---------------------------------------------------------|
| Xu, 2015  | Dissatisfied | 126 | 176    | Significant difference ( $\chi^2=26.907$ , $P<0.001$ ). |
|           | Not too bad  | 97  | 213    |                                                         |
|           | Satisfied    | 23  | 67     |                                                         |
| Wan, 2013 | Dissatisfied | 7   | 56     | No significant difference ( $\chi^2$ test)              |
|           | Not too bad  | 56  | 223    |                                                         |
|           | Satisfied    | 38  | 113    |                                                         |

**B21- Lack of insurance**

| Author     | Group | TI  | Non-TI | Results                                                                                     |
|------------|-------|-----|--------|---------------------------------------------------------------------------------------------|
| Shen, 2018 | Yes   | 473 | 965    | Significant difference ( $\chi^2=5.228$ , $P=0.022$ );<br>Yes, OR=1.769, 95%CI=1.291-2.423. |
|            | No    | 95  | 236    |                                                                                             |

**B22- Patient trust**

| Author    | Group      | TI | Non-TI | Results                                    |
|-----------|------------|----|--------|--------------------------------------------|
| Wan, 2013 | No         | 5  | 8      | No significant difference ( $\chi^2$ test) |
|           | In-between | 45 | 162    |                                            |
|           | Yes        | 51 | 222    |                                            |

**C1- Learning and training opportunity**

| Author     | Group        | TI  | Non-TI | Results                                                 |
|------------|--------------|-----|--------|---------------------------------------------------------|
| Xu, 2015   | Satisfied    | 7   | 35     | Significant difference ( $\chi^2=22.697$ , $P<0.001$ ). |
|            | Not too bad  | 100 | 243    |                                                         |
|            | Dissatisfied | 140 | 178    |                                                         |
| Shen, 2018 | Yse          | 236 | 394    | Significant difference ( $\chi^2=5.297$ , $P=0.021$ ).  |
|            | No           | 332 | 707    |                                                         |
| Wan, 2013  | Dissatisfied | 50  | 89     | Significant difference ( $\chi^2=5.549$ , $P<0.001$ ).  |
|            | Not too bad  | 45  | 226    |                                                         |
|            | Satisfied    | 6   | 76     |                                                         |



**C2- Promotion and individual development space**

| Author            | Group        | TI  | Non-TI | Results                                                      |
|-------------------|--------------|-----|--------|--------------------------------------------------------------|
| <b>Fang, 2014</b> | Dissatisfied | 209 | 132    | Significant difference ( $\chi^2 = 113.797$ , $P < 0.001$ ); |
|                   | Not too bad  | 292 | 562    | Not too bad, OR=0.655, 95%CI=0.475-0.905                     |
|                   | Satisfied    | 194 | 500    |                                                              |
| <b>Wan, 2013</b>  | Dissatisfied | 50  | 78     | Significant difference ( $\chi^2 = 5.743$ , $P < 0.001$ ).   |
|                   | Not too bad  | 42  | 230    |                                                              |
|                   | Satisfied    | 9   | 84     |                                                              |
| <b>Xu, 2015</b>   | Dissatisfied | 135 | 110    | Significant difference ( $\chi^2 = 84.791$ , $P < 0.001$ ).  |
|                   | Not too bad  | 92  | 220    |                                                              |
|                   | Satisfied    | 20  | 124    |                                                              |

**C3- Interpersonal relationship**

| Author            | Group        | TI  | Non-TI | Results                                                      |
|-------------------|--------------|-----|--------|--------------------------------------------------------------|
| <b>Fang, 2014</b> | Dissatisfied | 107 | 47     | Significant difference ( $\chi^2 = 107.351$ , $P < 0.001$ ). |
|                   | Not too bad  | 181 | 216    |                                                              |
|                   | Satisfied    | 407 | 931    |                                                              |
| <b>Wan, 2013</b>  | Dissatisfied | 7   | 9      | Significant difference ( $\chi^2 = 2.684$ , $P = 0.007$ ).   |
|                   | Not too bad  | 46  | 144    |                                                              |
|                   | Satisfied    | 48  | 239    |                                                              |
| <b>Xu, 2015</b>   | Dissatisfied | 9   | 5      | Significant difference ( $\chi^2 = 21.398$ , $P < 0.001$ ).  |
|                   | Not too bad  | 82  | 109    |                                                              |
|                   | Satisfied    | 156 | 342    |                                                              |

**C4- Work conditions and environment**

| Author            | Group        | TI  | Non-TI | Results                                                      |
|-------------------|--------------|-----|--------|--------------------------------------------------------------|
| <b>Fang, 2014</b> | Dissatisfied | 231 | 133    | Significant difference ( $\chi^2 = 159.456$ , $P < 0.001$ ); |
|                   | Not too bad  | 224 | 372    | Not too bad, OR=1.604, 95%CI=1.172-2.194;                    |
|                   | Satisfied    | 240 | 689    | Dissatisfied, OR=2.406, 95%CI=1.686-3.435.                   |
| <b>Lu, 2018</b>   | Dissatisfied | 174 | 204    | Significant difference ( $\chi^2 = 168.223$ , $P < 0.001$ ). |
|                   | Not too bad  | 116 | 286    |                                                              |
|                   | Satisfied    | 29  | 228    |                                                              |
| <b>Xu, 2015</b>   | Dissatisfied | 91  | 59     | Significant difference ( $\chi^2 = 84.959$ , $P < 0.001$ )   |
|                   | Not too bad  | 122 | 243    |                                                              |
|                   | Satisfied    | 34  | 120    |                                                              |
| <b>Wan, 2013</b>  | Dissatisfied | 24  | 61     | Significant difference ( $\chi^2 = 25.4$ , $P < 0.001$ ).    |
|                   | Not too bad  | 68  | 243    |                                                              |
|                   | Satisfied    | 9   | 88     |                                                              |
| <b>Zhou, 2016</b> | Good         | 92  | 290    | Significant difference ( $\chi^2 = 54.16$ , $P < 0.01$ )     |
|                   | Bad          | 177 | 175    |                                                              |

**C5- Individual value embodiment**

| Author            | Group        | TI  | Non-TI | Results                                                     |
|-------------------|--------------|-----|--------|-------------------------------------------------------------|
| <b>Fang, 2014</b> | Dissatisfied | 123 | 62     | Significant difference ( $\chi^2 = 97.266$ , $P < 0.001$ )  |
|                   | Not too bad  | 236 | 343    |                                                             |
|                   | Satisfied    | 336 | 789    |                                                             |
| <b>Lu, 2018</b>   | Dissatisfied | 161 | 217    | Significant difference ( $\chi^2 = 286.382$ , $P < 0.001$ ) |
|                   | Not too bad  | 83  | 319    |                                                             |
|                   | Satisfied    | 75  | 182    |                                                             |
| <b>Wan, 2013</b>  | Dissatisfied | 7   | 9      | No significant difference ( $\chi^2$ test)                  |
|                   | Not too bad  | 46  | 144    |                                                             |
|                   | Satisfied    | 48  | 239    |                                                             |

**C6- Scientific research atmosphere**

| Author           | Group | TI   | Non-TI | Results                                    |
|------------------|-------|------|--------|--------------------------------------------|
| <b>Sun, 2013</b> | Yse   | 22   | 49     | No significant difference ( $\chi^2$ test) |
|                  | No    | 1222 | 1919   |                                            |

**C7- Level of attention by leaders**

| Author            | Group        | TI  | Non-TI | Results                                                    |
|-------------------|--------------|-----|--------|------------------------------------------------------------|
| <b>Fang, 2014</b> | Dissatisfied | 103 | 52     | Significant difference ( $\chi^2 = 94.244$ , $P < 0.001$ ) |
|                   | Not too bad  | 216 | 271    |                                                            |
|                   | Satisfied    | 376 | 871    |                                                            |
| <b>Xu, 2015</b>   | Dissatisfied | 59  | 41     | Significant difference ( $\chi^2 = 51.405$ , $P < 0.001$ ) |
|                   | Not too bad  | 135 | 212    |                                                            |
|                   | Satisfied    | 53  | 201    |                                                            |
| <b>Wan, 2013</b>  | Dissatisfied | 18  | 26     | Significant difference ( $\chi^2 = 4.346$ , $P < 0.001$ )  |
|                   | Not too bad  | 69  | 244    |                                                            |
|                   | Satisfied    | 14  | 122    |                                                            |

**C8- Income satisfaction**

| Author            | Group           | TI  | Non-TI | Results                                                     |                                            |
|-------------------|-----------------|-----|--------|-------------------------------------------------------------|--------------------------------------------|
| <b>Fang, 2014</b> | Satisfactory    | 18  | 95     | Significant difference ( $\chi^2 = 121.542$ , $P < 0.001$ ) |                                            |
|                   | Not too bad     | 177 | 548    |                                                             | Satisfactory, OR=0.284, 95%CI=0.161-0.501; |
|                   | Dissatisfactory | 500 | 551    |                                                             | Not too bad, OR=0.536, 95%CI=0.418-0.689.  |
| <b>Lu, 2018</b>   | Satisfactory    | 20  | 120    | Significant difference ( $\chi^2 = 18.128$ , $P < 0.001$ ). |                                            |
|                   | Not too bad     | 29  | 147    |                                                             |                                            |
|                   | Dissatisfactory | 270 | 451    |                                                             |                                            |
| <b>Xu, 2015</b>   | Dissatisfied    | 196 | 273    | Significant difference ( $\chi^2 = 38.497$ , $P < 0.001$ ). |                                            |

|                   |              |     |     |                                                                                                                                                                                                                              |
|-------------------|--------------|-----|-----|------------------------------------------------------------------------------------------------------------------------------------------------------------------------------------------------------------------------------|
|                   | Not too bad  | 45  | 150 |                                                                                                                                                                                                                              |
|                   | Satisfied    | 5   | 32  |                                                                                                                                                                                                                              |
| <b>Wan, 2013</b>  | Dissatisfied | 70  | 174 | Significant difference ( $\chi^2=4.608$ , $P<0.001$ ).                                                                                                                                                                       |
|                   | Not too bad  | 29  | 183 |                                                                                                                                                                                                                              |
|                   | Satisfied    | 2   | 35  |                                                                                                                                                                                                                              |
| <b>Shen, 2018</b> | 0-19%        | 12  | 7   | Significant difference ( $\chi^2=121.542$ , $P<0.001$ )<br>0-19%, OR=20.738, 95%CI=3.815-121.717;<br>20-39%, OR=6.101, 95%CI=1.573-23.665;<br>40-59%, OR=5.567, 95%CI=1.490-21.469;<br>60-79%, OR=4.457, 95%CI=1.148-17.299. |
|                   | 20-39%       | 131 | 180 |                                                                                                                                                                                                                              |
|                   | 40-59%       | 893 | 578 |                                                                                                                                                                                                                              |
|                   | 60-79%       | 339 | 148 |                                                                                                                                                                                                                              |
|                   | 80-99%       | 75  | 59  |                                                                                                                                                                                                                              |
|                   | 100%         | 32  | 29  |                                                                                                                                                                                                                              |

### *C9- Keep busy and fulfilling*

| Author            | Group               | TI  | Non-TI | Results                                                                                                   |
|-------------------|---------------------|-----|--------|-----------------------------------------------------------------------------------------------------------|
| <b>Fang, 2014</b> | Dissatisfied        | 89  | 55     | Significant difference ( $\chi^2=63.259$ , $P<0.001$ )                                                    |
|                   | Not too bad         | 186 | 235    |                                                                                                           |
|                   | Satisfied           | 420 | 904    |                                                                                                           |
| <b>Wan, 2013</b>  | Dissatisfied        | 7   | 7      | Significant difference ( $\chi^2=3.827$ , $P<0.001$ )                                                     |
|                   | Not too bad         | 65  | 197    |                                                                                                           |
|                   | Satisfied           | 29  | 188    |                                                                                                           |
| <b>Lu, 2018</b>   | Dissatisfied        | 311 | 556    | Significant difference ( $\chi^2=127.627$ , $P<0.001$ )                                                   |
|                   | Not too bad         | 5   | 99     |                                                                                                           |
|                   | Satisfied           | 3   | 63     |                                                                                                           |
| <b>Xu, 2015</b>   | Dissatisfied        | 49  | 26     | Significant difference ( $\chi^2=60.244$ , $P<0.001$ )                                                    |
|                   | Not too bad         | 144 | 227    |                                                                                                           |
|                   | Satisfied           | 53  | 201    |                                                                                                           |
| <b>Shen, 2013</b> | Severe deficiency   | 338 | 497    | Significant difference ( $\chi^2=34.028$ , $P<0.001$ )<br>Severe deficiency, OR=2.436, 95%CI=1.695-3.500. |
|                   | Moderate deficiency | 86  | 269    |                                                                                                           |
|                   | Little deficiency   | 144 | 335    |                                                                                                           |
|                   | and none            |     |        |                                                                                                           |

### *C10- The competence of my manager in making decisions*

| Author            | Group        | TI  | Non-TI | Results                                                                                               |
|-------------------|--------------|-----|--------|-------------------------------------------------------------------------------------------------------|
| <b>Fang, 2014</b> | Dissatisfied | 82  | 24     | Significant difference ( $\chi^2=107.944$ , $P<0.001$ );<br>Dissatisfied, OR=2.017, 95%CI=1.068-3.807 |
|                   | Not too bad  | 184 | 219    |                                                                                                       |
|                   | Satisfied    | 429 | 951    |                                                                                                       |
| <b>Xu, 2015</b>   | Dissatisfied | 82  | 50     | Significant difference ( $\chi^2=81.415$ , $P<0.001$ )                                                |
|                   | Not too bad  | 123 | 212    |                                                                                                       |
|                   | Satisfied    | 42  | 191    |                                                                                                       |

|                  |              |    |     |                                            |
|------------------|--------------|----|-----|--------------------------------------------|
| <b>Wan, 2013</b> | Dissatisfied | 16 | 28  | No significant difference ( $\chi^2$ test) |
|                  | Not too bad  | 62 | 263 |                                            |
|                  | Satisfied    | 23 | 101 |                                            |

### *C11- Work stability*

| Author            | Group        | TI  | Non-TI | Results                                                     |
|-------------------|--------------|-----|--------|-------------------------------------------------------------|
| <b>Fang, 2014</b> | Dissatisfied | 110 | 30     | Significant difference ( $\chi^2 = 148.266$ , $P < 0.001$ ) |
|                   | Not too bad  | 225 | 286    | Dissatisfied, OR=1.955, 95%CI=1.107-3.454                   |
|                   | Satisfied    | 360 | 878    |                                                             |
| <b>Wan, 2013</b>  | Dissatisfied | 12  | 12     | Significant difference ( $\chi^2 = 3.984$ , $P < 0.001$ )   |
|                   | Not too bad  | 63  | 208    |                                                             |
|                   | Satisfied    | 26  | 172    |                                                             |

### *C12- Policies practice*

| Author            | Group           | TI  | Non-TI | Results                                                     |
|-------------------|-----------------|-----|--------|-------------------------------------------------------------|
| <b>Fang, 2014</b> | Dissatisfied    | 148 | 67     | Significant difference ( $\chi^2 = 145.606$ , $P < 0.001$ ) |
|                   | Not too bad     | 261 | 357    | Dissatisfied, OR=1.735, 95%CI=1.121-2.687                   |
|                   | Satisfied       | 286 | 770    |                                                             |
| <b>Zhou, 2016</b> | Useful          | 93  | 282    | Significant difference ( $\chi^2 = 45.22$ , $P < 0.01$ )    |
|                   | Useless         | 152 | 162    |                                                             |
|                   | Negative effect | 21  | 20     |                                                             |
| <b>Wan, 2013</b>  | Dissatisfied    | 18  | 28     | Significant difference ( $\chi^2 = 4.907$ , $P < 0.001$ ).  |
|                   | Not too bad     | 74  | 249    |                                                             |
|                   | Satisfied       | 9   | 115    |                                                             |

### *C13- The chance to try my own methods of doing the job*

| Author            | Group        | TI  | Non-TI | Results                                                    |
|-------------------|--------------|-----|--------|------------------------------------------------------------|
| <b>Fang, 2014</b> | Dissatisfied | 79  | 52     | Significant difference ( $\chi^2 = 46.986$ , $P < 0.001$ ) |
|                   | Not too bad  | 277 | 410    | Dissatisfied, OR=0.560, 95%CI=0.335-0.936                  |
|                   | Satisfied    | 339 | 732    |                                                            |

### *C14- The chance to do something that makes use of my abilities*

| Author            | Group        | TI  | Non-TI | Results                                                    |
|-------------------|--------------|-----|--------|------------------------------------------------------------|
| <b>Fang, 2014</b> | Dissatisfied | 68  | 27     | Significant difference ( $\chi^2 = 84.353$ , $P < 0.001$ ) |
|                   | Not too bad  | 213 | 251    |                                                            |
|                   | Satisfied    | 414 | 916    |                                                            |
| <b>Wan, 2013</b>  | Dissatisfied | 10  | 17     | Significant difference ( $\chi^2 = 3.596$ , $P = 0.001$ ). |
|                   | Not too bad  | 72  | 235    |                                                            |
|                   | Satisfied    | 19  | 140    |                                                            |

**C15- Job satisfaction**

| Author            | Group        | TI  | Non-TI | Results                                                    |
|-------------------|--------------|-----|--------|------------------------------------------------------------|
| <b>Gu, 2012</b>   | Dissatisfied | 14  | 2      | Significant difference ( $\chi^2 = 16.928$ , $P < 0.001$ ) |
|                   | Not too bad  | 40  | 18     |                                                            |
|                   | Satisfied    | 18  | 30     |                                                            |
| <b>Lu, 2018</b>   | Dissatisfied | 85  | 102    | Significant difference ( $\chi^2 = 51.182$ , $P < 0.001$ ) |
|                   | Not too bad  | 166 | 397    |                                                            |
|                   | Satisfied    | 68  | 219    |                                                            |
| <b>Zhou, 2016</b> | Dissatisfied | 76  | 27     | Significant difference ( $\chi^2 = 109.40$ , $P < 0.01$ )  |
|                   | Not too bad  | 134 | 181    |                                                            |
|                   | Satisfied    | 61  | 261    |                                                            |

**C16- Work support**

| Author          | Group        | TI  | Non-TI | Results                                                     |
|-----------------|--------------|-----|--------|-------------------------------------------------------------|
| <b>Xu, 2015</b> | Dissatisfied | 175 | 200    | Significant difference ( $\chi^2 = 67.704$ , $P < 0.001$ )  |
|                 | Not too bad  | 61  | 176    |                                                             |
|                 | Satisfied    | 8   | 75     |                                                             |
| <b>Lu, 2018</b> | Dissatisfied | 308 | 458    | Significant difference ( $\chi^2 = 234.402$ , $P < 0.001$ ) |
|                 | Not too bad  | 10  | 140    |                                                             |
|                 | Satisfied    | 1   | 120    |                                                             |

**C17- Income fairness**

| Author            | Group        | TI  | Non-TI | Results                                                    |
|-------------------|--------------|-----|--------|------------------------------------------------------------|
| <b>Zhou, 2016</b> | Unfair       | 163 | 132    | Significant difference ( $\chi^2 = 76.83$ , $P < 0.01$ ).  |
|                   | Unclear      | 13  | 17     |                                                            |
|                   | Fair         | 133 | 356    |                                                            |
| <b>Wan, 2013</b>  | Dissatisfied | 1   | 4      | Significant difference ( $\chi^2 = 3.912$ , $P < 0.001$ ). |
|                   | Not too bad  | 76  | 209    |                                                            |
|                   | Satisfied    | 24  | 179    |                                                            |

**C18- Motivation and Salary System**

| Author            | Group        | TI  | Non-TI | Results                                                    |
|-------------------|--------------|-----|--------|------------------------------------------------------------|
| <b>Xu, 2015</b>   | Dissatisfied | 146 | 151    | Significant difference ( $\chi^2 = 56.593$ , $P < 0.001$ ) |
|                   | Not too bad  | 85  | 209    |                                                            |
|                   | Satisfied    | 13  | 94     |                                                            |
| <b>Zhou, 2016</b> | Dissatisfied | 109 | 93     | Significant difference ( $\chi^2 = 56.55$ , $P < 0.001$ )  |
|                   | Not clear    | 29  | 19     |                                                            |
|                   | Satisfied    | 133 | 356    |                                                            |

|    |                  |              |    |     |                                                           |
|----|------------------|--------------|----|-----|-----------------------------------------------------------|
| 1  |                  |              |    |     |                                                           |
| 2  |                  |              |    |     |                                                           |
| 3  |                  |              |    |     |                                                           |
| 4  | <b>Wan, 2013</b> | Dissatisfied | 49 | 89  | Significant difference ( $\chi^2 = 5.363$ , $P < 0.001$ ) |
| 5  |                  | Not too bad  | 45 | 221 |                                                           |
| 6  |                  | Satisfied    | 7  | 82  |                                                           |
| 7  |                  |              |    |     |                                                           |
| 8  |                  |              |    |     |                                                           |
| 9  |                  |              |    |     |                                                           |
| 10 |                  |              |    |     |                                                           |
| 11 |                  |              |    |     |                                                           |
| 12 |                  |              |    |     |                                                           |
| 13 |                  |              |    |     |                                                           |
| 14 |                  |              |    |     |                                                           |
| 15 |                  |              |    |     |                                                           |
| 16 |                  |              |    |     |                                                           |
| 17 |                  |              |    |     |                                                           |
| 18 |                  |              |    |     |                                                           |
| 19 |                  |              |    |     |                                                           |
| 20 |                  |              |    |     |                                                           |
| 21 |                  |              |    |     |                                                           |
| 22 |                  |              |    |     |                                                           |
| 23 |                  |              |    |     |                                                           |
| 24 |                  |              |    |     |                                                           |
| 25 |                  |              |    |     |                                                           |
| 26 |                  |              |    |     |                                                           |
| 27 |                  |              |    |     |                                                           |
| 28 |                  |              |    |     |                                                           |
| 29 |                  |              |    |     |                                                           |
| 30 |                  |              |    |     |                                                           |
| 31 |                  |              |    |     |                                                           |
| 32 |                  |              |    |     |                                                           |
| 33 |                  |              |    |     |                                                           |
| 34 |                  |              |    |     |                                                           |
| 35 |                  |              |    |     |                                                           |
| 36 |                  |              |    |     |                                                           |
| 37 |                  |              |    |     |                                                           |
| 38 |                  |              |    |     |                                                           |
| 39 |                  |              |    |     |                                                           |
| 40 |                  |              |    |     |                                                           |
| 41 |                  |              |    |     |                                                           |
| 42 |                  |              |    |     |                                                           |
| 43 |                  |              |    |     |                                                           |
| 44 |                  |              |    |     |                                                           |
| 45 |                  |              |    |     |                                                           |
| 46 |                  |              |    |     |                                                           |
| 47 |                  |              |    |     |                                                           |
| 48 |                  |              |    |     |                                                           |
| 49 |                  |              |    |     |                                                           |
| 50 |                  |              |    |     |                                                           |
| 51 |                  |              |    |     |                                                           |
| 52 |                  |              |    |     |                                                           |
| 53 |                  |              |    |     |                                                           |
| 54 |                  |              |    |     |                                                           |
| 55 |                  |              |    |     |                                                           |
| 56 |                  |              |    |     |                                                           |
| 57 |                  |              |    |     |                                                           |
| 58 |                  |              |    |     |                                                           |
| 59 |                  |              |    |     |                                                           |
| 60 |                  |              |    |     |                                                           |

For peer review only

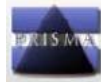

# PRISMA 2009 Checklist

| Section/topic                      | #  | Checklist item                                                                                                                                                                                                                                                                                              | Reported on page # |
|------------------------------------|----|-------------------------------------------------------------------------------------------------------------------------------------------------------------------------------------------------------------------------------------------------------------------------------------------------------------|--------------------|
| <b>TITLE</b>                       |    |                                                                                                                                                                                                                                                                                                             |                    |
| Title                              | 1  | Identify the report as a systematic review, meta-analysis, or both.                                                                                                                                                                                                                                         | 1                  |
| <b>ABSTRACT</b>                    |    |                                                                                                                                                                                                                                                                                                             |                    |
| Structured summary                 | 2  | Provide a structured summary including, as applicable: background; objectives; data sources; study eligibility criteria, participants, and interventions; study appraisal and synthesis methods; results; limitations; conclusions and implications of key findings; systematic review registration number. | 2                  |
| <b>INTRODUCTION</b>                |    |                                                                                                                                                                                                                                                                                                             |                    |
| Rationale                          | 3  | Describe the rationale for the review in the context of what is already known.                                                                                                                                                                                                                              | 3                  |
| Objectives                         | 4  | Provide an explicit statement of questions being addressed with reference to participants, interventions, comparisons, outcomes, and study design (PICOS).                                                                                                                                                  | 3                  |
| <b>METHODS</b>                     |    |                                                                                                                                                                                                                                                                                                             |                    |
| Protocol and registration          | 5  | Indicate if a review protocol exists, if and where it can be accessed (e.g., Web address), and, if available, provide registration information including registration number.                                                                                                                               | Not applicable     |
| Eligibility criteria               | 6  | Specify study characteristics (e.g., PICOS, length of follow-up) and report characteristics (e.g., years considered, language, publication status) used as criteria for eligibility, giving rationale.                                                                                                      | 4                  |
| Information sources                | 7  | Describe all information sources (e.g., databases with dates of coverage, contact with study authors to identify additional studies) in the search and date last searched.                                                                                                                                  | 4                  |
| Search                             | 8  | Present full electronic search strategy for at least one database, including any limits used, such that it could be repeated.                                                                                                                                                                               | 4                  |
| Study selection                    | 9  | State the process for selecting studies (i.e., screening, eligibility, included in systematic review, and, if applicable, included in the meta-analysis).                                                                                                                                                   | 4-5                |
| Data collection process            | 10 | Describe method of data extraction from reports (e.g., piloted forms, independently, in duplicate) and any processes for obtaining and confirming data from investigators.                                                                                                                                  | 4                  |
| Data items                         | 11 | List and define all variables for which data were sought (e.g., PICOS, funding sources) and any assumptions and simplifications made.                                                                                                                                                                       | 4                  |
| Risk of bias in individual studies | 12 | Describe methods used for assessing risk of bias of individual studies (including specification of whether this was done at the study or outcome level), and how this information is to be used in any data synthesis.                                                                                      | 5                  |
| Summary measures                   | 13 | State the principal summary measures (e.g., risk ratio, difference in means).                                                                                                                                                                                                                               | 5                  |
| Synthesis of results               | 14 | Describe the methods of handling data and combining results of studies, if done, including measures of consistency (e.g., I <sup>2</sup> ) for each meta-analysis.                                                                                                                                          | 5                  |

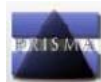

# PRISMA 2009 Checklist

Page 1 of 2

| Section/topic                 | #  | Checklist item                                                                                                                                                                                           | Reported on page # |
|-------------------------------|----|----------------------------------------------------------------------------------------------------------------------------------------------------------------------------------------------------------|--------------------|
| Risk of bias across studies   | 15 | Specify any assessment of risk of bias that may affect the cumulative evidence (e.g., publication bias, selective reporting within studies).                                                             | Not applicable     |
| Additional analyses           | 16 | Describe methods of additional analyses (e.g., sensitivity or subgroup analyses, meta-regression), if done, indicating which were pre-specified.                                                         | 4                  |
| <b>RESULTS</b>                |    |                                                                                                                                                                                                          |                    |
| Study selection               | 17 | Give numbers of studies screened, assessed for eligibility, and included in the review, with reasons for exclusions at each stage, ideally with a flow diagram.                                          | 5-6                |
| Study characteristics         | 18 | For each study, present characteristics for which data were extracted (e.g., study size, PICOS, follow-up period) and provide the citations.                                                             | 6                  |
| Risk of bias within studies   | 19 | Present data on risk of bias of each study and, if available, any outcome level assessment (see item 12).                                                                                                | 7                  |
| Results of individual studies | 20 | For all outcomes considered (benefits or harms), present, for each study: (a) simple summary data for each intervention group (b) effect estimates and confidence intervals, ideally with a forest plot. | 7-8                |
| Synthesis of results          | 21 | Present results of each meta-analysis done, including confidence intervals and measures of consistency.                                                                                                  | 7                  |
| Risk of bias across studies   | 22 | Present results of any assessment of risk of bias across studies (see Item 15).                                                                                                                          | Not applicable     |
| Additional analysis           | 23 | Give results of additional analyses, if done (e.g., sensitivity or subgroup analyses, meta-regression [see Item 16]).                                                                                    | 7                  |
| <b>DISCUSSION</b>             |    |                                                                                                                                                                                                          |                    |
| Summary of evidence           | 24 | Summarize the main findings including the strength of evidence for each main outcome; consider their relevance to key groups (e.g., healthcare providers, users, and policy makers).                     | 9-10               |
| Limitations                   | 25 | Discuss limitations at study and outcome level (e.g., risk of bias), and at review-level (e.g., incomplete retrieval of identified research, reporting bias).                                            | 10                 |
| Conclusions                   | 26 | Provide a general interpretation of the results in the context of other evidence, and implications for future research.                                                                                  | 10                 |
| <b>FUNDING</b>                |    |                                                                                                                                                                                                          |                    |
| Funding                       | 27 | Describe sources of funding for the systematic review and other support (e.g., supply of data); role of funders for the systematic review.                                                               | 10                 |

41

42 From: Moher D, Liberati A, Tetzlaff J, Altman DG, The PRISMA Group (2009). Preferred Reporting Items for Systematic Reviews and Meta-Analyses: The PRISMA Statement. PLoS Med 6(7): e1000097.  
 43 doi:10.1371/journal.pmed1000097

44 For more information, visit: [www.prisma-statement.org](http://www.prisma-statement.org).

45 For peer review only - <http://bmjopen.bmj.com/site/about/guidelines.xhtml>

Page 2 of 2

46

47



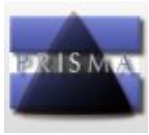

## PRISMA 2009 Flow Diagram

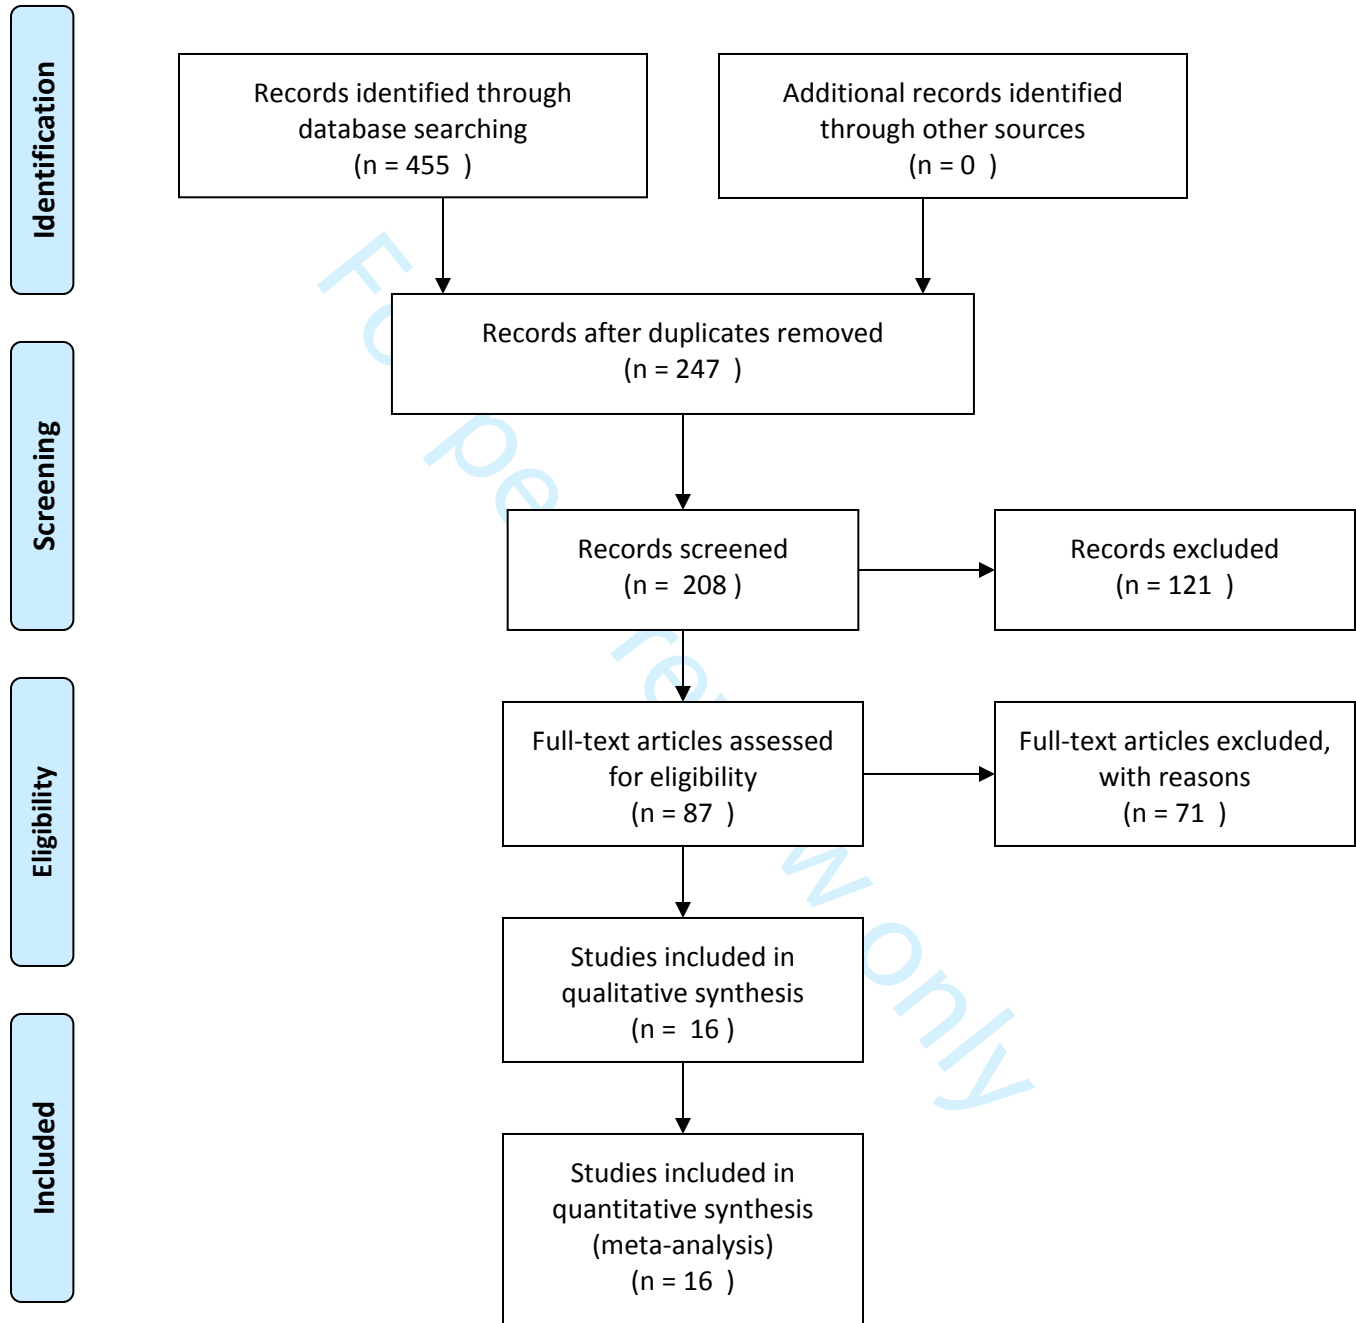

From: Moher D, Liberati A, Tetzlaff J, Altman DG, The PRISMA Group (2009). Preferred Reporting Items for Systematic Reviews and Meta-Analyses: The PRISMA Statement. PLoS Med 6(7): e1000097. doi:10.1371/journal.pmed1000097

For more information, visit [www.prisma-statement.org](http://www.prisma-statement.org).

For peer review only - <http://bmjopen.bmj.com/site/about/guidelines.xhtml>

# BMJ Open

## Turnover intention among primary health workers in China: a systematic review and meta-analysis

|                                 |                                                                                                                                                                                                                                                                                                                                                                                                                                                                                                                                                                                                                                                                                                                                                                                                                                                                                                                                                                                                                                                                                                                                                 |
|---------------------------------|-------------------------------------------------------------------------------------------------------------------------------------------------------------------------------------------------------------------------------------------------------------------------------------------------------------------------------------------------------------------------------------------------------------------------------------------------------------------------------------------------------------------------------------------------------------------------------------------------------------------------------------------------------------------------------------------------------------------------------------------------------------------------------------------------------------------------------------------------------------------------------------------------------------------------------------------------------------------------------------------------------------------------------------------------------------------------------------------------------------------------------------------------|
| Journal:                        | <i>BMJ Open</i>                                                                                                                                                                                                                                                                                                                                                                                                                                                                                                                                                                                                                                                                                                                                                                                                                                                                                                                                                                                                                                                                                                                                 |
| Manuscript ID                   | bmjopen-2020-037117.R1                                                                                                                                                                                                                                                                                                                                                                                                                                                                                                                                                                                                                                                                                                                                                                                                                                                                                                                                                                                                                                                                                                                          |
| Article Type:                   | Original research                                                                                                                                                                                                                                                                                                                                                                                                                                                                                                                                                                                                                                                                                                                                                                                                                                                                                                                                                                                                                                                                                                                               |
| Date Submitted by the Author:   | 09-Jul-2020                                                                                                                                                                                                                                                                                                                                                                                                                                                                                                                                                                                                                                                                                                                                                                                                                                                                                                                                                                                                                                                                                                                                     |
| Complete List of Authors:       | He, Rongxin; Xi'an Jiaotong University School of Public Policy and Administration; Xi'an Jiaotong University, Research Center for the Belt and Road Health Policy and Health Technology Assessment<br>Liu, Jinlin; Xi'an Jiaotong University School of Public Policy and Administration; Xi'an Jiaotong University, Research Center for the Belt and Road Health Policy and Health Technology Assessment<br>Zhang, WeiHong; Ghent University Faculty of Medicine and Health Sciences, International Centre for Reproductive Health<br>Zhu, Bin; Xi'an Jiaotong University School of Public Policy and Administration; Xi'an Jiaotong University, Research Center for the Belt and Road Health Policy and Health Technology Assessment<br>Zhang, Ning; Xi'an Jiaotong University School of Public Policy and Administration; Xi'an Jiaotong University, Research Center for the Belt and Road Health Policy and Health Technology Assessment<br>Mao, Ying; Xi'an Jiaotong University School of Public Policy and Administration; Xi'an Jiaotong University, Research Center for the Belt and Road Health Policy and Health Technology Assessment |
| <b>Primary Subject Heading</b>: | Health policy                                                                                                                                                                                                                                                                                                                                                                                                                                                                                                                                                                                                                                                                                                                                                                                                                                                                                                                                                                                                                                                                                                                                   |
| Secondary Subject Heading:      | Public health, Health economics, Health services research                                                                                                                                                                                                                                                                                                                                                                                                                                                                                                                                                                                                                                                                                                                                                                                                                                                                                                                                                                                                                                                                                       |
| Keywords:                       | PRIMARY CARE, Human resource management < HEALTH SERVICES ADMINISTRATION & MANAGEMENT, Health policy < HEALTH SERVICES ADMINISTRATION & MANAGEMENT, HEALTH SERVICES ADMINISTRATION & MANAGEMENT                                                                                                                                                                                                                                                                                                                                                                                                                                                                                                                                                                                                                                                                                                                                                                                                                                                                                                                                                 |
|                                 |                                                                                                                                                                                                                                                                                                                                                                                                                                                                                                                                                                                                                                                                                                                                                                                                                                                                                                                                                                                                                                                                                                                                                 |

SCHOLARONE™  
Manuscripts



I, the Submitting Author has the right to grant and does grant on behalf of all authors of the Work (as defined in the below author licence), an exclusive licence and/or a non-exclusive licence for contributions from authors who are: i) UK Crown employees; ii) where BMJ has agreed a CC-BY licence shall apply, and/or iii) in accordance with the terms applicable for US Federal Government officers or employees acting as part of their official duties; on a worldwide, perpetual, irrevocable, royalty-free basis to BMJ Publishing Group Ltd ("BMJ") its licensees and where the relevant Journal is co-owned by BMJ to the co-owners of the Journal, to publish the Work in this journal and any other BMJ products and to exploit all rights, as set out in our [licence](#).

The Submitting Author accepts and understands that any supply made under these terms is made by BMJ to the Submitting Author unless you are acting as an employee on behalf of your employer or a postgraduate student of an affiliated institution which is paying any applicable article publishing charge ("APC") for Open Access articles. Where the Submitting Author wishes to make the Work available on an Open Access basis (and intends to pay the relevant APC), the terms of reuse of such Open Access shall be governed by a Creative Commons licence – details of these licences and which [Creative Commons](#) licence will apply to this Work are set out in our licence referred to above.

Other than as permitted in any relevant BMJ Author's Self Archiving Policies, I confirm this Work has not been accepted for publication elsewhere, is not being considered for publication elsewhere and does not duplicate material already published. I confirm all authors consent to publication of this Work and authorise the granting of this licence.

# Turnover intention among primary health workers in China: a systematic review and meta-analysis

Rongxin He<sup>1,2</sup>, Jinlin Liu<sup>1,2,5</sup>, Zhang Wei-Hong<sup>3</sup>, Bin Zhu<sup>1,2,4</sup>, Ning Zhang<sup>1,2</sup>, Ying Mao<sup>1,2\*</sup>

<sup>1</sup> School of Public Policy and Administration, Xi'an Jiaotong University, 28 Xianning West Road, Xi'an 710049, China; herongxin@stu.xjtu.edu.cn (R.H.); zhangningati@stu.xjtu.edu.cn (N.Z.)

<sup>2</sup> Research Center for the Belt and Road Health Policy and Health Technology Assessment, Xi'an Jiaotong University, 28 Xianning West Road, Xi'an 710049, China

<sup>3</sup> International Centre for Reproductive Health (ICRH), Ghent University, Ghent, Belgium; WeiHong.Zhang@UGent.be (Z.W.)

<sup>4</sup> Department of Public Policy, City University of Hong Kong, Hong Kong, 999077, China; binzhu2-c@my.cityu.edu.hk (B.Z.)

<sup>5</sup> Walter H. Shorenstein Asia-Pacific Research Center, Stanford University, Stanford, California 94305, USA; liujinlin\_xjtu@163.com (J.L.)

\* Correspondence: Ying Mao. Email: mao\_ying@mail.xjtu.edu.cn; Tel.: +86-029-8266-5482

## Abstract

**Objectives** To analyse the prevalence and determinants of turnover intention among primary health workers (PHWs) in China to provide evidence for improving retention measures.

**Design** Systemic review and meta-analysis.

**Data sources** Four English language databases (PubMed, EMBASE, Cochrane Library, PsycINFO) and three Chinese databases (CNKI, CSPD, CBM) were searched up to October 2019.

**Eligibility criteria** Eligible studies were observational or descriptive studies conducted in mainland China. The prevalence of turnover intention among health workers and related factors had to be explicitly reported in each included study.

**Data extraction and synthesis** Data were extracted by one author and reviewed independently by two other authors. For each factor analysed by a meta-analysis, the factor was required to be the same across different studies, and at least three studies had to include it. The quality of studies was assessed using the Newcastle–Ottawa scale and heterogeneity was evaluated using the  $I^2$  statistic.

**Results:** We identified 16 cross-sectional studies investigating a total of 37,672 primary health workers. The prevalence of turnover intention was 30.4%. Subgroup analysis revealed that the highest prevalence was observed in the community primary health care institutions and the eastern provinces of China. Meta-analyses indicated that 21 factors were significantly associated with turnover intention, including demographic factors (gender, age, education, marital status), job characteristic factors (title, work seniority, remuneration, social status, organizational affiliation, work stress) and job satisfaction factors (learning and training opportunity, interpersonal relationship, work condition and environment and so on).

**Conclusion:** This study highlights the problem of turnover intention among PHWs in China. Efforts should be made to improve conditions in both work-related areas and areas outside of work. Policymakers should continue to improve reward systems, the construction of infrastructure, and promotion systems and pay more attention to PHWs' lives outside of work and meet their living needs.

### Strengths and limitations of this study

- 1) This systematic review provides supplemental evidence from China to global studies on the turnover intention of primary health workers.
- 2) Meta-analysis and narrative analysis are performed to identify the risk factors for turnover intention among primary health workers.
- 3) Due to the limitation and shortage of the current studies, significant heterogeneity among the individual studies evident after the subgroup analysis and part of the meta-analysis are performed.

## Introduction

Primary health care (PHC) addresses the majority of a person's health needs throughout their lifetime. The declaration of Astana declared that strengthening PHC is the most inclusive, effective and efficient approach to enhance people's physical and mental health and social well-being.[1] Primary health workers (PHWs) are direct providers of PHC, and their quantity directly determines the quantity, quality and outcomes of PHC.[2] These services should be provided with compassion, respect and dignity by health professionals who are well-trained, skilled, motivated and committed.[1] However, primary health institutions are facing significant labour shortages worldwide,[3] not only in low- and middle-income countries[2,4,5] but also in developed countries.[6,7] In China, PHC services including basic medical and public health services, are provided by community health centres and stations in urban areas and by township health centres and village clinics in rural areas.[8] These four types of PHC institutions constitute the essential part of China's three-tertiary health care delivery network. PHWs working inside include doctors, nurses, public health workers and administrative staff, most of them have to play multiple roles. Currently, PHC institutions are all facing the problem of staff turnover, aggravating the shortage of the health workforce[9], which has become one of the significant obstacles to strengthening China's primary healthcare services.[10]

Turnover, a behavior of actually leaving, was an important value in human resources management and maintenance of the current workforce[11]. Turnover intention (TI) is defined as the probability that an employee will leave his or her job within a specific period;[12] TI is considered to one of the best predictors of turnover behaviour.[13–16] Previous studies have explored the factors that influence the turnover intentions of PHWs. A variety of factors have been identified, such as demographic factors,[7,17–22] job satisfaction,[18,20,22–25] work stress,[13,18,25] burnout,[23,26] quality of work-life,[21] interpersonal communication,[27] and violence from patients.[28] While these factors have been definitely linked with TI, some researchers have focused on factors outside of work. Han et al.[29] found that key factors of community integration influence overseas-trained doctors' decision to stay in or leave a rural community in Australia; Stewart et al.[17] reported that community satisfaction is a crucial predictor of intent to leave among rural and remote registered nurses in Canada; and Chao et al. and Lu et al.[12,13] demonstrated that there is a significant correlation between work-family conflict and the TI of PHWs in Taiwan and Guangdong.

In China, many empirical studies have been conducted. However, there is no consistent conclusion on the prevalence and determinates of TI among PHWs in China. Furthermore, most of them were published in Chinese, only a few studies on TI and risk factors for PHWs have been published in international journals, and no related systematic reviews have been found in either Chinese or

English. Therefore, this study aims to examine the prevalence of TI and identify the related factors among PHWs in China by conducting a systemic review and meta-analysis.

## Method

### Literature search

This systematic review and meta-analysis were performed following the PRISMA guidelines.[30,31] A systematic search of the literature was conducted up to October 2019 using four English language databases (PubMed, EMBASE, Cochrane Library, PsycINFO) and three Chinese databases (CNKI, CSPD and CBM). No limits were applied for language and publication dates of coverage. The search strategy was based on a combination of "(Turnover Intention, or Departure Intention, or Demission Intention, or Leave Intention, or intent to leave), AND (Primary, Community, Rural, Countryside, District, Basic, Fundamental or Grassroots), AND (Health worker, Health officer, Health Manpower, Health Personnel, Medical Personnel, Medical worker, Medical staff, Doctor, Physician, or Nurse) and (China, or Chinese)". References of the retrieved studies were also checked and screened. The full search strategy can be found in the Supplementary Tables S1.

### Study eligibility

Eligible studies were published studies that reported the prevalence and related determinants of TI among Chinese PHWs. The eligibility criteria included the following: (1) types of studies: original cross-sectional studies (those presenting non-original data, such as reviews, editorials, opinion papers, or letters to the editor, were excluded); (2) types of participants: Chinese PHWs; (3) types of risk factor: demographic factors, job characteristic factors and job satisfaction factors. (4) types of outcome measures: the prevalence of TI and related factors reported in the study.

Eligibility assessment was conducted to screen the titles, abstracts and full texts of the identified studies by two reviewers independently. Disagreements on which studies should be included or excluded were resolved by full group consensus.

### Data extraction

A piloted form referred to the Cochrane Effective Practice and Organization of Care Review Group (EPOC) data collection checklist,[32] was used to extract relevant data from the included full-text studies. The following data were extracted: author, publication year, location where the study was carried out, participants, sample size, number of cases, assessment tools, prevalence of TI and related factors. Data extraction was conducted by one author and reviewed independently by two other authors, with disagreements resolved by discussion until consensus was reached. The inter-rater reliability for title screening between two authors was 96.15%, and for abstract screening was 94.74%. The full inter-rater reliability result can be found in the Supplementary Tables S2.

### Quality assessment

The quality of studies was assessed using a modified Newcastle-Ottawa Scale[33], as recommended by the Cochrane Collaboration[34]. Studies received scores based on the design-specific sources of

1  
2  
3 bias, methods for selecting participants, exposure measures, outcome variables and methods to  
4 control confounders[35]. The total score was 7 points, and all the included studies were grouped  
5 according to their scores, which were categorized as good (6–7), moderate (3–5) and poor (1–2).  
6 Specifically, a study with a sample size of less than 1000 was regarded as having poor  
7 representativeness of the sample (score = 0, otherwise = 1); a cross-sectional study with a response  
8 rate lower than 80% or without reporting a response rate was considered a poor-quality study (score  
9 = 0, otherwise = 1). Meanwhile, if statistical methods used in the study was exact, we considered  
10 statistical test to be appropriate (score = 1, otherwise = 0), even if there was no further multivariate  
11 analysis. Three authors independently scored all included studied, with disagreements resolved by  
12 discussion until consensus was reached.

### 13 **Data synthesis and statistical analysis**

14 The primary outcome in this review was the difference in the prevalence or relative risk of TI among  
15 different groups. The prevalence of TI was estimated as the total number of TI cases divided by the  
16 total number of PHWs participating in the study. It was assessed via single-arm analysis. We  
17 compared the difference in TI between PHWs from different regions and institutions by subgroup  
18 analyses. The secondary outcome of this study was the association between factors and TI among  
19 PHWs in the form of the odds ratio. Each factor analysed by a meta-analysis, required related  
20 variables in the questionnaire to be the same in different studies, which meant that it was feasible to  
21 merge the factor into two groups; meanwhile, at least three studies related to each factor had to be  
22 included in the meta-analysis. When the meta-analysis was performed, the significance of the pooled  
23 odds ratio (OR) was determined by the Z-test. Heterogeneity was estimated by the Q statistic and  
24 evaluated using the  $I^2$  statistic.[36] A fixed-effect model was used to compute the summary risk  
25 estimate if there was no heterogeneity among the studies, whereas a random-effects model was used  
26 when heterogeneity existed ( $I^2 \geq 50\%$ ).[37] Publication bias was evaluated using Egger's test. All  
27 statistical analyses were performed using Stata V13.0 and RevMan V5.3. A two-tailed p value of  
28  $<0.05$  was considered to be statistically significant. We referred to the Meta-analysis of  
29 Observational Studies in Epidemiology (MOOSE) guideline.[38] If it was infeasible to make a  
30 quantitative synthesis and conduct a meta-analysis, a narrative approach and descriptive statistics  
31 were used by grouping studies that reported the same factors, and to compare their associations with  
32 the TI of PHWs.

### 33 **Patient and public involvement**

34 Patients and the public were not involved in this study.

### 35 **Results**

36 A total of 455 records were identified through our initial database search (PubMed: 13, Embase: 14,  
37 Coherence: 6, PsycINFO: 0, CNKI: 124, WAN FANG Data: 270, CBM: 28). After duplicate records  
38  
39  
40  
41  
42  
43  
44  
45  
46  
47  
48  
49



1  
2  
3 were removed, 208 records were screened based on title and abstract. Eighty-seven articles were  
4 included in the full-text review. Among these, 63 articles were eliminated due to a lack of original  
5 data. Three articles were eliminated due to the inappropriate study designs. Five articles were  
6 excluded because of missing data on risk factors for TI. Ultimately, 16 studies were included in this  
7 study. No additional studies were obtained after the references of all 16 retrieved articles were  
8 checked. The study selection process is shown in Figure 1.  
9  
10  
11  
12  
13

14  
15  
16  
17  
18  
19  
20  
21  
22  
23  
24  
25  
26  
27  
28  
29  
30  
31  
32  
33  
34  
35  
36  
37  
38  
39  
40  
41  
42  
43  
44  
45  
46  
47  
48  
49  
50  
51  
52  
53  
54  
55  
56  
57  
58  
59  
60

Figure 1 Flow diagram of the study selection

### Study characteristics

Table 1 presents the main characteristics of all 16 studies. These studies were all cross-sectional and performed in 24 provinces of China between 2011 and 2019. The selected studies included 37,672 participants, with a median sample size of 1073 (range 127–16,157). Five studies were conducted in eastern China,[39–43] four in central provinces,[19,44–46] and four in the western region.[18,47–49] Four studies were conducted in urban areas,[39,40,44,50] eight in rural areas,[18,19,42,46–49,51] and four in both areas.[41,43,45,52] Thirteen studies used a dichotomous question to measure TI (Do you want to leave your job? Yes/No), and three studies used scales. All studies reported the prevalence and related factors of TI among PHWs.

Table 1 Characteristics of 16 included studies

| Authors     | Location                | Research sites                 | Sample size (Qualified rate %) | TI assessment tool                                            | Prevalence of TI, N (%)                                                    | Ref. No. |
|-------------|-------------------------|--------------------------------|--------------------------------|---------------------------------------------------------------|----------------------------------------------------------------------------|----------|
| Xu,2012     | Anhui                   | City community                 | 1109(92.96%)                   | Dichotomous question                                          | 224 persons (20.2%)                                                        | 5        |
| Gu,2012     | Shanghai,               | City community                 | 127(86.99%)                    | Dichotomous question                                          | 69 persons (56.69%)                                                        | 7        |
| Yao,2011    | Guangdong               | City community                 | 335(95.7%)                     | Dichotomous question                                          | 178 persons (52.0%)                                                        | 13       |
| Lu,2018     | Shandong                | Rural area (village)           | 1037(98.57%)                   | The Self-made 10items 5-point Likert Turnover intention Scale | 498 persons (48.02%)<br>(Score of > 32 out of 50 means turnover intention) | 15       |
| Ou,2018     | Guangdong               | City community and Rural area  | 1252(87.43%)                   | Frah Turnover intention Scale                                 | 227 persons (18. 13%)<br>(Score of > 3 out of 5)                           | 17       |
| Xu,2015     | Guizhou                 | Rural area (township)          | 704(96.6%)                     | Dichotomous question                                          | 247 persons (35.10%)                                                       | 19       |
| Liu,2019    | Not Stated              | City community and Rural area  | 16157(100.00%)                 | Dichotomous question                                          | 1858 persons (11.50%)                                                      | 33       |
| Zhang,2013  | Shaanxi                 | Rural area (township)          | 425(99.53%)                    | Dichotomous question                                          | 34 persons (8.00%)                                                         | 39       |
| Liu,2017    | Shanghai                | City community and Rural area  | 3295(86.70%)                   | Dichotomous question                                          | 520 persons (15.80%)                                                       | 49       |
| Shen,2018   | 8 central provinces*    | Rural area (village)           | 1669 (100.00%)                 | Dichotomous question                                          | 568 persons (34.03%)                                                       | 54       |
| Zhou,2016   | Wuhan                   | City community and Rural area  | 755 (83.90%)                   | Michael & Spector Turnover intention Scale                    | 278 persons (36.86%)<br>(Score of > 3 out of 5)                            | 55       |
| Zhang,2015  | Shandong, Anhui, Shanxi | Rural area (township)          | 167(100.00%)                   | Dichotomous question                                          | 49 persons (29. 34%)                                                       | 63       |
| Wan,2013    | Yunnan                  | Rural area (township & county) | 493(94.80%)                    | Dichotomous question                                          | 101 persons (29. 34%)                                                      | 70       |
| Fang,2014   | Hubei                   | Rural area (village)           | 1889(97.88%)                   | Dichotomous question                                          | 695 persons (36.8%)                                                        | 76       |
| Sun,2013    | 5 provinces*            | City community                 | 3212(99.32%)                   | Dichotomous question                                          | 1243 persons (38.7%)                                                       | 79       |
| Liu JL,2019 | 11 western provinces*   | Rural area (township & county) | 5046(90.4%0%)                  | Dichotomous question                                          | 1468 persons (29.1%)                                                       | 86       |

\*8 provinces: Shanxi, Jilin, Heilongjiang, Anhui, Jiangxi, Henan, Hubei and Hunan, 5 provinces: Zhejiang, Guangdong, Guizhou, Hebei, and Hubei; 11 provinces: Gansu, Guangxi, Guizhou, Inner Mongolia, Ningxia, Qinghai, Shaanxi, Sichuan, Tibet, Xinjiang, and Yunnan.

Forty-seven factors were extracted from 16 included studies (Supplementary Tables S3). It included three groups: 7 demographic factors, 22 job characteristic factors, and 18 job satisfaction factors. The average quality score of the 16 included studies was 5.25 of 7 points, indicating a moderate research quality, according to the modified Newcastle-Ottawa scale (Supplementary Tables S4). All studies were of the medium and high quality.

### Prevalence of turnover intention among PHWs

Table 2 shows the prevalence of turnover intention among PHWs in China. The pooled prevalence was 30.4%. The highest prevalence was 54.3% reported by Gu et al.[39], whereas Zhang reported the lowest prevalence of 8.0%.[49] The subgroup analysis by region showed that, the highest prevalence was observed in the eastern China (37.6%), followed by central regions (31.9%) and western regions (23.2%). According to work setting, the highest prevalence occurred among PHWs working in the community, followed by rural PHWs working in townships and villages. With respect to sample size, the prevalence of TI was higher in studies having a sample size <1037 (35.5%) than in those with a sample size  $\geq 1037$  (25.5%). High heterogeneity was observed across the included studies due to the inconsistent research sites, regions and objects.

Table 2 Prevalence of turnover intention among PHWs in China

| Variables        | Characteristic    | Included studies | Prevalence (95%CI)  | Q test (I <sup>2</sup> ) |
|------------------|-------------------|------------------|---------------------|--------------------------|
| Overall          |                   | 16               | 0.304[0.240, 0.367] | 99.5%                    |
| By region        | East              | 5                | 0.376[0.231, 0.521] | 99.3%                    |
|                  | Central           | 4                | 0.319[0.239, 0.399] | 97.6%                    |
|                  | West              | 4                | 0.232[0.119, 0.345] | 98.8%                    |
| By research site | Work in village   | 3                | 0.395[0.321, 0.470] | 96.3%                    |
|                  | Work in township  | 5                | 0.234[0.144, 0.342] | 98.4%                    |
|                  | Work in community | 4                | 0.412[0.274, 0.551] | 98.7%                    |
| By sample size   | <1037             | 8                | 0.355[0.232, 0.478] | 99.7%                    |
|                  | $\geq 1037$       | 8                | 0.255[0.174, 0.337] | 98.8%                    |

### Factors related to turnover intention among PHWs

All studies reported demographic factors or job characteristic factors and determined their associations with the TI of PHWs. Moreover, six studies explored the effects of job satisfaction factors,[19,42,45–48] and nineteen factors were feasible for inclusion in the meta-analyses. Egger's linear regression tests on a natural logarithm scale of OR found no evidence of publication bias for the studies included in meta-analyses (Supplementary Tables S5).

### Demographic factors and turnover intention

The meta-analysis of demographic factors was based on 15 cross-sectional studies (Figure 2). Gender (male vs. female: OR:1.23),[18,19,48,50,52,40–47] age (younger vs. older: OR: 1.47),[40,41,44,48–50,52] and marriage status (unmarried vs. married, OR: 1.16)[18,41,43–

45,47,48] were significantly associated with TI in PHWs, which showed that the PHWs with higher risks of TI were male, were younger, had a higher education, were unmarried, and worked in the remote region. But education (low-education vs. high-education: OR:0.78).[18,19,41,43–46,48–50] was not statistically significant.

Figure 2 Forest plots of demographic factors

#### **Job characteristic factors and turnover intention**

Job characteristic factors were examined in nine studies (Figure 3). Job title (low-title vs. high-title: OR: 1.11),[18,40,41,43–46,48,50] work seniority (short vs. long: OR: 1.17),[40,46,49,50] organizational affiliation (strength vs. others: OR: 0.85),[41,44,52] and work stress (high vs. low: OR: 3.14)[43,45,47,48,52] were significantly associated with the TI of PHWs, which presented that the PHWs with higher risks of TI were those with shorter work seniority, higher work stress, and longer working hours. However, occupation (doctor vs. nurse: OR:1.05)[40,41,43,44,50] was not statistically significant.

Figure 3 Forest plots of job characteristic factors

#### **Job satisfaction factors and turnover intention**

Six studies explored the association between job satisfaction factors and turnover intention (Figure 4). Overall job satisfaction (satisfied vs. dissatisfied: OR: 0.15),[39,42,45] promotion and individual development space (satisfied vs. dissatisfied: OR: 0.19),[19,47,48] interpersonal relationships (satisfied vs dissatisfied: OR: 0.20),[19,47,48] keep busy and fulfilling (satisfied vs dissatisfied: OR: 0.39),[19,42,47,48] sense of accomplishment (satisfied vs dissatisfied: OR:0.16),[19,42,47] income satisfaction (satisfied vs dissatisfied: OR: 0.33),[19,42,46–48] work condition and environment (satisfied vs dissatisfied: OR: 0.19),[19,42,47,48] level of attention by leaders (satisfied vs dissatisfied: OR: 0.20),[19,47,48] the competence of my manager in making decisions (satisfied vs dissatisfied: OR: 0.18),[19,47,48] and motivation and salary system (satisfied vs dissatisfied: OR: 0.21)[45,47,48] were significantly associated with the TI of PHWs. The results showed that PHWs who dissatisfied their job had significantly higher risks of TI.

Figure 4 Forest plots of job satisfaction factors

The remaining twenty-eight exposures were analysed for their associations with the TI of PHWs under a narrative approach. In the demographic factors group, PHWs who work in remote regions[41] and who have lower remuneration [18,47,52] and social status[42,47,48] were found to have significantly higher risks of TI. No significant associations were found between TI and the nation.[46,47] In addition, the associations between TI and major in clinical medicine are inconclusive.[46,47]

1  
2  
3  
4 Among job characteristic factors, seven were significantly associated with high risks of TI,  
5 including lower individual remuneration levels at the local level,[19,42] more severe emotional  
6 exhaustion,[42,46] more severe flattening of affect,[46] more participation in public health  
7 service,[51] longer working hours,[47] no career planning,[47] and lack of insurance.[46] No  
8 significant associations were found between TI and qualified to practice,[19] re-employ after  
9 retirement,[48] turnover experience,[47] career identity,[47] influence on family life,[50] patient  
10 trust.[47] In addition, the associations between TI and living condition is inconclusive.[47,48]

11  
12  
13  
14 Regarding job satisfaction factors, PHWs who are unsatisfied with work stability,[19,47] the chance  
15 to try their own methods of performing their job,[19] the chance to do something that makes use of  
16 their abilities,[19,47] work support,[42,48] policies practice,[19,45,47] and income fairness[45,47]  
17 were found to have significantly high risks of TI. However, no statistically significant associations  
18 were found between TI and the satisfaction with the scientific research atmosphere or learning and  
19 training opportunity.[46–48]

## 20 21 22 23 **Discussion**

### 24 25 **Principal findings**

26  
27 This systematic review presents an overall prevalence of TI (30.4%) among Chinese PHWs which  
28 indicated that three of ten PHWs have TI. However, this finding is almost two times higher than  
29 that of some high-income countries. A study conducted in England showed that only 11.8% of  
30 primary care doctors had high turnover intention.[53] A survey including 23,159 nurses from 10  
31 European countries showed that 9% of all these nurses intended to leave their profession, varying  
32 from 5% to 17% among countries[54] Another survey performed among 2,263 physicians in  
33 America reported that 18.4% of them intended to leave their practice.[55] A study conducted in  
34 Canada reported that 17.2% of registered nurses intended to leave their current nursing position.[17]  
35  
36 Meanwhile, the prevalence of TI was lower than in some low- and middle-income countries, such  
37 as Ghana,[20] Iraq, [56] South Africa,[22] and the Philippines.[57]

38  
39 The subgroup analysis indicated the variation in the prevalence of TI among regions. The possible  
40 explanations for this variation might be the difference in the level of social and economic  
41 development and the workplace. In East China, there are more urban hospitals than in other regions,  
42 providing more jobs, higher pay and a better work environment. It attracts many PHWs to move  
43 away from primary care practice.[58] As rural PHWs, they usually settled down in rural areas,  
44 lacking access to urban hospitals compared to peers in the urban community.

45  
46 This study extracted a broad scope of forty-seven related factors and determined their associations  
47 with the TI of PHWs, identifying a total of thirty-one demographic, job characteristic and job  
48 satisfaction risk factors.

49  
50 Five demographic risk factors were determined to have significant associations with the TI of PHWs,  
51 which showed that the PHWs who were male, were younger, had a higher education, were  
52  
53  
54  
55  
56  
57  
58  
59  
60

1  
2  
3 unmarried, and worked in the remote region with high risks of TI. Some of these findings are in line  
4 with studies performed in South Africa, the Philippines, Canada, Saudi Arabia, Ghana and the  
5 Netherlands.[17,20–22,25,57] However, Bonenberger et al.[20] and Labrague et al.[57] showed that  
6 the association between gender and the TI of PHWs was not statistically significant. It can be  
7 concluded that different types of PHWs have unique characteristics of TI. Accordingly, we can sum  
8 up the high-risk population among PHWs. For example, the turnover intentions of an unmarried  
9 young practitioner who received full medical training could be expected to be higher than a married  
10 older practitioner with limited training. The policymakers and medical institutions managers should  
11 formulate or adjust retention measures based on these characteristics.

12  
13 According to job characteristic factors, we concluded that PHWs who less shorter work seniority,  
14 higher work stress, and longer working hours had significantly higher risks of TI. All of these  
15 findings are consistent with prior studies. Nevertheless, some findings are inconsistent with prior  
16 studies. Remuneration was found to be statistically significant in the review, which is consistent  
17 with Almalki et al.,[21] but Labrague et al.[57] reported an insignificant association between  
18 remuneration and TI. Occupation, and level of the medical institution were not significantly  
19 associated with TI in the review, in accordance with Warmelink et al.[25] and Labrague et al.[57]  
20 However, some studies reported the opposite results.[17,20] In addition, seven factors identified in  
21 the review were never or rarely reported in other countries, including title, social status, participation  
22 in public health service, insurance, career planning, emotional exhaustion or flattening of affect and  
23 authorized personnel, which were found to have significant associations with a high risk of TI  
24 among PHWs in China. Among these factors, “emotional exhaustion” and “flattening of affect” are  
25 measures of mental health status. In recent years, the mental health status of the health workforce  
26 has deteriorated due to increasing work stress and violence.[59,60] Some studies also found that  
27 mental health has significant associations with job satisfaction and job burnout.[18,26,61] In the  
28 context of COVID-19, all PHWs have been mobilized to fight the epidemic, which will  
29 undoubtedly have a negative impact on their mental health status.[62,63] The risk of TIs caused  
30 by mental health problems cannot be ignored.

31  
32 There is a significant inverse association between job satisfaction and TI. In this review, we found  
33 that low overall job satisfaction reported significantly higher risks of TI among PHWs, which is in  
34 line with Bonenberger et al.,[20] Warmelink et al.[25] and Delobelle et al.[22] Furthermore, most  
35 of the job satisfaction factors are also significantly associated with the TI of PHWs. However, these  
36 specific job satisfaction factors have rarely been reported in previous studies.

37  
38 Notably, compared with previous studies focused on the family factors,[17,21] our study did not  
39 find relevant evidence on family factors in China such as: community satisfaction, numbers of  
40 dependent family members, or family commitments.

#### 41 42 43 44 45 46 47 48 49 50 51 52 53 54 55 56 57 58 **Limitations and strengths**

To our knowledge, this is the first systematic review (including meta-analysis) to determine potential risk factors for TI among Chinese PHWs. Our findings present an overview of the current evidence from mainland China. One strength of this review is that it estimated the prevalence of TI among Chinese PHWs based on a large sample size with a total of 16 cross-sectional studies and 37,672 participants. Another strength is that it determines the associations of a broad scope of potential risk factors. Limitations exist in this systematic review. Significant heterogeneity among the individual studies was found when the subgroup analysis and the part of meta-analysis were performed. The main reason is the heterogeneity between different studies in research region and research site. Due to the limitation and shortage of the current studies, it is hard to conduct a further study.

### **Literature Gaps**

Therefore, it can be concluded that there are many facets of the TIs among PHWs that need to be explored. First, the differences in TI by occupation within the different regions or institutions need to be explored. Second, there is insufficient research on the interaction effects of demographics and other factors. More research is needed to better represent and understand how two or more determinants work together to impact the TIs of PHWs. Third, the impact of family factors on TIs requires more attention. Last but not least, the relationship between public health services and the TIs of PHWs in the context of the COVID-19 is a worthy research issue.

### **Conclusion**

The analysis highlights the problem of turnover intentions among PHWs in China. There is a significant association between demographic factors, job characteristic factors, job satisfaction factors and turnover intentions. Policymakers should take into account all aspects of human needs that influence PHWs' intentions to stay. As illustrated by the Global Strategy on Human Resources for Health, it is particularly important to find pragmatic solutions to overcome deeply entrenched rigidities in public sector rules and practices that hinder the adoption of adequate reward systems, working conditions and career structures for health workers, with appropriate levels of flexibility and autonomy. [64] Therefore, efforts can be made to improve factors both at work and outside of work. In terms of work factors, policymakers should continue to improve reward systems, the construction of infrastructure, and promotion systems. Outside of work, authorities should pay more attention to PHWs' lives and meet their living needs to increase their willingness to work and live in communities, towns and villages. We also suggest that particular attention be given to PHWs working in the community or the eastern region of China to reduce their turnover intentions by implementing evidence-based health workforce policies.

### **Funding**

This research was funded by the Major Project of National Social Science Fund of China: Research on big health putting prevention first and construction of healthy China (grant number 17ZDA079).

### Contributors

Rongxin He and Ying Mao conceived this research project. Jinlin Liu and Rongxin He developed the search strategy and Rongxin He searched the databases. Jinlin Liu, Bin Zhu, Zhangning and Rongxin He selected the studies. Rongxin He designed and executed the analyses, interpreted the findings, wrote the first draft, revised subsequent drafts, and prepared the manuscript. Ying Mao and Zhang Wei-Hong revised drafts of the manuscript.

### Competing interests

The authors declare that they have no competing interests.

### Data availability

All data relevant to the study are included in the article or uploaded as supplementary information. No additional data are available from the authors.

### Reference

- 1 WHO; UNICEF; HIS; SDS. Declaration of Astana. *Global Conference on Primary Health Care* 2018.
- 2 Espinosa-González AB, Normand C. Challenges in the implementation of primary health care reforms: a qualitative analysis of stakeholders' views in Turkey. *BMJ Open* 2019;**9**:e027492. doi:10.1136/bmjopen-2018-027492
- 3 Truth U. GHWA-a\_universal\_truth\_report.
- 4 Nkomazana O, Mash R, Shaibu S, *et al.* Stakeholders' perceptions on shortage of healthcare workers in primary healthcare in Botswana: Focus group discussions. *PLoS ONE* 2015;**10**:1–15. doi:10.1371/journal.pone.0135846
- 5 Aluko JO, Anthea R, Marie Modeste RR. Manpower capacity and reasons for staff shortage in primary health care maternity centres in Nigeria: a mixed-methods study. *BMC Health Services Research* 2019;**19**:1–15. doi:10.1186/s12913-018-3819-x
- 6 MacLean L, Hassmiller S, Shaffer F, *et al.* Scale, Causes, and Implications of the Primary Care Nursing Shortage. *Annual Review of Public Health* 2014;**35**:443–57. doi:10.1146/annurev-publhealth-032013-182508
- 7 Gan Y, Gong Y, Chen Y, *et al.* Turnover intention and related factors among general practitioners in Hubei, China: A cross-sectional study. *BMC Family Practice* 2018;**19**:1–9. doi:10.1186/s12875-018-0752-3
- 8 Li H, Yuan B, Wang D, *et al.* Motivating factors on performance of primary care workers in China: a systematic review and meta-analysis. *BMJ open* 2019;**9**:e028619. doi:10.1136/bmjopen-2018-028619
- 9 Wu J, Yang Y. Inequality trends in the demographic and geographic distribution of health care professionals in China: Data from 2002 to 2016. *International Journal of Health Planning and Management* 2019;**34**:e487–508. doi:10.1002/hpm.2664
- 10 Yip WCM, Hsiao WC, Chen W, *et al.* Early appraisal of China's huge and complex health-care reforms. *The Lancet* 2012;**379**:833–42. doi:10.1016/S0140-6736(11)61880-1
- 11 Nancarrow S, Bradbury J, Pit SW, *et al.* Intention to stay and intention to leave: Are they two sides of the same coin? A cross-sectional structural equation modelling study among health and social care workers. *Journal of Occupational Health* 2014;**56**:292–300. doi:10.1539/joh.14-0027-OA
- 12 Lu Y, Hu X-M, Huang X-L, *et al.* The relationship between job satisfaction, work stress, work–family conflict, and turnover intention among physicians in Guangdong, China: a cross-sectional study. *BMJ Open* 2017;**7**:e014894. doi:10.1136/bmjopen-2016-014894



- 1  
2  
3 13 Chao M-C, Jou R-C, Liao C-C, *et al.* Workplace Stress, Job Satisfaction, Job Performance, and  
4 Turnover Intention of Health Care Workers in Rural Taiwan. *Asia Pacific Journal of Public*  
5 *Health* 2015;**27**:NP1827–36. doi:10.1177/1010539513506604
- 6 14 Holtom BC, O’Neill BS. Job Embeddedness: A Theoretical Foundation for Developing a  
7 Comprehensive Nurse Retention Plan. *Journal of Nursing Administration* 2004;**34**:216–27.  
8 doi:10.1097/00005110-200405000-00005
- 9 15 Yamaguchi Y, Inoue T, Harada H, *et al.* Job control, work-family balance and nurses’ intention  
10 to leave their profession and organization: A comparative cross-sectional survey. *International*  
11 *Journal of Nursing Studies* 2016;**64**:52–62. doi:10.1016/j.ijnurstu.2016.09.003
- 12 16 Battistelli A, Portoghese I, Galletta M, *et al.* Beyond the tradition: Test of an integrative  
13 conceptual model on nurse turnover. *International Nursing Review* 2013;**60**:103–11.  
14 doi:10.1111/j.1466-7657.2012.01024.x
- 15 17 Stewart NJ, D’Arcy C, Kosteniuk J, *et al.* Moving on? Predictors of intent to leave among rural  
16 and remote RNs in Canada. *Journal of Rural Health* 2011;**27**:103–13. doi:10.1111/j.1748-  
17 0361.2010.00308.x
- 18 18 Liu J, Zhu B, Wu J, *et al.* Job satisfaction, work stress, and turnover intentions among rural  
19 health workers: a cross-sectional study in 11 western provinces of China. *BMC Family Practice*  
20 2019;**20**:1–11. doi:10.1186/s12875-019-0904-0
- 21 19 Fang P, Liu X, Huang L, *et al.* Factors that influence the turnover intention of Chinese village  
22 doctors based on the investigation results of Xiangyang City in Hubei Province. *International*  
23 *Journal for Equity in Health* 2014;**13**:1–9. doi:10.1186/s12939-014-0084-4
- 24 20 Bonenberger M, Aikins M, Akweongo P, *et al.* The effects of health worker motivation and job  
25 satisfaction on turnover intention in Ghana: A cross-sectional study. *Human Resources for*  
26 *Health* 2014;**12**:1–12. doi:10.1186/1478-4491-12-43
- 27 21 Almalki MJ, FitzGerald G, Clark M. The relationship between quality of work life and  
28 turnover intention of primary health care nurses in Saudi Arabia. *BMC health services research*  
29 2012;**12**:314. doi:10.1186/1472-6963-12-314
- 30 22 Delobelle P, Rawlinson JL, Ntuli S, *et al.* Job satisfaction and turnover intent of primary  
31 healthcare nurses in rural South Africa: A questionnaire survey. *Journal of Advanced Nursing*  
32 2011;**67**:371–83. doi:10.1111/j.1365-2648.2010.05496.x
- 33 23 Roy A, Van Der Weijden T, De Vries N. Relationships of work characteristics to job  
34 satisfaction, turnover intention, and burnout among doctors in the district public-private mixed  
35 health system of Bangladesh. *BMC Health Services Research* 2017;**17**:1–11.  
36 doi:10.1186/s12913-017-2369-y
- 37 24 Zhang M, Yan F, Wang W, *et al.* Is the effect of person-organisation fit on turnover intention  
38 mediated by job satisfaction? A survey of community health workers in China. *BMJ Open*  
39 2017;**7**:1–8. doi:10.1136/bmjopen-2016-013872
- 40 25 Warmelink JC, Wieggers TA, de Cock TP, *et al.* Career plans of primary care midwives in the  
41 Netherlands and their intentions to leave the current job. *Human Resources for Health*  
42 2015;**13**:1–10. doi:10.1186/s12960-015-0025-3
- 43 26 Chen X, Ran L, Zhang Y, *et al.* Moderating role of job satisfaction on turnover intention and  
44 burnout among workers in primary care institutions : a cross-sectional study. 2019;:1–10.
- 45 27 Moreland JJ, Ewoldsen DR, Albert NM, *et al.* Predicting Nurses’ Turnover: The Aversive  
46 Effects of Decreased Identity, Poor Interpersonal Communication, and Learned Helplessness.  
47 *Journal of Health Communication* 2015;**20**:1155–65. doi:10.1080/10810730.2015.1018589
- 48 28 Eneroth M, Gustafsson Sendén M, Schenck Gustafsson K, *et al.* Threats or violence from  
49 patients was associated with turnover intention among foreign-born GPs—a comparison of four  
50 workplace factors associated with attitudes of wanting to quit one’s job as a GP. *Scandinavian*  
51 *Journal of Primary Health Care* 2017;**35**:208–13. doi:10.1080/02813432.2017.1333319
- 52 29 Han GS, Humphreys JS. Overseas-trained doctors in Australia: Community integration and  
53 their intention to stay in a rural community. *Australian Journal of Rural Health* 2005;**13**:236–  
54 41. doi:10.1111/j.1440-1584.2005.00708.x
- 55 30 Liberati A, Altman DG, Tetzlaff J, *et al.* The PRISMA statement for reporting systematic  
56 reviews and meta-analyses of studies that evaluate health care interventions: Explanation and  
57 elaboration. *PLoS Medicine* 2009;**6**. doi:10.1371/journal.pmed.1000100
- 58 31 Moher D, Liberati A, Tetzlaff J, *et al.* Preferred reporting items for systematic reviews and  
59 meta-analyses: The PRISMA statement. *PLoS Medicine* 2009;**6**.  
60 doi:10.1371/journal.pmed.1000097

- 1  
2  
3 32 EPOC. Cochrane Effective Practice and Organisation of Care Review Group (EPOC) - Data  
4 Collection Checklist. *EPOC* 2008.
- 5 33 Modesti PA. Cross Sectional Study Newcastle - Ottawa Quality Assessment Scale. *PLoS ONE*  
6 2016;**11**:1–2.
- 7 34 Higgins J, Green S. Chapter 22: Overview of reviews. Cochrane handbook for systematic  
8 reviews of interventions. *Cochrane Database of Systematic Reviews* 2008;:187–235.  
9 doi:10.1002/9780470712184.fmatter
- 10 35 Allen L, Williams J, Townsend N, *et al.* Socioeconomic status and non-communicable disease  
11 behavioural risk factors in low-income and lower-middle-income countries: a systematic  
12 review. *The Lancet Global Health* 2017;**5**:e277–89. doi:10.1016/S2214-109X(17)30058-X
- 13 36 Higgins JPT, Thompson SG, Deeks JJ, *et al.* Measuring inconsistency in meta-analyses. *BMJ*:  
14 *British Medical Journal* 2003;**327**:557–60. doi:10.1136/bmj.327.7414.557
- 15 37 Nikolakopoulou A, Mavridis D, Salanti G. How to interpret meta-analysis models: Fixed effect  
16 and random effects meta-analyses. *Evidence-Based Mental Health* 2014;**17**:64. doi:10.1136/eb-  
17 2014-101794
- 18 38 Greenwood DC. Meta-analysis of observational studies. *Modern Methods for Epidemiology*  
19 2012;:173–89. doi:10.1007/978-94-007-3024-3\_10
- 20 39 Gu Wen-juan, Jiang Qin-kang, Chen Min-hong LF. Empirical Study on Job Mobility and Job  
21 Satisfaction of Community Health Service Center Staff. *CHINESE PRIMARY HEALTH CARE*  
22 2012;**26**:23–6. doi:10.3969/j.issn.1001-568X.2012.07.010
- 23 40 Yao Wei-guang, Wei Guo-wen, Xu Ai-guang, Qiu Li-yan, Chen Zhuo YH. Sample Survey of  
24 Human Resources and Work Situation of Community Health Services in Guangdong Province.  
25 *Chinese General Practice* 2011;**14**:1779–81. doi:10.3969/j.issn.1007-9572.2011.14.009
- 26 41 Liu Kun, Jing Li-mei, Zhou Xu-hong, Sun Xiao-ming, Wang Li, Lou Ji-quan, Chen Ceng-ceng  
27 WJ. Rural healthcare workers' turnover intention during the reform incentive policies for rural  
28 healthcare professionals implemented. *Chinese General Practice* 2017;**20**:2338–41.  
29 doi:10.3969/j.issn.1007-9572.2017.19.009
- 30 42 Lu Yue, Ju Lei, Li Jiang-fei, Bi Lei, Zhu Zhi-Qiang, Li Hai-yan ZW. Analyzing the Stability of  
31 Rural Doctor Team in Shandong Province in Different Dimensions. *The Chinese Health*  
32 *Service Management* 2018;:517–20. doi:CNKI:SUN:ZWSG.0.2018-07-016
- 33 43 OU Wei—lin LKML. Study on fatigue status and turnover intention of primary health care  
34 workers in Guangdong. *Guangdong Medical Journal* 2018;**39**:3081–5.  
35 doi:10.13820/j.cnki.gdyx.20181107.007
- 36 44 Xu Yin, Ding Hong HZ. Study on the relationship between the subjective turnover intention of  
37 community health service personnel and demographic characteristics. *Anhui Medical Journal*  
38 2012;**33**:481–4. doi:10.3969/j.issn.1000-0399.2012.04.038
- 39 45 Zhou Qiong, Guan Wen-bo XJ. Correlation analysis of turnover tendency and working factors  
40 of primary nursing staff in a district of wuhan city. *Journal of mathematical medicine*  
41 2016;**29**:703–5. doi:10.3969/j.issn.1004-4337.2016.05.037
- 42 46 Shen Bing-jie, Hu Lin-lin, You Li-li LY. Turnover intention and its influencing factors among  
43 village doctors in central China. *Chinese General Practice* 2018;**21**:4183–7.  
44 doi:10.12114/j.issn.1007-9572.2018.34.005
- 45 47 Zhenzhen R. *Turnover intention and correlates of health personnel at county and township*  
46 *levels in Yunnan*. Kunming medical university. 2013.
- 47 48 Xu Li, Wang Jun-hua, Huang Wen-yong, Yang Jing-yuan JZ. Study of the turnover intention  
48 among rural health workers in Guizhou. *Chinese Primary Health Care* 2015;**29**:27–30.  
49 doi:10.3969/j.issn.1001-568X.2015.01.0010
- 50 49 Zhang Su-mei LX. Investigation and analysis on the turnover intention of nurses in primary  
51 and secondary hospitals in shaanxi province. *Journal of Qilu Nursing* 2013;**19**:55–7.  
52 doi:10.3969/j.issn.1006-7256.2013.08.027
- 53 50 Sun Y, Luo Z, Fang P. Factors influencing the turnover intention of chinese community health  
54 service workers based on the investigation results of five provinces. *Journal of Community*  
55 *Health* 2013;**38**:1058–66. doi:10.1007/s10900-013-9714-9
- 56 51 Zhang Huan, Pan Wen, Yan Di, Zhao Yang, Zhang Min-min LX. The current situation of  
57 nursing staff and their turnover in township health centers. *Chinese Journal of Health Policy*  
58 2015;**8**:23–8. doi:10.3969/j.issn.1674-2982.2015.08.005
- 59 52 Guan-yu L. *Analysis on human resource situation and influencing factors of community-level*  
60 *healthcare institutions*. 2019.

- 1  
2  
3 53 Hann M, Reeves D, Sibbald B. Relationships between job satisfaction, intentions to leave  
4 family practice and actually leaving among family physicians in England. *European Journal of*  
5 *Public Health* 2011;**21**:499–503. doi:10.1093/eurpub/ckq005
- 6 54 Heinen MM, van Achterberg T, Schwendimann R, *et al.* Nurses' intention to leave their  
7 profession: A cross sectional observational study in 10 European countries. *International*  
8 *Journal of Nursing Studies* 2013;**50**:174–84. doi:10.1016/j.ijnurstu.2012.09.019
- 9 55 Kao AC, Jager AJ, Koenig BA, *et al.* Physician Perception of Pay Fairness and its Association  
10 with Work Satisfaction, Intent to Leave Practice, and Personal Health. *Journal of General*  
11 *Internal Medicine* 2018;:1–6. doi:10.1007/s11606-017-4303-8
- 12 56 Wang H, Abajobir AA, Abate KH, *et al.* Global, regional, and national under-5 mortality, adult  
13 mortality, age-specific mortality, and life expectancy, 1970-2016: A systematic analysis for the  
14 Global Burden of Disease Study 2016. *The Lancet* 2017;**390**:1084–150. doi:10.1016/S0140-  
15 6736(17)31833-0
- 16 57 Labrague LJ, McEnroe – Petite DM, Tsaras K, *et al.* Organizational commitment and turnover  
17 intention among rural nurses in the Philippines: Implications for nursing management.  
18 *International Journal of Nursing Sciences* 2018;**5**:403–8. doi:10.1016/j.ijnss.2018.09.001
- 19 58 Wen T, Zhang Y, Wang X, *et al.* Factors influencing turnover intention among primary care  
20 doctors: A cross-sectional study in Chongqing, China. *Human Resources for Health*  
21 2018;**16**:1–11. doi:10.1186/s12960-018-0274-z
- 22 59 Yang SZ, Wu D, Wang N, *et al.* Workplace violence and its aftermath in China's health sector:  
23 Implications from a cross-sectional survey across three tiers of the health system. *BMJ Open*  
24 2019;**9**:1–10. doi:10.1136/bmjopen-2019-031513
- 25 60 Lu Y, Hu XM, Huang XL, *et al.* Job satisfaction and associated factors among healthcare staff:  
26 A cross-sectional study in Guangdong Province, China. *BMJ Open* 2016;**6**:1–9.  
27 doi:10.1136/bmjopen-2016-011388
- 28 61 Lo D, Wu F, Chan M, *et al.* A systematic review of burnout among doctors in China: A cultural  
29 perspective. *Asia Pacific Family Medicine* 2018;**17**:1–14. doi:10.1186/s12930-018-0040-3
- 30 62 Gold JA. Covid-19: Adverse mental health outcomes for healthcare workers. *The BMJ*  
31 2020;**369**:1–2. doi:10.1136/bmj.m1815
- 32 63 Lai J, Ma S, Wang Y, *et al.* Factors Associated With Mental Health Outcomes Among Health  
33 Care Workers Exposed to Coronavirus Disease 2019. *JAMA network open* 2020;**3**:e203976.  
34 doi:10.1001/jamanetworkopen.2020.3976
- 35 64 Organization WH. Global strategy on human resources for health: Workforce 2030. *Who*  
36 2016;:64. doi:10.1017/CBO9781107415324.004
- 37  
38  
39  
40  
41  
42  
43  
44  
45  
46  
47  
48  
49  
50  
51  
52  
53  
54  
55  
56  
57  
58  
59  
60

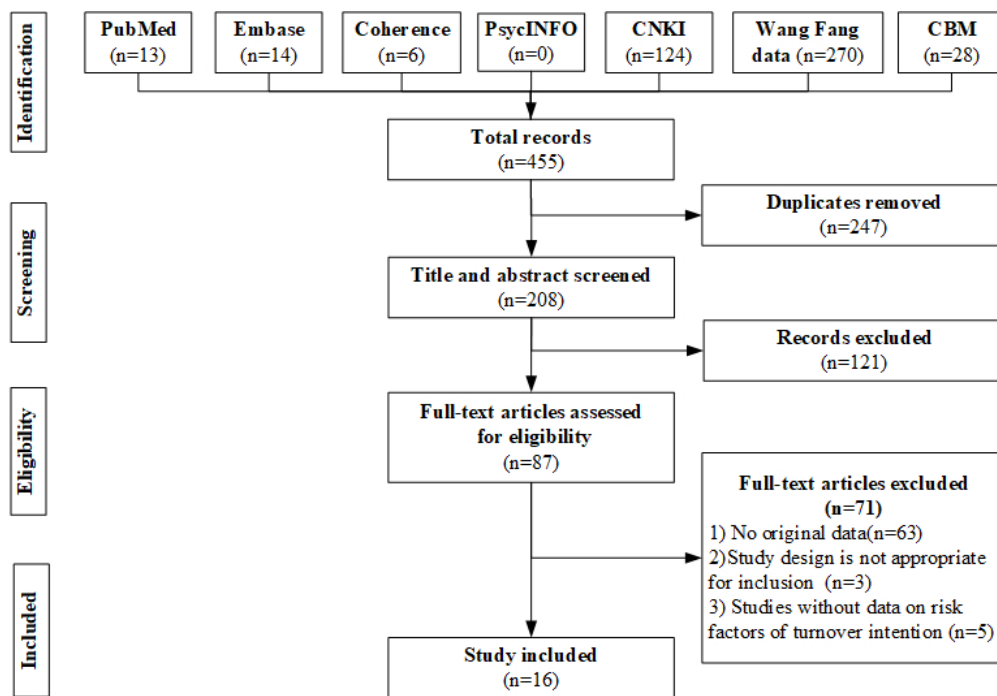

Figure 1 Flow diagram of the study selection

203x140mm (96 x 96 DPI)

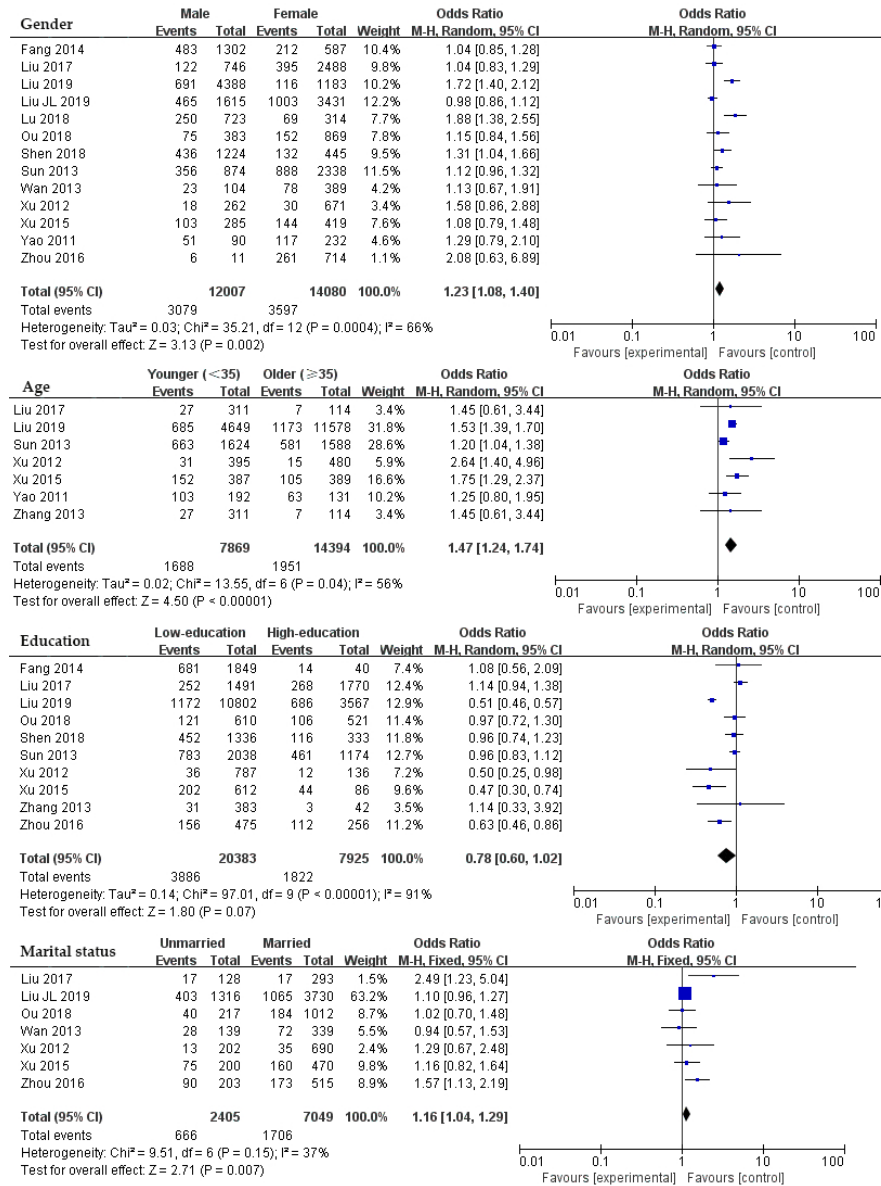

Figure 2 Forest plots of demographic factors

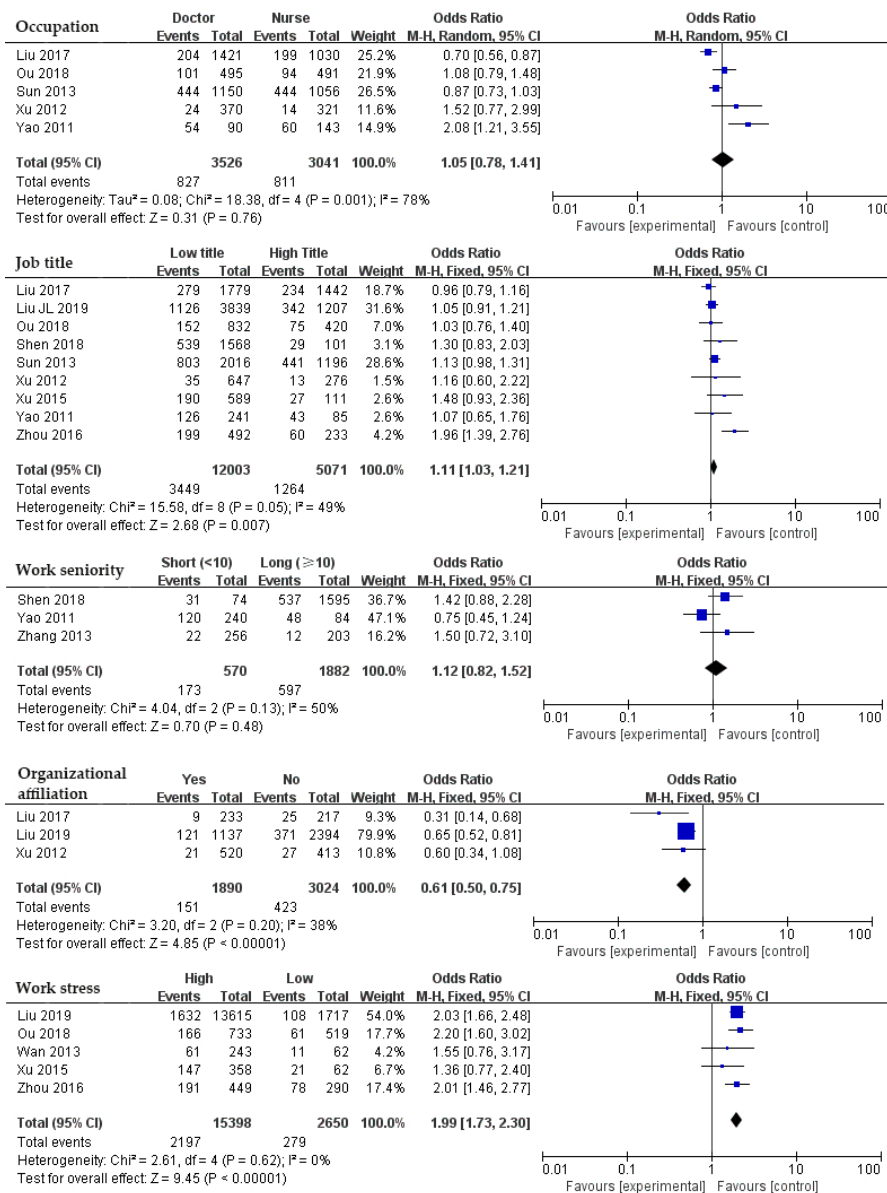

Figure 3 Forest plots of job characteristic factors

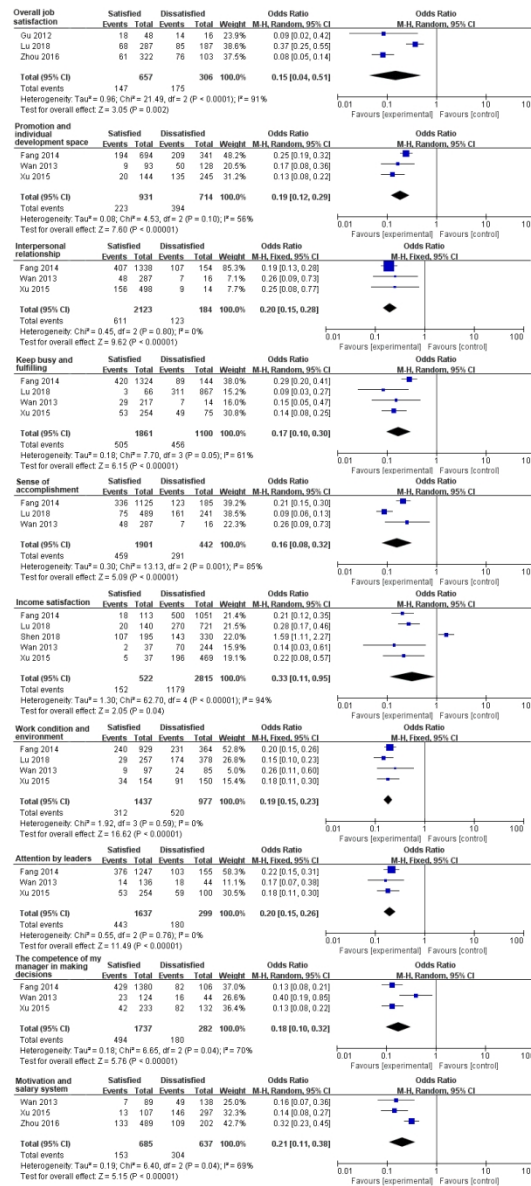

Figure 4 Forest plots of job satisfaction factors

**Table S1 Search strategy****Database 1: PubMed**

| Sequence | Query                                                                                                                                                                                                                                                                                                                                                                                                                                                                                                                                                                                                                                                                                                                                                      |
|----------|------------------------------------------------------------------------------------------------------------------------------------------------------------------------------------------------------------------------------------------------------------------------------------------------------------------------------------------------------------------------------------------------------------------------------------------------------------------------------------------------------------------------------------------------------------------------------------------------------------------------------------------------------------------------------------------------------------------------------------------------------------|
| #1       | Search (Chinese[MeSH Terms]) OR Chinese[Title/Abstract]                                                                                                                                                                                                                                                                                                                                                                                                                                                                                                                                                                                                                                                                                                    |
| #2       | Search (China[MeSH Terms]) OR China[Title/Abstract]                                                                                                                                                                                                                                                                                                                                                                                                                                                                                                                                                                                                                                                                                                        |
| #3       | <b>#1 OR #2</b><br>Search (((Chinese[MeSH Terms]) OR Chinese[Title/Abstract]))OR ((China[MeSH Terms]) OR China[Title/Abstract]))                                                                                                                                                                                                                                                                                                                                                                                                                                                                                                                                                                                                                           |
| #4       | Search (Health worker[MeSH Terms]) OR Health worker[Title/Abstract]                                                                                                                                                                                                                                                                                                                                                                                                                                                                                                                                                                                                                                                                                        |
| #5       | Search (Health officer[MeSH Terms]) OR Health officer[Title/Abstract]                                                                                                                                                                                                                                                                                                                                                                                                                                                                                                                                                                                                                                                                                      |
| #6       | Search (Health Manpower[MeSH Terms]) OR Health Manpower[Title/Abstract]                                                                                                                                                                                                                                                                                                                                                                                                                                                                                                                                                                                                                                                                                    |
| #7       | Search (Health Personnel[MeSH Terms]) OR Health Personnel[Title/Abstract]                                                                                                                                                                                                                                                                                                                                                                                                                                                                                                                                                                                                                                                                                  |
| #8       | Search (Medical Personnel[MeSH Terms]) OR Medical Personnel[Title/Abstract]                                                                                                                                                                                                                                                                                                                                                                                                                                                                                                                                                                                                                                                                                |
| #9       | Search (Medical worker[MeSH Terms]) OR Medical worker[Title/Abstract]                                                                                                                                                                                                                                                                                                                                                                                                                                                                                                                                                                                                                                                                                      |
| #10      | Search (Medical staff[MeSH Terms]) OR Medical staff[Title/Abstract]                                                                                                                                                                                                                                                                                                                                                                                                                                                                                                                                                                                                                                                                                        |
| #11      | Search (Doctor[MeSH Terms]) OR Doctor[Title/Abstract]                                                                                                                                                                                                                                                                                                                                                                                                                                                                                                                                                                                                                                                                                                      |
| #12      | Search (Physician[MeSH Terms]) OR Physician[Title/Abstract]                                                                                                                                                                                                                                                                                                                                                                                                                                                                                                                                                                                                                                                                                                |
| #13      | Search (Nurse[MeSH Terms]) OR Nurse [Title/Abstract]                                                                                                                                                                                                                                                                                                                                                                                                                                                                                                                                                                                                                                                                                                       |
| #14      | <b>#4 OR #5 OR #6 OR #7 OR #8 OR #9 OR #11 OR #12 OR #13</b><br>Search ((((((((((Health worker[MeSH Terms]) OR Health worker[Title/Abstract])) OR ((Health officer[MeSH Terms]) OR Health officer[Title/Abstract])) OR ((Health Manpower[MeSH Terms]) OR Health Manpower[Title/Abstract])) OR ((Health Personnel[MeSH Terms]) OR Health Personnel[Title/Abstract])) OR ((Medical Personnel[MeSH Terms]) OR Medical Personnel[Title/Abstract])) OR ((Medical worker[MeSH Terms]) OR Medical worker[Title/Abstract])) OR ((Medical staff[MeSH Terms]) OR Medical staff[Title/Abstract])) OR ((Doctor[MeSH Terms]) OR Doctor[Title/Abstract])) OR ((Physician[MeSH Terms]) OR Physician[Title/Abstract])) OR ((Nurse[MeSH Terms]) OR Nurse [Title/Abstract])) |
| #15      | Search (Rural[MeSH Terms]) OR Rural[Title/Abstract]                                                                                                                                                                                                                                                                                                                                                                                                                                                                                                                                                                                                                                                                                                        |
| #16      | Search (Countryside[MeSH Terms]) OR Countryside[Title/Abstract]                                                                                                                                                                                                                                                                                                                                                                                                                                                                                                                                                                                                                                                                                            |
| #17      | Search (Community[MeSH Terms]) OR Community[Title/Abstract]                                                                                                                                                                                                                                                                                                                                                                                                                                                                                                                                                                                                                                                                                                |
| #18      | Search (District[MeSH Terms]) OR District[Title/Abstract]                                                                                                                                                                                                                                                                                                                                                                                                                                                                                                                                                                                                                                                                                                  |
| #19      | Search (Basic[MeSH Terms]) OR Basic[Title/Abstract]                                                                                                                                                                                                                                                                                                                                                                                                                                                                                                                                                                                                                                                                                                        |
| #20      | Search (Fundamental[MeSH Terms]) OR Fundamental[Title/Abstract]                                                                                                                                                                                                                                                                                                                                                                                                                                                                                                                                                                                                                                                                                            |
| #21      | Search (Primary[MeSH Terms]) OR Primary[Title/Abstract]                                                                                                                                                                                                                                                                                                                                                                                                                                                                                                                                                                                                                                                                                                    |
| #22      | Search (Grass roots[MeSH Terms]) OR Grass roots[Title/Abstract]                                                                                                                                                                                                                                                                                                                                                                                                                                                                                                                                                                                                                                                                                            |
| #23      | <b>#7 OR #8 OR #9 OR #11 OR #12 OR #13 OR #14</b><br>Search (((Primary[MeSH Terms]) OR Primary[Title/Abstract]) OR Grass roots[MeSH Terms]) OR Grass roots[Title/Abstract]) OR (((Community[MeSH Terms]) OR Community[Title/Abstract]) OR ((((((((((Rural[MeSH Terms]) OR Rural[Title/Abstract]) OR Countryside[MeSH Terms]) OR Countryside[Title/Abstract]) OR District[MeSH Terms]) OR District[Title/Abstract]) OR Basic[MeSH Terms]) OR Basic[Title/Abstract]) OR Fundamental[MeSH Terms]) OR Fundamental[Title/Abstract]))                                                                                                                                                                                                                            |



|     |                                                                                                                                                                                                                                                                                                                                                                                                                                                                                                                                                                                                                                                                                                                                                                                                                                                                                                                                                                                                                                                                                                                                                                                                                                                                                                                                                                                                                                                                                                                                                                                                                                                                                            |
|-----|--------------------------------------------------------------------------------------------------------------------------------------------------------------------------------------------------------------------------------------------------------------------------------------------------------------------------------------------------------------------------------------------------------------------------------------------------------------------------------------------------------------------------------------------------------------------------------------------------------------------------------------------------------------------------------------------------------------------------------------------------------------------------------------------------------------------------------------------------------------------------------------------------------------------------------------------------------------------------------------------------------------------------------------------------------------------------------------------------------------------------------------------------------------------------------------------------------------------------------------------------------------------------------------------------------------------------------------------------------------------------------------------------------------------------------------------------------------------------------------------------------------------------------------------------------------------------------------------------------------------------------------------------------------------------------------------|
| #24 | Search(Turnover Intention[MeSH Terms]) OR Turnover Intention[Title/Abstract]                                                                                                                                                                                                                                                                                                                                                                                                                                                                                                                                                                                                                                                                                                                                                                                                                                                                                                                                                                                                                                                                                                                                                                                                                                                                                                                                                                                                                                                                                                                                                                                                               |
| #25 | Search (Departure Intention[MeSH Terms]) OR Departure Intention[Title/Abstract]                                                                                                                                                                                                                                                                                                                                                                                                                                                                                                                                                                                                                                                                                                                                                                                                                                                                                                                                                                                                                                                                                                                                                                                                                                                                                                                                                                                                                                                                                                                                                                                                            |
| #26 | Search (Demission Intention[MeSH Terms]) OR Demission Intention[Title/Abstract]                                                                                                                                                                                                                                                                                                                                                                                                                                                                                                                                                                                                                                                                                                                                                                                                                                                                                                                                                                                                                                                                                                                                                                                                                                                                                                                                                                                                                                                                                                                                                                                                            |
| #27 | Search(Leave Intention[MeSH Terms]) OR Leave Intention[Title/Abstract]                                                                                                                                                                                                                                                                                                                                                                                                                                                                                                                                                                                                                                                                                                                                                                                                                                                                                                                                                                                                                                                                                                                                                                                                                                                                                                                                                                                                                                                                                                                                                                                                                     |
| #28 | Search intent to leave[Title/Abstract]                                                                                                                                                                                                                                                                                                                                                                                                                                                                                                                                                                                                                                                                                                                                                                                                                                                                                                                                                                                                                                                                                                                                                                                                                                                                                                                                                                                                                                                                                                                                                                                                                                                     |
| #29 | <b>#18 OR #19 OR #20</b><br>Search ((((((Turnover Intention[MeSH Terms]) OR Turnover Intention[Title/Abstract])) OR ((Departure Intention[MeSH Terms]) OR Departure Intention[Title/Abstract])) OR ((Demission Intention[MeSH Terms]) OR Demission Intention[Title/Abstract])) OR ((Leave Intention[MeSH Terms]) OR Leave Intention[Title/Abstract])) OR intent to leave[Title/Abstract]                                                                                                                                                                                                                                                                                                                                                                                                                                                                                                                                                                                                                                                                                                                                                                                                                                                                                                                                                                                                                                                                                                                                                                                                                                                                                                   |
| #30 | <b>#3 AND #10AND #17AND #21</b><br>Search ((((((((((Turnover Intention[MeSH Terms]) OR Turnover Intention[Title/Abstract])) OR ((Departure Intention[MeSH Terms]) OR Departure Intention[Title/Abstract])) OR ((Demission Intention[MeSH Terms]) OR Demission Intention[Title/Abstract])) OR ((Leave Intention[MeSH Terms]) OR Leave Intention[Title/Abstract])) OR intent to leave[Title/Abstract])) AND (((((((Primary[MeSH Terms]) OR Primary[Title/Abstract]) OR Grass roots[MeSH Terms]) OR Grass roots[Title/Abstract]) OR (((Community[MeSH Terms]) OR Community[Title/Abstract]) OR (((((((Rural[MeSH Terms]) OR Rural[Title/Abstract]) OR Countryside[MeSH Terms]) OR Countryside[Title/Abstract]) OR District[MeSH Terms]) OR District[Title/Abstract]) OR Basic[MeSH Terms]) OR Basic[Title/Abstract]) OR fundamental[MeSH Terms]) OR fundamental[Title/Abstract]))) AND (((((((((((Health worker[MeSH Terms]) OR Health worker[Title/Abstract])) OR ((Health officer[MeSH Terms]) OR Health worker[Title/Abstract])) OR ((Health Manpower[MeSH Terms]) OR Health Manpower[Title/Abstract])) OR ((Health Personnel[MeSH Terms]) OR Health Personnel[Title/Abstract])) OR ((Medical Personnel[MeSH Terms]) OR Medical Personnel[Title/Abstract])) OR ((Medical worker[MeSH Terms]) OR Medical worker[Title/Abstract])) OR ((Medical staff[MeSH Terms]) OR Medical staff[Title/Abstract])) OR ((Doctor[MeSH Terms]) OR Doctor[Title/Abstract])) OR ((Physician[MeSH Terms]) OR Physician[Title/Abstract])) OR ((Nurse[MeSH Terms]) OR Nurse [Title/Abstract])) AND (((((Chinese[MeSH Terms]) OR Chinese[Title/Abstract]))OR ((China[MeSH Terms]) OR China[Title/Abstract])))))))) |

**Database 2: EMBASE**

| Sequence | Query                                                                                                                                                                                     |
|----------|-------------------------------------------------------------------------------------------------------------------------------------------------------------------------------------------|
| #1       | 'China'/exp                                                                                                                                                                               |
| #2       | 'China':ti,ab                                                                                                                                                                             |
| #3       | #1 OR #2                                                                                                                                                                                  |
| #4       | 'Turnover Intention' OR 'Departure Intention' OR 'Demission Intention' OR 'Leave Intention'/exp                                                                                           |
| #5       | 'Turnover Intention' OR 'Departure Intention' OR 'Demission Intention' OR 'Leave Intention' OR 'intent to leave':ti,ab                                                                    |
| #6       | #4 OR #5                                                                                                                                                                                  |
| #7       | 'Primary' OR 'Grass roots' OR 'Community' OR 'Countryside' OR 'District' OR 'Basic' OR 'Rural' OR 'Fundamental':ti,ab                                                                     |
| #8       | 'Health worker' OR 'Health officer' OR 'Health Manpower' OR 'Health Personnel' OR 'Medical Personnel' OR 'Medical worker' OR 'Medical staff ' OR 'Doctor' OR 'Physician' OR 'Nurse':ti,ab |

|    |                         |
|----|-------------------------|
| #9 | #3 AND #6 AND #7 AND #8 |
|----|-------------------------|

### Database 3: Cochrane Library

| Sequence | Query                                                                                                                                                                                             |
|----------|---------------------------------------------------------------------------------------------------------------------------------------------------------------------------------------------------|
| #1       | china:ti,ab,kw (Word variations have been searched)                                                                                                                                               |
| #2       | chinese:ti,ab,kw(Word variations have been searched)                                                                                                                                              |
| #3       | #1 or #2                                                                                                                                                                                          |
| #4       | (turnover intention):ti,ab,kw OR (departure Intention):ti,ab,kw OR (demission Intention):ti,ab,kw OR (leave Intention):ti,ab,kw OR (intent to leave):ti,ab,kw(Word variations have been searched) |
| #5       | (primary):ti,ab,kw OR (community):ti,ab,kw OR (rural):ti,ab,kw OR (basic):ti,ab,kw OR (countryside):ti,ab,kw(Word variations have been searched)                                                  |
| #6       | (health worker):ti,ab,kw OR (health manpower):ti,ab,kw OR (health personnel):ti,ab,kw OR (health officer):ti,ab,kw(Word variations have been searched)                                            |
| #7       | (medical worker):ti,ab,kw OR (medical staff):ti,ab,kw OR (doctor):ti,ab,kw OR (physician):ti,ab,kw OR (nurse):ti,ab,kw(Word variations have been searched)                                        |
| #8       | #5 or #6                                                                                                                                                                                          |
| #9       | #3 and #4 and #5 and #8                                                                                                                                                                           |

### Database 4: PsycINFO

| Sequence | Query                                                                                                                                                                                                                                                                                                                                                                                                                                                                                                      |
|----------|------------------------------------------------------------------------------------------------------------------------------------------------------------------------------------------------------------------------------------------------------------------------------------------------------------------------------------------------------------------------------------------------------------------------------------------------------------------------------------------------------------|
| #1       | Title: china OR Abstract: china OR Title: chinese OR Abstract: chinese                                                                                                                                                                                                                                                                                                                                                                                                                                     |
| #2       | Title: turnover intention OR Abstract: turnover intention OR Title: Departure Intention OR Abstract: Departure Intention OR Title: Demission Intention OR Abstract: Demission Intention OR Title: Leave Intention OR Abstract: Leave Intention OR Abstract: intent to leave                                                                                                                                                                                                                                |
| #3       | Title: Health worker OR Abstract: Health worker OR Title: Health officer OR Abstract: Health officer OR Title: Health Manpower OR Abstract: Health Manpower OR Title: Health Personnel OR Abstract: Health Personnel OR Title: Medical Personnel OR Abstract: Medical Personnel OR Title: Medical worker OR Abstract: Medical worker OR Title: Medical staff OR Abstract: Medical staff OR Title: Doctor OR Abstract: Doctor OR Title: Physician OR Abstract: Physician OR Title: Nurse OR Abstract: Nurse |
| #4       | Title: Rural OR Abstract: Rural OR Title: Countryside OR Abstract: Countryside OR Title: Community OR Abstract: Community OR Title: District OR Abstract: District OR Title: Basic OR Abstract: Basic OR Title: Fundamental OR Abstract: Fundamental OR Title: Primary OR Abstract: Primary OR Title: Grass roots OR Abstract: Grass roots                                                                                                                                                                 |
| #5       | #1 AND #2 AND #3 AND #4                                                                                                                                                                                                                                                                                                                                                                                                                                                                                    |

### Database 5: CAJD (CNKI)

SU=('医生'+ '医务人员'+ '护士'+ '卫生人员')AND SU=('离职意愿'+ '离职倾向'+ '离职意向'+ '留职意愿'+ '工作意愿'+ '留职意向')AND SU=('基层'+ '社区'+ '农村'+ '乡镇卫生院'+ '卫生服务中心')

### Database 6: CSPD (WANFANG Data)

(题名或关键词:(社区)+题名或关键词:(农村)+题名或关键词:(基层) +题名或关键词:(乡镇卫生院) +题名或关键词:(卫生服务中心))\* (题名或关键词:(离职意愿)+题名或关键词:(离职倾向)+题名或关键词:(离职意向)) +题名或关键词:(留职意愿)) +题名或关键词:(工作意愿)) +题名或关键词:(留职意向)) \*(题名或关键词:(医生)+题名或关键词:(护士)+题名或关键词:(医务人员) +题名或关键词:(卫生人员))

**Database 7: CBM**

((("社区"[标题:智能]) OR "基层"[标题:智能]) OR "农村"[标题:智能]) OR "乡镇卫生院"[标题:智能]) OR "卫生服务中心"  
"[标题:智能]) AND (((("离职意愿"[标题:智能]) OR "离职倾向"[标题:智能]) OR "离职意向"[标题:智能]) OR "留职意愿"  
"[标题:智能]) OR "工作意愿"[标题:智能]) OR "留职意向"[标题:智能]) AND (((("医生"[标题:智能]) OR "护士"[标题:智能])  
OR "卫生人员"[标题:智能]) OR "医务人员"[标题:智能])

For peer review only

**Table S2 The inter-rater reliability for the title abstract screening by the two authors**

|           | Title    |          | Abstract |          |
|-----------|----------|----------|----------|----------|
|           | Author 1 | Author 2 | Author 1 | Author 2 |
| Included  | 120      | 112      | 89       | 83       |
| Excluded  | 88       | 96       | 25       | 31       |
| Agreement | 200      |          | 108      |          |
| Sum       | 208      |          | 114      |          |
| Rate      | 96.15%   |          | 94.74%   |          |

1  
2  
3  
4  
5  
6  
7  
8  
9  
10  
11  
12  
13  
14  
15  
16  
17  
18  
19  
20  
21  
22  
23  
24  
25  
26  
27  
28  
29  
30  
31  
32  
33  
34  
35  
36  
37  
38  
39  
40  
41  
42  
43  
44  
45  
46

**Table S3 47 factors related to TI**

| Group | Category           | Exposure                                                                                                                                                                                                                                                                                                                                                                                                                                                                                                                                                                                                                                 |
|-------|--------------------|------------------------------------------------------------------------------------------------------------------------------------------------------------------------------------------------------------------------------------------------------------------------------------------------------------------------------------------------------------------------------------------------------------------------------------------------------------------------------------------------------------------------------------------------------------------------------------------------------------------------------------------|
| A     | Demographic        | A1-gender, A2-age, A3-education, A4-region, A5-marital status, A6-nation, A7-major,                                                                                                                                                                                                                                                                                                                                                                                                                                                                                                                                                      |
| B     | Job characteristic | B1-occupation, B2-job title, B3-work seniority, B4-qualified to practice, B5- remuneration, B6-medical institution, B7-organizational affiliation, B8- re-employ after retirement, B9-turnover experience, B10-individual income levels in the local, B11-work stress, B12-emotional exhaustion, B13-flattening of affect, B14-public health service, B15- working hours, B16-career planning, B17-career identity, B18-Social status B19-influence family life, B20-living condition, B21-lack of insurance, B22-patient trust.                                                                                                         |
| C     | Job satisfaction   | C1-learning and training opportunities, C2-promotion and individual development space, C3-interpersonal relationship, C4-work conditions and environment, C5- sense of accomplishment, C6-scientific research atmosphere, C7-level of attention by leaders, C8-income satisfaction, C9-keep busy and fulfilling, C10-the competence of my manager in making decisions, C11-work stability, C12-policies practice, C13-the chance to try my own methods of doing the job, C14-the chance to do something that makes use of my abilities, C15-job satisfaction. C16-work support, C17-income fairness, C18-motivation and salary system ., |

**Table S4 Quality scores assessing risk of bias using a modified Newcastle-Ottawa scale**

Study type: Cross-sectional; Score: 1=achieved, 0=not achieved

| Authors     | Representativeness of the sample | Sample size | Non-respondents | Ascertainment of the exposure | Comparability of subjects in different outcome groups (control for confounding) | Assessment of the outcome | Statistical test is appropriate | Total score |
|-------------|----------------------------------|-------------|-----------------|-------------------------------|---------------------------------------------------------------------------------|---------------------------|---------------------------------|-------------|
| Xu,2012     | 1                                | 1           | 0               | 1                             | 1                                                                               | 1                         | 1                               | 6           |
| Gu,2012     | 0                                | 1           | 0               | 1                             | 1                                                                               | 1                         | 1                               | 5           |
| Yao,2011    | 0                                | 1           | 0               | 1                             | 0                                                                               | 1                         | 1                               | 4           |
| Lu,2018     | 1                                | 1           | 0               | 1                             | 0                                                                               | 1                         | 1                               | 5           |
| Ou,2018     | 1                                | 1           | 0               | 1                             | 1                                                                               | 1                         | 1                               | 6           |
| Xu,2015     | 0                                | 1           | 0               | 1                             | 1                                                                               | 1                         | 1                               | 5           |
| Liu,2019    | 1                                | 1           | 0               | 1                             | 1                                                                               | 1                         | 1                               | 6           |
| Zhang,2013  | 0                                | 1           | 0               | 1                             | 1                                                                               | 1                         | 1                               | 5           |
| Liu,2017    | 1                                | 1           | 0               | 1                             | 0                                                                               | 1                         | 1                               | 5           |
| Shen,2018   | 1                                | 1           | 0               | 1                             | 1                                                                               | 1                         | 1                               | 6           |
| Zhou,2016   | 0                                | 1           | 0               | 1                             | 0                                                                               | 1                         | 1                               | 4           |
| Zhang,2015  | 0                                | 1           | 0               | 1                             | 1                                                                               | 1                         | 1                               | 5           |
| Wan,2013    | 0                                | 1           | 0               | 1                             | 0                                                                               | 1                         | 1                               | 4           |
| Fang,2014   | 1                                | 1           | 0               | 1                             | 1                                                                               | 1                         | 1                               | 6           |
| Sun,2013    | 1                                | 1           | 0               | 1                             | 1                                                                               | 1                         | 1                               | 6           |
| Liu JL,2019 | 1                                | 1           | 0               | 1                             | 1                                                                               | 1                         | 1                               | 6           |

Table S5 Meta-analyses on 19 factors

| Exposure                                      | No. of studies in<br>Meta-analyses | Comparison model                                                                           | Q test         |           | Statistical<br>model | Pooled OR<br>OR (95%CI) | Z test<br>P-value | Egger<br>P> t |
|-----------------------------------------------|------------------------------------|--------------------------------------------------------------------------------------------|----------------|-----------|----------------------|-------------------------|-------------------|---------------|
|                                               |                                    |                                                                                            | I <sup>2</sup> | P-value   |                      |                         |                   |               |
| <b>Demographic factors</b>                    |                                    |                                                                                            |                |           |                      |                         |                   |               |
| Gender                                        | 13                                 | Male vs. female                                                                            | 66%            | 0.0004    | Random-effect        | 1.23 [1.08, 1.40]       | 0.002             | 0.240         |
| Age                                           | 7                                  | Younger (<35) vs. older (≥35)                                                              | 56%            | 0.04      | Random-effect        | 1.47 [1.24, 1.74]       | < 0.00001         | 0.368         |
| Education                                     | 10                                 | Low-education (junior college or below)<br>vs. high-education(bachelor degree or<br>above) | 91%            | < 0.00001 | Random-effect        | 0.78 [0.60,1.02]        | 0.07              | 0.325         |
| Marital status                                | 7                                  | Unmarried vs. married                                                                      | 37%            | 0.15      | Fixed-effect         | 1.16 [1.04, 1.29]       | 0.007             | 0.095         |
| <b>Job characteristic factors</b>             |                                    |                                                                                            |                |           |                      |                         |                   |               |
| Occupation                                    | 5                                  | Doctor vs. nurse                                                                           | 78%            | 0.001     | Random-effect        | 1.05 [0.78, 1.41]       | 0.76              | 0.221         |
| Job title                                     | 9                                  | Low-title (no title or junior title) vs. high-<br>title (middle title or senior title)     | 49%            | 0.05      | Fixed-effect         | 1.11 [1.03, 1.21]       | 0.007             | 0.223         |
| Work seniority                                | 3                                  | Short (<10) vs. long (≥10)                                                                 | 50%            | 0.13      | Fixed-effect         | 1.12 [1.82, 1.52]       | 0.48              | 0.117         |
| Organizational affiliation                    | 4                                  | Authorized personnel vs. others                                                            | 38%            | 0.20      | Fixed-effect         | 0.85 [0.73, 1.00]       | < 0.00001         | 0.400         |
| Work stress                                   | 5                                  | High vs. low                                                                               | 0%             | 0.62      | Fixed-effect         | 3.14 [2.73, 3.61]       | < 0.00001         | 0.169         |
| <b>Job satisfaction factors</b>               |                                    |                                                                                            |                |           |                      |                         |                   |               |
| Overall job satisfaction                      | 3                                  | Satisfied vs. dissatisfied                                                                 | 91%            | < 0.0001  | Random-effect        | 0.15 [0.04, 0.51]       | 0.002             | 0.561         |
| Promotion and individual<br>development space | 3                                  | Satisfied vs. dissatisfied                                                                 | 56%            | 0.10      | Random-effect        | 0.19 [0.12, 0.29]       | < 0.00001         | 0.160         |
| Interpersonal relationship                    | 3                                  | Satisfied vs. dissatisfied                                                                 | 0%             | 0.80      | Fixed-effect         | 0.20 [0.15, 0.28]       | < 0.00001         | 0.522         |
| Keep busy and fulfilling                      | 4                                  | Satisfied vs. dissatisfied                                                                 | 61%            | 0.05      | Random-effect        | 0.39 [0.33, 0.47]       | < 0.00001         | 0.162         |
| Sense of accomplishment                       | 3                                  | Satisfied vs. dissatisfied                                                                 | 85%            | 0.001     | Random-effect        | 0.16 [0.08, 0.32]       | < 0.00001         | 0.291         |

|    |                                 |   |                            |     |           |               |                   |           |       |
|----|---------------------------------|---|----------------------------|-----|-----------|---------------|-------------------|-----------|-------|
| 1  |                                 |   |                            |     |           |               |                   |           |       |
| 2  |                                 |   |                            |     |           |               |                   |           |       |
| 3  |                                 |   |                            |     |           |               |                   |           |       |
| 4  |                                 |   |                            |     |           |               |                   |           |       |
| 5  | Income satisfaction             | 5 | Satisfied vs. dissatisfied | 94% | < 0.00001 | Random-effect | 0.33 [0.11, 0.95] | 0.04      | 0.216 |
| 6  | Work condition and environment  | 5 | Satisfied vs. dissatisfied | 0%  | 0.59      | Fixed-effect  | 0.19 [0.15, 0.23] | < 0.00001 | 0.153 |
| 7  | Attention by leaders            | 3 | Satisfied vs. dissatisfied | 0%  | 0.76      | Fixed-effect  | 0.20 [0.15, 0.26] | < 0.00001 | 0.120 |
| 8  |                                 |   |                            |     |           |               |                   |           |       |
| 9  | The competence of my manager in |   |                            |     |           |               |                   |           |       |
| 10 | making decisions                | 3 | Satisfied vs. dissatisfied | 70% | 0.04      | Random-effect | 0.18 [0.10, 0.32] | < 0.00001 | 0.210 |
| 11 |                                 |   |                            |     |           |               |                   |           |       |
| 12 | Motivation and salary system    | 3 | Satisfied vs. dissatisfied | 69% | 0.04      | Random-effect | 0.21 [0.11, 0.38] | < 0.00001 | 0.161 |
| 13 |                                 |   |                            |     |           |               |                   |           |       |
| 14 |                                 |   |                            |     |           |               |                   |           |       |
| 15 |                                 |   |                            |     |           |               |                   |           |       |
| 16 |                                 |   |                            |     |           |               |                   |           |       |
| 17 |                                 |   |                            |     |           |               |                   |           |       |
| 18 |                                 |   |                            |     |           |               |                   |           |       |
| 19 |                                 |   |                            |     |           |               |                   |           |       |
| 20 |                                 |   |                            |     |           |               |                   |           |       |
| 21 |                                 |   |                            |     |           |               |                   |           |       |
| 22 |                                 |   |                            |     |           |               |                   |           |       |
| 23 |                                 |   |                            |     |           |               |                   |           |       |
| 24 |                                 |   |                            |     |           |               |                   |           |       |
| 25 |                                 |   |                            |     |           |               |                   |           |       |
| 26 |                                 |   |                            |     |           |               |                   |           |       |
| 27 |                                 |   |                            |     |           |               |                   |           |       |
| 28 |                                 |   |                            |     |           |               |                   |           |       |
| 29 |                                 |   |                            |     |           |               |                   |           |       |
| 30 |                                 |   |                            |     |           |               |                   |           |       |
| 31 |                                 |   |                            |     |           |               |                   |           |       |
| 32 |                                 |   |                            |     |           |               |                   |           |       |
| 33 |                                 |   |                            |     |           |               |                   |           |       |
| 34 |                                 |   |                            |     |           |               |                   |           |       |
| 35 |                                 |   |                            |     |           |               |                   |           |       |
| 36 |                                 |   |                            |     |           |               |                   |           |       |
| 37 |                                 |   |                            |     |           |               |                   |           |       |
| 38 |                                 |   |                            |     |           |               |                   |           |       |
| 39 |                                 |   |                            |     |           |               |                   |           |       |
| 40 |                                 |   |                            |     |           |               |                   |           |       |
| 41 |                                 |   |                            |     |           |               |                   |           |       |
| 42 |                                 |   |                            |     |           |               |                   |           |       |
| 43 |                                 |   |                            |     |           |               |                   |           |       |
| 44 |                                 |   |                            |     |           |               |                   |           |       |
| 45 |                                 |   |                            |     |           |               |                   |           |       |
| 46 |                                 |   |                            |     |           |               |                   |           |       |



1  
2  
3  
4  
5  
6  
7  
8  
9  
10  
11  
12  
13  
14  
15  
16  
17  
18  
19  
20  
21  
22  
23  
24  
25  
26  
27  
28  
29  
30  
31  
32  
33  
34  
35  
36  
37  
38  
39  
40  
41  
42  
43  
44  
45  
46  
47  
48  
49  
50  
51  
52  
53  
54  
55  
56  
57  
58  
59  
60

For peer review only

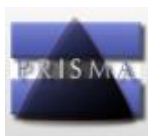

# PRISMA 2009 Flow Diagram

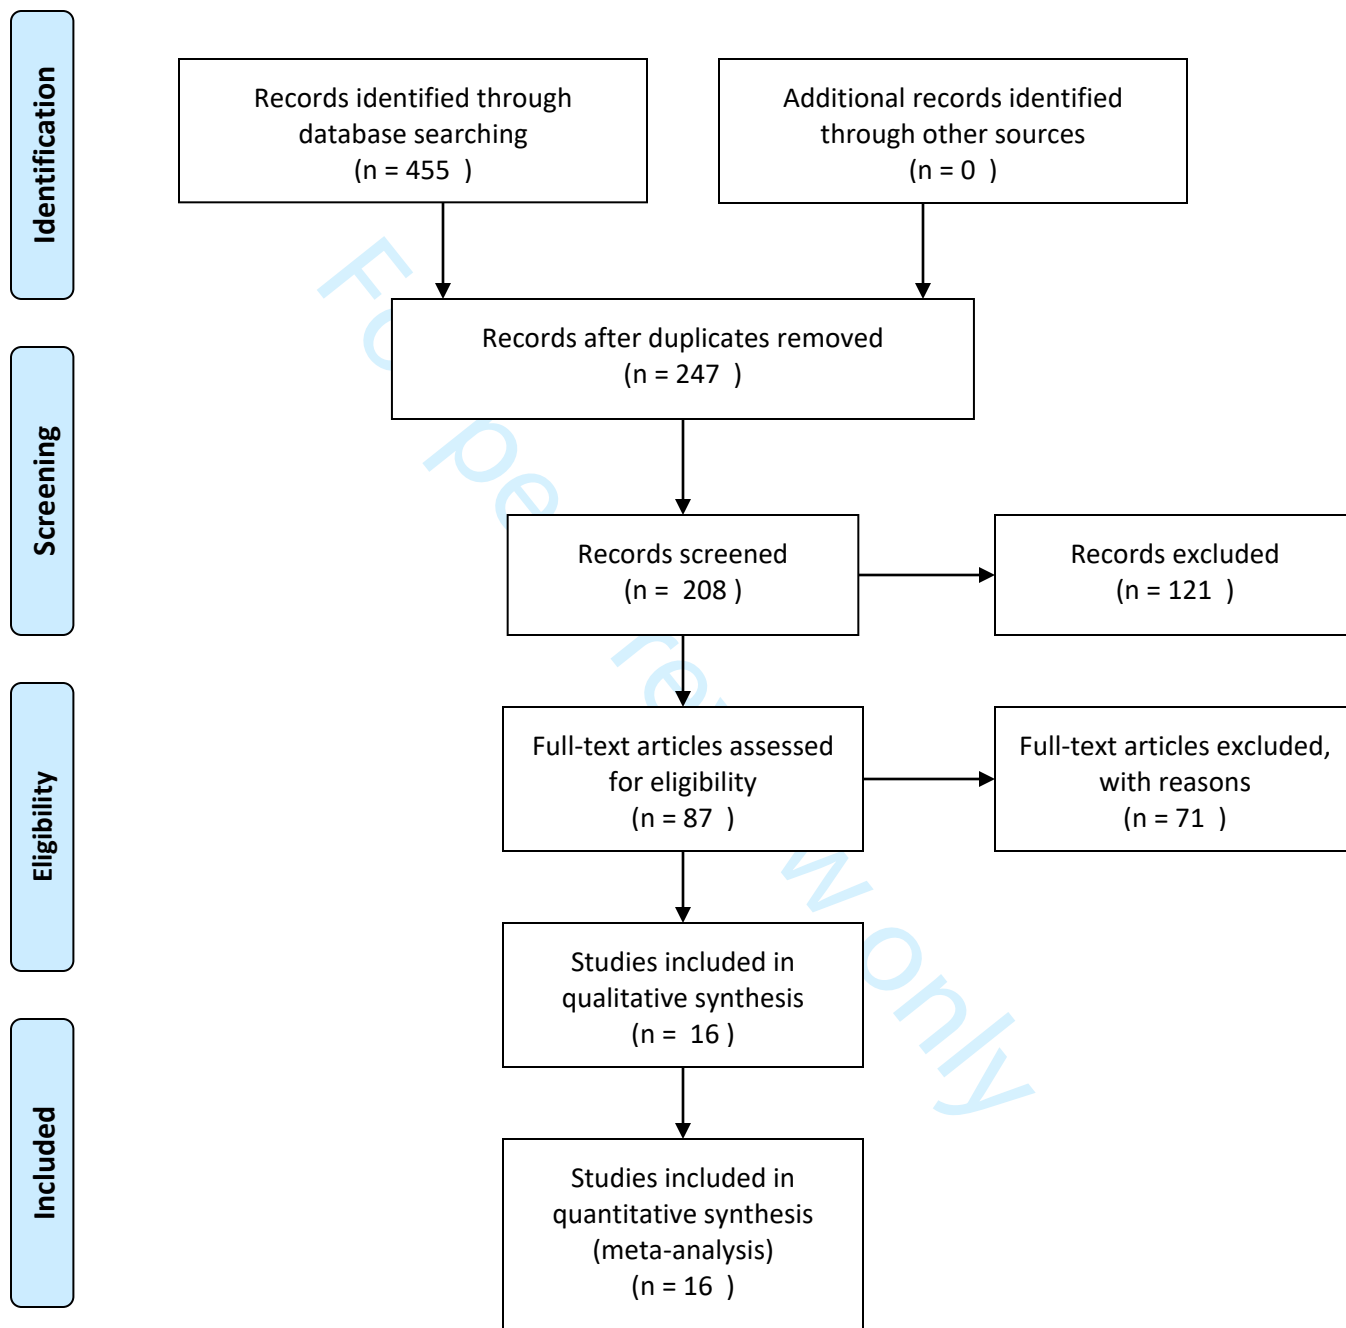

From: Moher D, Liberati A, Tetzlaff J, Altman DG, The PRISMA Group (2009). Preferred Reporting Items for Systematic Reviews and Meta-Analyses: The PRISMA Statement. PLoS Med 6(7): e1000097. doi:10.1371/journal.pmed1000097

For more information, visit [www.prisma-statement.org](http://www.prisma-statement.org).

For peer review only - <http://bmjopen.bmj.com/site/about/guidelines.xhtml>

## MOOSE Checklist for Meta-analyses of Observational Studies

| Item No                                     | Recommendation                                                                                                                                                                                                                                                               | Reported on Page No     |
|---------------------------------------------|------------------------------------------------------------------------------------------------------------------------------------------------------------------------------------------------------------------------------------------------------------------------------|-------------------------|
| Reporting of background should include      |                                                                                                                                                                                                                                                                              |                         |
| 1                                           | Problem definition                                                                                                                                                                                                                                                           | 3                       |
| 2                                           | Hypothesis statement                                                                                                                                                                                                                                                         | -                       |
| 3                                           | Description of study outcome(s)                                                                                                                                                                                                                                              | 5                       |
| 4                                           | Type of exposure or intervention used                                                                                                                                                                                                                                        | 4                       |
| 5                                           | Type of study designs used                                                                                                                                                                                                                                                   | 4-5                     |
| 6                                           | Study population                                                                                                                                                                                                                                                             | 6                       |
| Reporting of search strategy should include |                                                                                                                                                                                                                                                                              |                         |
| 7                                           | Qualifications of searchers (eg, librarians and investigators)                                                                                                                                                                                                               | 4                       |
| 8                                           | Search strategy, including time period included in the synthesis and key words                                                                                                                                                                                               | 4, Table S1             |
| 9                                           | Effort to include all available studies, including contact with authors                                                                                                                                                                                                      | 6                       |
| 10                                          | Databases and registries searched                                                                                                                                                                                                                                            | 4                       |
| 11                                          | Search software used, name and version, including special features used (eg, explosion)                                                                                                                                                                                      | 5                       |
| 12                                          | Use of hand searching (eg, reference lists of obtained articles)                                                                                                                                                                                                             | 6                       |
| 13                                          | List of citations located and those excluded, including justification                                                                                                                                                                                                        | Fig 1                   |
| 14                                          | Method of addressing articles published in languages other than English                                                                                                                                                                                                      | 4-5                     |
| 15                                          | Method of handling abstracts and unpublished studies                                                                                                                                                                                                                         | -                       |
| 16                                          | Description of any contact with authors                                                                                                                                                                                                                                      | -                       |
| Reporting of methods should include         |                                                                                                                                                                                                                                                                              |                         |
| 17                                          | Description of relevance or appropriateness of studies assembled for assessing the hypothesis to be tested                                                                                                                                                                   | 4-5                     |
| 18                                          | Rationale for the selection and coding of data (eg, sound clinical principles or convenience)                                                                                                                                                                                | 4-5                     |
| 19                                          | Documentation of how data were classified and coded (eg, multiple raters, blinding and interrater reliability)                                                                                                                                                               | 4                       |
| 20                                          | Assessment of confounding (eg, comparability of cases and controls in studies where appropriate)                                                                                                                                                                             | -                       |
| 21                                          | Assessment of study quality, including blinding of quality assessors, stratification or regression on possible predictors of study results                                                                                                                                   | 4-5                     |
| 22                                          | Assessment of heterogeneity                                                                                                                                                                                                                                                  | 5                       |
| 23                                          | Description of statistical methods (eg, complete description of fixed or random effects models, justification of whether the chosen models account for predictors of study results, dose-response models, or cumulative meta-analysis) in sufficient detail to be replicated | 4-5                     |
| 24                                          | Provision of appropriate tables and graphics                                                                                                                                                                                                                                 | Tables 1,s1-s5<br>Fig 1 |
| Reporting of results should include         |                                                                                                                                                                                                                                                                              |                         |
| 25                                          | Graphic summarizing individual study estimates and overall estimate                                                                                                                                                                                                          | Figs 2-4                |
| 26                                          | Table giving descriptive information for each study included                                                                                                                                                                                                                 | Table 1                 |
| 27                                          | Results of sensitivity testing (eg, subgroup analysis)                                                                                                                                                                                                                       | -                       |
| 28                                          | Indication of statistical uncertainty of findings                                                                                                                                                                                                                            | -                       |

| Item No                                 | Recommendation                                                                                                            | Reported on Page No |
|-----------------------------------------|---------------------------------------------------------------------------------------------------------------------------|---------------------|
| Reporting of discussion should include  |                                                                                                                           |                     |
| 29                                      | Quantitative (eg, publication bias)                                                                                       | Table 2, Figs 2-4   |
| 30                                      | Justification for exclusion (eg, exclusion of non-English language citations)                                             | 6                   |
| 31                                      | Assessment of quality of included studies                                                                                 | 6, Tables S4        |
| Reporting of conclusions should include |                                                                                                                           |                     |
| 32                                      | Consideration of alternative explanations for observed results                                                            | 10-12               |
| 33                                      | Generalization of the conclusions (ie, appropriate for the data presented and within the domain of the literature review) | 11-12               |
| 34                                      | Guidelines for future research                                                                                            | 11                  |
| 35                                      | Disclosure of funding source                                                                                              | 12                  |

From: Stroup DF, Berlin JA, Morton SC, et al, for the Meta-analysis Of Observational Studies in Epidemiology (MOOSE) Group. Meta-analysis of Observational Studies in Epidemiology. A Proposal for Reporting. *JAMA*. 2000;283(15):2008-2012. doi: 10.1001/jama.283.15.2008.

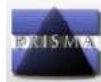

# PRISMA 2009 Checklist

| Section/topic                      | #  | Checklist item                                                                                                                                                                                                                                                                                              | Reported on page # |
|------------------------------------|----|-------------------------------------------------------------------------------------------------------------------------------------------------------------------------------------------------------------------------------------------------------------------------------------------------------------|--------------------|
| <b>TITLE</b>                       |    |                                                                                                                                                                                                                                                                                                             |                    |
| Title                              | 1  | Identify the report as a systematic review, meta-analysis, or both.                                                                                                                                                                                                                                         | 1                  |
| <b>ABSTRACT</b>                    |    |                                                                                                                                                                                                                                                                                                             |                    |
| Structured summary                 | 2  | Provide a structured summary including, as applicable: background; objectives; data sources; study eligibility criteria, participants, and interventions; study appraisal and synthesis methods; results; limitations; conclusions and implications of key findings; systematic review registration number. | 2                  |
| <b>INTRODUCTION</b>                |    |                                                                                                                                                                                                                                                                                                             |                    |
| Rationale                          | 3  | Describe the rationale for the review in the context of what is already known.                                                                                                                                                                                                                              | 3                  |
| Objectives                         | 4  | Provide an explicit statement of questions being addressed with reference to participants, interventions, comparisons, outcomes, and study design (PICOS).                                                                                                                                                  | 3                  |
| <b>METHODS</b>                     |    |                                                                                                                                                                                                                                                                                                             |                    |
| Protocol and registration          | 5  | Indicate if a review protocol exists, if and where it can be accessed (e.g., Web address), and, if available, provide registration information including registration number.                                                                                                                               | Not applicable     |
| Eligibility criteria               | 6  | Specify study characteristics (e.g., PICOS, length of follow-up) and report characteristics (e.g., years considered, language, publication status) used as criteria for eligibility, giving rationale.                                                                                                      | 4                  |
| Information sources                | 7  | Describe all information sources (e.g., databases with dates of coverage, contact with study authors to identify additional studies) in the search and date last searched.                                                                                                                                  | 4                  |
| Search                             | 8  | Present full electronic search strategy for at least one database, including any limits used, such that it could be repeated.                                                                                                                                                                               | 4                  |
| Study selection                    | 9  | State the process for selecting studies (i.e., screening, eligibility, included in systematic review, and, if applicable, included in the meta-analysis).                                                                                                                                                   | 4-5                |
| Data collection process            | 10 | Describe method of data extraction from reports (e.g., piloted forms, independently, in duplicate) and any processes for obtaining and confirming data from investigators.                                                                                                                                  | 4                  |
| Data items                         | 11 | List and define all variables for which data were sought (e.g., PICOS, funding sources) and any assumptions and simplifications made.                                                                                                                                                                       | 4                  |
| Risk of bias in individual studies | 12 | Describe methods used for assessing risk of bias of individual studies (including specification of whether this was done at the study or outcome level), and how this information is to be used in any data synthesis.                                                                                      | 5                  |
| Summary measures                   | 13 | State the principal summary measures (e.g., risk ratio, difference in means).                                                                                                                                                                                                                               | 5                  |
| Synthesis of results               | 14 | Describe the methods of handling data and combining results of studies, if done, including measures of consistency (e.g., I <sup>2</sup> ) for each meta-analysis.                                                                                                                                          | 5                  |

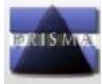

# PRISMA 2009 Checklist

Page 1 of 2

| Section/topic                 | #  | Checklist item                                                                                                                                                                                           | Reported on page # |
|-------------------------------|----|----------------------------------------------------------------------------------------------------------------------------------------------------------------------------------------------------------|--------------------|
| Risk of bias across studies   | 15 | Specify any assessment of risk of bias that may affect the cumulative evidence (e.g., publication bias, selective reporting within studies).                                                             | Not applicable     |
| Additional analyses           | 16 | Describe methods of additional analyses (e.g., sensitivity or subgroup analyses, meta-regression), if done, indicating which were pre-specified.                                                         | 4                  |
| <b>RESULTS</b>                |    |                                                                                                                                                                                                          |                    |
| Study selection               | 17 | Give numbers of studies screened, assessed for eligibility, and included in the review, with reasons for exclusions at each stage, ideally with a flow diagram.                                          | 5-6                |
| Study characteristics         | 18 | For each study, present characteristics for which data were extracted (e.g., study size, PICOS, follow-up period) and provide the citations.                                                             | 6-7                |
| Risk of bias within studies   | 19 | Present data on risk of bias of each study and, if available, any outcome level assessment (see item 12).                                                                                                | 8                  |
| Results of individual studies | 20 | For all outcomes considered (benefits or harms), present, for each study: (a) simple summary data for each intervention group (b) effect estimates and confidence intervals, ideally with a forest plot. | 8-9                |
| Synthesis of results          | 21 | Present results of each meta-analysis done, including confidence intervals and measures of consistency.                                                                                                  | 8                  |
| Risk of bias across studies   | 22 | Present results of any assessment of risk of bias across studies (see Item 15).                                                                                                                          | Not applicable     |
| Additional analysis           | 23 | Give results of additional analyses, if done (e.g., sensitivity or subgroup analyses, meta-regression [see Item 16]).                                                                                    | 8                  |
| <b>DISCUSSION</b>             |    |                                                                                                                                                                                                          |                    |
| Summary of evidence           | 24 | Summarize the main findings including the strength of evidence for each main outcome; consider their relevance to key groups (e.g., healthcare providers, users, and policy makers).                     | 10-11              |
| Limitations                   | 25 | Discuss limitations at study and outcome level (e.g., risk of bias), and at review-level (e.g., incomplete retrieval of identified research, reporting bias).                                            | 11-12              |
| Conclusions                   | 26 | Provide a general interpretation of the results in the context of other evidence, and implications for future research.                                                                                  | 11-12              |
| <b>FUNDING</b>                |    |                                                                                                                                                                                                          |                    |
| Funding                       | 27 | Describe sources of funding for the systematic review and other support (e.g., supply of data); role of funders for the systematic review.                                                               | 12                 |

41

42 From: Moher D, Liberati A, Tetzlaff J, Altman DG, The PRISMA Group (2009). Preferred Reporting Items for Systematic Reviews and Meta-Analyses: The PRISMA Statement. PLoS Med 6(7): e1000097.  
 43 doi:10.1371/journal.pmed1000097

44 For more information, visit: [www.prisma-statement.org](http://www.prisma-statement.org).

45 For peer review only - <http://bmjopen.bmj.com/site/about/guidelines.xhtml>

46

47
