# Supplementary material for: Turnover intention among primary health workers in China: a systematic review and meta-analysis
Source: PubMed Central journal article supplement — BMJ Open. 2020 Oct 16;10(10):e037117. doi: 10.1136/bmjopen-2020-037117 (PMC7569945; doi:10.1136/bmjopen-2020-037117), 2020-10-16
Supplement: bmjopen-2020-037117supp001.pdf [file bmjopen-2020-037117supp001.pdf]

**Table S1 Search strategy****Database 1: PubMed**

| Sequence | Query                                                                                                                                                                                                                                                                                                                                                                                                                                                                                                                                                                                                                                                                                                                                                      |
|----------|------------------------------------------------------------------------------------------------------------------------------------------------------------------------------------------------------------------------------------------------------------------------------------------------------------------------------------------------------------------------------------------------------------------------------------------------------------------------------------------------------------------------------------------------------------------------------------------------------------------------------------------------------------------------------------------------------------------------------------------------------------|
| #1       | Search (Chinese[MeSH Terms]) OR Chinese[Title/Abstract]                                                                                                                                                                                                                                                                                                                                                                                                                                                                                                                                                                                                                                                                                                    |
| #2       | Search (China[MeSH Terms]) OR China[Title/Abstract]                                                                                                                                                                                                                                                                                                                                                                                                                                                                                                                                                                                                                                                                                                        |
| #3       | <b>#1 OR #2</b><br>Search (((Chinese[MeSH Terms]) OR Chinese[Title/Abstract]))OR ((China[MeSH Terms]) OR China[Title/Abstract]))                                                                                                                                                                                                                                                                                                                                                                                                                                                                                                                                                                                                                           |
| #4       | Search (Health worker[MeSH Terms]) OR Health worker[Title/Abstract]                                                                                                                                                                                                                                                                                                                                                                                                                                                                                                                                                                                                                                                                                        |
| #5       | Search (Health officer[MeSH Terms]) OR Health officer[Title/Abstract]                                                                                                                                                                                                                                                                                                                                                                                                                                                                                                                                                                                                                                                                                      |
| #6       | Search (Health Manpower[MeSH Terms]) OR Health Manpower[Title/Abstract]                                                                                                                                                                                                                                                                                                                                                                                                                                                                                                                                                                                                                                                                                    |
| #7       | Search (Health Personnel[MeSH Terms]) OR Health Personnel[Title/Abstract]                                                                                                                                                                                                                                                                                                                                                                                                                                                                                                                                                                                                                                                                                  |
| #8       | Search (Medical Personnel[MeSH Terms]) OR Medical Personnel[Title/Abstract]                                                                                                                                                                                                                                                                                                                                                                                                                                                                                                                                                                                                                                                                                |
| #9       | Search (Medical worker[MeSH Terms]) OR Medical worker[Title/Abstract]                                                                                                                                                                                                                                                                                                                                                                                                                                                                                                                                                                                                                                                                                      |
| #10      | Search (Medical staff[MeSH Terms]) OR Medical staff[Title/Abstract]                                                                                                                                                                                                                                                                                                                                                                                                                                                                                                                                                                                                                                                                                        |
| #11      | Search (Doctor[MeSH Terms]) OR Doctor[Title/Abstract]                                                                                                                                                                                                                                                                                                                                                                                                                                                                                                                                                                                                                                                                                                      |
| #12      | Search (Physician[MeSH Terms]) OR Physician[Title/Abstract]                                                                                                                                                                                                                                                                                                                                                                                                                                                                                                                                                                                                                                                                                                |
| #13      | Search (Nurse[MeSH Terms]) OR Nurse [Title/Abstract]                                                                                                                                                                                                                                                                                                                                                                                                                                                                                                                                                                                                                                                                                                       |
| #14      | <b>#4 OR #5 OR #6 OR #7 OR #8 OR #9 OR #11 OR #12 OR #13</b><br>Search ((((((((((Health worker[MeSH Terms]) OR Health worker[Title/Abstract])) OR ((Health officer[MeSH Terms]) OR Health officer[Title/Abstract])) OR ((Health Manpower[MeSH Terms]) OR Health Manpower[Title/Abstract])) OR ((Health Personnel[MeSH Terms]) OR Health Personnel[Title/Abstract])) OR ((Medical Personnel[MeSH Terms]) OR Medical Personnel[Title/Abstract])) OR ((Medical worker[MeSH Terms]) OR Medical worker[Title/Abstract])) OR ((Medical staff[MeSH Terms]) OR Medical staff[Title/Abstract])) OR ((Doctor[MeSH Terms]) OR Doctor[Title/Abstract])) OR ((Physician[MeSH Terms]) OR Physician[Title/Abstract])) OR ((Nurse[MeSH Terms]) OR Nurse [Title/Abstract])) |
| #15      | Search (Rural[MeSH Terms]) OR Rural[Title/Abstract]                                                                                                                                                                                                                                                                                                                                                                                                                                                                                                                                                                                                                                                                                                        |
| #16      | Search (Countryside[MeSH Terms]) OR Countryside[Title/Abstract]                                                                                                                                                                                                                                                                                                                                                                                                                                                                                                                                                                                                                                                                                            |
| #17      | Search (Community[MeSH Terms]) OR Community[Title/Abstract]                                                                                                                                                                                                                                                                                                                                                                                                                                                                                                                                                                                                                                                                                                |
| #18      | Search (District[MeSH Terms]) OR District[Title/Abstract]                                                                                                                                                                                                                                                                                                                                                                                                                                                                                                                                                                                                                                                                                                  |
| #19      | Search (Basic[MeSH Terms]) OR Basic[Title/Abstract]                                                                                                                                                                                                                                                                                                                                                                                                                                                                                                                                                                                                                                                                                                        |
| #20      | Search (Fundamental[MeSH Terms]) OR Fundamental[Title/Abstract]                                                                                                                                                                                                                                                                                                                                                                                                                                                                                                                                                                                                                                                                                            |
| #21      | Search (Primary[MeSH Terms]) OR Primary[Title/Abstract]                                                                                                                                                                                                                                                                                                                                                                                                                                                                                                                                                                                                                                                                                                    |
| #22      | Search (Grass roots[MeSH Terms]) OR Grass roots[Title/Abstract]                                                                                                                                                                                                                                                                                                                                                                                                                                                                                                                                                                                                                                                                                            |
| #23      | <b>#7 OR #8 OR #9 OR #11 OR #12 OR #13 OR #14</b><br>Search (((((Primary[MeSH Terms]) OR Primary[Title/Abstract]) OR Grass roots[MeSH Terms]) OR Grass roots[Title/Abstract]) OR (((Community[MeSH Terms]) OR Community[Title/Abstract]) OR (((((((Rural[MeSH Terms]) OR Rural[Title/Abstract]) OR Countryside[MeSH Terms]) OR Countryside[Title/Abstract]) OR District[MeSH Terms]) OR District[Title/Abstract]) OR Basic[MeSH Terms]) OR Basic[Title/Abstract]) OR Fundamental[MeSH Terms]) OR Fundamental[Title/Abstract]))                                                                                                                                                                                                                             |

|     |                                                                                                                                                                                                                                                                                                                                                                                                                                                                                                                                                                                                                                                                                                                                                                                                                                                                                                                                                                                                                                                                                                                                                                                                                                                                                                                                                                                                                                                                                                                                                                                                                                                                                                          |
|-----|----------------------------------------------------------------------------------------------------------------------------------------------------------------------------------------------------------------------------------------------------------------------------------------------------------------------------------------------------------------------------------------------------------------------------------------------------------------------------------------------------------------------------------------------------------------------------------------------------------------------------------------------------------------------------------------------------------------------------------------------------------------------------------------------------------------------------------------------------------------------------------------------------------------------------------------------------------------------------------------------------------------------------------------------------------------------------------------------------------------------------------------------------------------------------------------------------------------------------------------------------------------------------------------------------------------------------------------------------------------------------------------------------------------------------------------------------------------------------------------------------------------------------------------------------------------------------------------------------------------------------------------------------------------------------------------------------------|
| #24 | Search(Turnover Intention[MeSH Terms]) OR Turnover Intention[Title/Abstract]                                                                                                                                                                                                                                                                                                                                                                                                                                                                                                                                                                                                                                                                                                                                                                                                                                                                                                                                                                                                                                                                                                                                                                                                                                                                                                                                                                                                                                                                                                                                                                                                                             |
| #25 | Search (Departure Intention[MeSH Terms]) OR Departure Intention[Title/Abstract]                                                                                                                                                                                                                                                                                                                                                                                                                                                                                                                                                                                                                                                                                                                                                                                                                                                                                                                                                                                                                                                                                                                                                                                                                                                                                                                                                                                                                                                                                                                                                                                                                          |
| #26 | Search (Demission Intention[MeSH Terms]) OR Demission Intention[Title/Abstract]                                                                                                                                                                                                                                                                                                                                                                                                                                                                                                                                                                                                                                                                                                                                                                                                                                                                                                                                                                                                                                                                                                                                                                                                                                                                                                                                                                                                                                                                                                                                                                                                                          |
| #27 | Search(Leave Intention[MeSH Terms]) OR Leave Intention[Title/Abstract]                                                                                                                                                                                                                                                                                                                                                                                                                                                                                                                                                                                                                                                                                                                                                                                                                                                                                                                                                                                                                                                                                                                                                                                                                                                                                                                                                                                                                                                                                                                                                                                                                                   |
| #28 | Search intent to leave[Title/Abstract]                                                                                                                                                                                                                                                                                                                                                                                                                                                                                                                                                                                                                                                                                                                                                                                                                                                                                                                                                                                                                                                                                                                                                                                                                                                                                                                                                                                                                                                                                                                                                                                                                                                                   |
| #29 | <b>#18 OR #19 OR #20</b><br>Search ((((((Turnover Intention[MeSH Terms]) OR Turnover Intention[Title/Abstract])) OR ((Departure Intention[MeSH Terms]) OR Departure Intention[Title/Abstract])) OR ((Demission Intention[MeSH Terms]) OR Demission Intention[Title/Abstract])) OR ((Leave Intention[MeSH Terms]) OR Leave Intention[Title/Abstract])) OR intent to leave[Title/Abstract]                                                                                                                                                                                                                                                                                                                                                                                                                                                                                                                                                                                                                                                                                                                                                                                                                                                                                                                                                                                                                                                                                                                                                                                                                                                                                                                 |
| #30 | <b>#3 AND #10 AND #17 AND #21</b><br>Search ((((((((((Turnover Intention[MeSH Terms]) OR Turnover Intention[Title/Abstract])) OR ((Departure Intention[MeSH Terms]) OR Departure Intention[Title/Abstract])) OR ((Demission Intention[MeSH Terms]) OR Demission Intention[Title/Abstract])) OR ((Leave Intention[MeSH Terms]) OR Leave Intention[Title/Abstract])) OR intent to leave[Title/Abstract])) AND ((((((((((Primary[MeSH Terms]) OR Primary[Title/Abstract]) OR Grass roots[MeSH Terms]) OR Grass roots[Title/Abstract]) OR (((Community[MeSH Terms]) OR Community[Title/Abstract]) OR ((((((((((Rural[MeSH Terms]) OR Rural[Title/Abstract]) OR Countryside[MeSH Terms]) OR Countryside[Title/Abstract]) OR District[MeSH Terms]) OR District[Title/Abstract]) OR Basic[MeSH Terms]) OR Basic[Title/Abstract]) OR fundamental[MeSH Terms]) OR fundamental[Title/Abstract])))) AND ((((((((((((((Health worker[MeSH Terms]) OR Health worker[Title/Abstract])) OR ((Health officer[MeSH Terms]) OR Health worker[Title/Abstract])) OR ((Health Manpower[MeSH Terms]) OR Health Manpower[Title/Abstract])) OR ((Health Personnel[MeSH Terms]) OR Health Personnel[Title/Abstract])) OR ((Medical Personnel[MeSH Terms]) OR Medical Personnel[Title/Abstract])) OR ((Medical worker[MeSH Terms]) OR Medical worker[Title/Abstract])) OR ((Medical staff[MeSH Terms]) OR Medical staff[Title/Abstract])) OR ((Doctor[MeSH Terms]) OR Doctor[Title/Abstract])) OR ((Physician[MeSH Terms]) OR Physician[Title/Abstract])) OR ((Nurse[MeSH Terms]) OR Nurse [Title/Abstract])))) AND ((((((Chinese[MeSH Terms]) OR Chinese[Title/Abstract])) OR (China[MeSH Terms]) OR China[Title/Abstract]))))))) |

**Database 2: EMBASE**

| Sequence | Query                                                                                                                                                                                    |
|----------|------------------------------------------------------------------------------------------------------------------------------------------------------------------------------------------|
| #1       | 'China'/exp                                                                                                                                                                              |
| #2       | 'China':ti,ab                                                                                                                                                                            |
| #3       | #1 OR #2                                                                                                                                                                                 |
| #4       | 'Turnover Intention' OR 'Departure Intention' OR 'Demission Intention' OR 'Leave Intention'/exp                                                                                          |
| #5       | 'Turnover Intention' OR 'Departure Intention' OR 'Demission Intention' OR 'Leave Intention' OR 'intent to leave':ti,ab                                                                   |
| #6       | #4 OR #5                                                                                                                                                                                 |
| #7       | 'Primary' OR 'Grass roots' OR 'Community' OR 'Countryside' OR 'District' OR 'Basic' OR 'Rural' OR 'Fundamental':ti,ab                                                                    |
| #8       | 'Health worker' OR 'Health officer' OR 'Health Manpower' OR 'Health Personnel' OR 'Medical Personnel' OR 'Medical worker' OR 'Medical staff' OR 'Doctor' OR 'Physician' OR 'Nurse':ti,ab |

|    |                         |
|----|-------------------------|
| #9 | #3 AND #6 AND #7 AND #8 |
|----|-------------------------|

**Database 3: Cochrane Library**

| Sequence | Query                                                                                                                                                                                             |
|----------|---------------------------------------------------------------------------------------------------------------------------------------------------------------------------------------------------|
| #1       | china:ti,ab,kw (Word variations have been searched)                                                                                                                                               |
| #2       | chinese:ti,ab,kw(Word variations have been searched)                                                                                                                                              |
| #3       | #1 or #2                                                                                                                                                                                          |
| #4       | (turnover intention):ti,ab,kw OR (departure Intention):ti,ab,kw OR (demission Intention):ti,ab,kw OR (leave Intention):ti,ab,kw OR (intent to leave):ti,ab,kw(Word variations have been searched) |
| #5       | (primary):ti,ab,kw OR (community):ti,ab,kw OR (rural):ti,ab,kw OR (basic):ti,ab,kw OR (countryside):ti,ab,kw(Word variations have been searched)                                                  |
| #6       | (health worker):ti,ab,kw OR (health manpower):ti,ab,kw OR (health personnel):ti,ab,kw OR (health officer):ti,ab,kw(Word variations have been searched)                                            |
| #7       | (medical worker):ti,ab,kw OR (medical staff):ti,ab,kw OR (doctor):ti,ab,kw OR (physician):ti,ab,kw OR (nurse):ti,ab,kw(Word variations have been searched)                                        |
| #8       | #5 or #6                                                                                                                                                                                          |
| #9       | #3 and #4 and #5 and #8                                                                                                                                                                           |

**Database 4: PsycINFO**

| Sequence | Query                                                                                                                                                                                                                                                                                                                                                                                                                                                                                                      |
|----------|------------------------------------------------------------------------------------------------------------------------------------------------------------------------------------------------------------------------------------------------------------------------------------------------------------------------------------------------------------------------------------------------------------------------------------------------------------------------------------------------------------|
| #1       | Title: china OR Abstract: china OR Title: chinese OR Abstract: chinese                                                                                                                                                                                                                                                                                                                                                                                                                                     |
| #2       | Title: turnover intention OR Abstract: turnover intention OR Title: Departure Intention OR Abstract: Departure Intention OR Title: Demission Intention OR Abstract: Demission Intention OR Title: Leave Intention OR Abstract: Leave Intention OR Abstract: intent to leave                                                                                                                                                                                                                                |
| #3       | Title: Health worker OR Abstract: Health worker OR Title: Health officer OR Abstract: Health officer OR Title: Health Manpower OR Abstract: Health Manpower OR Title: Health Personnel OR Abstract: Health Personnel OR Title: Medical Personnel OR Abstract: Medical Personnel OR Title: Medical worker OR Abstract: Medical worker OR Title: Medical staff OR Abstract: Medical staff OR Title: Doctor OR Abstract: Doctor OR Title: Physician OR Abstract: Physician OR Title: Nurse OR Abstract: Nurse |
| #4       | Title: Rural OR Abstract: Rural OR Title: Countryside OR Abstract: Countryside OR Title: Community OR Abstract: Community OR Title: District OR Abstract: District OR Title: Basic OR Abstract: Basic OR Title: Fundamental OR Abstract: Fundamental OR Title: Primary OR Abstract: Primary OR Title: Grass roots OR Abstract: Grass roots                                                                                                                                                                 |
| #5       | #1 AND #2 AND #3 AND #4                                                                                                                                                                                                                                                                                                                                                                                                                                                                                    |

**Database 5: CAJD (CNKI)**

SU=(‘医生’+‘医务人员’+‘护士’+‘卫生人员’)AND SU=(‘离职意愿’+‘离职倾向’+‘离职意向’+‘留职意愿’+‘工作意愿’+‘留职意向’)  
AND SU=(‘基层’+‘社区’+‘农村’+‘乡镇卫生院’+‘卫生服务中心’)

**Database 6: CSPD (WANFANG Data)**

(题名或关键词:(社区)+题名或关键词:(农村)+题名或关键词:(基层) +题名或关键词:(乡镇卫生院) +题名或关键词:(卫生服务中心))\*  
(题名或关键词:(离职意愿)+题名或关键词:(离职倾向)+题名或关键词:(离职意向)) +题名或关键词:(留职意愿)) +  
题名或关键词:(工作意愿)) +题名或关键词:(留职意向)) \*(题名或关键词:(医生)+题名或关键词:(护士)+题名或关键词:(医务人员) +  
题名或关键词:(卫生人员))

**Database 7: CBM**

((("社区"[标题:智能]) OR "基层"[标题:智能]) OR "农村"[标题:智能]) OR "乡镇卫生院"[标题:智能]) OR "卫生服务中心"[标题:智能]) AND (((("离职意愿"[标题:智能]) OR "离职倾向"[标题:智能]) OR "离职意向"[标题:智能]) OR "留职意愿"[标题:智能]) OR "工作意愿"[标题:智能]) OR "留职意向"[标题:智能]) AND (((("医生"[标题:智能]) OR "护士"[标题:智能]) OR "卫生人员"[标题:智能]) OR "医务人员"[标题:智能])

**Table S2 The inter-rater reliability for the title abstract screening by the two authors**

|           | Title    |          | Abstract |          |
|-----------|----------|----------|----------|----------|
|           | Author 1 | Author 2 | Author 1 | Author 2 |
| Included  | 120      | 112      | 89       | 83       |
| Excluded  | 88       | 96       | 25       | 31       |
| Agreement | 200      |          | 108      |          |
| Sum       | 208      |          | 114      |          |
| Rate      | 96.15%   |          | 94.74%   |          |

**Table S3 47 factors related to TI**

| Group | Category           | Exposure                                                                                                                                                                                                                                                                                                                                                                                                                                                                                                                                                                                                                                 |
|-------|--------------------|------------------------------------------------------------------------------------------------------------------------------------------------------------------------------------------------------------------------------------------------------------------------------------------------------------------------------------------------------------------------------------------------------------------------------------------------------------------------------------------------------------------------------------------------------------------------------------------------------------------------------------------|
| A     | Demographic        | A1-gender, A2-age, A3-education, A4-region, A5-marital status, A6-nation, A7-major,                                                                                                                                                                                                                                                                                                                                                                                                                                                                                                                                                      |
| B     | Job characteristic | B1-occupation, B2-job title, B3-work seniority, B4-qualified to practice, B5- remuneration, B6-medical institution, B7-organizational affiliation, B8- re-employ after retirement, B9-turnover experience, B10-individual income levels in the local, B11-work stress, B12-emotional exhaustion, B13-flattening of affect, B14-public health service, B15- working hours, B16-career planning, B17-career identity, B18-Social status B19-influence family life, B20-living condition, B21-lack of insurance, B22-patient trust.                                                                                                         |
| C     | Job satisfaction   | C1-learning and training opportunities, C2-promotion and individual development space, C3-interpersonal relationship, C4-work conditions and environment, C5- sense of accomplishment, C6-scientific research atmosphere, C7-level of attention by leaders, C8-income satisfaction, C9-keep busy and fulfilling, C10-the competence of my manager in making decisions, C11-work stability, C12-policies practice, C13-the chance to try my own methods of doing the job, C14-the chance to do something that makes use of my abilities, C15-job satisfaction, C16-work support, C17-income fairness, C18-motivation and salary system ., |

**Table S4 Quality scores assessing risk of bias using a modified Newcastle-Ottawa scale**

| Study type: Cross-sectional; Score: 1=achieved, 0=not achieved |                                  |             |                 |                               |                                                                                 |                           |                                 |             |
|----------------------------------------------------------------|----------------------------------|-------------|-----------------|-------------------------------|---------------------------------------------------------------------------------|---------------------------|---------------------------------|-------------|
| Authors                                                        | Representativeness of the sample | Sample size | Non-respondents | Ascertainment of the exposure | Comparability of subjects in different outcome groups (control for confounding) | Assessment of the outcome | Statistical test is appropriate | Total score |
| Xu,2012                                                        | 1                                | 1           | 0               | 1                             | 1                                                                               | 1                         | 1                               | 6           |
| Gu,2012                                                        | 0                                | 1           | 0               | 1                             | 1                                                                               | 1                         | 1                               | 5           |
| Yao,2011                                                       | 0                                | 1           | 0               | 1                             | 0                                                                               | 1                         | 1                               | 4           |
| Lu,2018                                                        | 1                                | 1           | 0               | 1                             | 0                                                                               | 1                         | 1                               | 5           |
| Ou,2018                                                        | 1                                | 1           | 0               | 1                             | 1                                                                               | 1                         | 1                               | 6           |
| Xu,2015                                                        | 0                                | 1           | 0               | 1                             | 1                                                                               | 1                         | 1                               | 5           |
| Liu,2019                                                       | 1                                | 1           | 0               | 1                             | 1                                                                               | 1                         | 1                               | 6           |
| Zhang,2013                                                     | 0                                | 1           | 0               | 1                             | 1                                                                               | 1                         | 1                               | 5           |
| Liu,2017                                                       | 1                                | 1           | 0               | 1                             | 0                                                                               | 1                         | 1                               | 5           |
| Shen,2018                                                      | 1                                | 1           | 0               | 1                             | 1                                                                               | 1                         | 1                               | 6           |
| Zhou,2016                                                      | 0                                | 1           | 0               | 1                             | 0                                                                               | 1                         | 1                               | 4           |
| Zhang,2015                                                     | 0                                | 1           | 0               | 1                             | 1                                                                               | 1                         | 1                               | 5           |
| Wan,2013                                                       | 0                                | 1           | 0               | 1                             | 0                                                                               | 1                         | 1                               | 4           |
| Fang,2014                                                      | 1                                | 1           | 0               | 1                             | 1                                                                               | 1                         | 1                               | 6           |
| Sun,2013                                                       | 1                                | 1           | 0               | 1                             | 1                                                                               | 1                         | 1                               | 6           |
| Liu JL,2019                                                    | 1                                | 1           | 0               | 1                             | 1                                                                               | 1                         | 1                               | 6           |

Table S5 Meta-analyses on 19 factors

| Exposure                                      | No. of studies in<br>Meta-analyses | Comparison model                                                                           | Q test         |           | Statistical<br>model | Pooled OR<br>OR (95% CI) | Z test<br>P-value | Egger<br>P> t |
|-----------------------------------------------|------------------------------------|--------------------------------------------------------------------------------------------|----------------|-----------|----------------------|--------------------------|-------------------|---------------|
|                                               |                                    |                                                                                            | I <sup>2</sup> | P-value   |                      |                          |                   |               |
| <b>Demographic factors</b>                    |                                    |                                                                                            |                |           |                      |                          |                   |               |
| Gender                                        | 13                                 | Male vs. female                                                                            | 66%            | 0.0004    | Random-effect        | 1.23 [1.08, 1.40]        | 0.002             | 0.240         |
| Age                                           | 7                                  | Younger (<35) vs. older (≥35)                                                              | 56%            | 0.04      | Random-effect        | 1.47 [1.24, 1.74]        | < 0.00001         | 0.368         |
| Education                                     | 10                                 | Low-education (junior college or below)<br>vs. high-education(bachelor degree or<br>above) | 91%            | < 0.00001 | Random-effect        | 0.78 [0.60,1.02]         | 0.07              | 0.325         |
| Marital status                                | 7                                  | Unmarried vs. married                                                                      | 37%            | 0.15      | Fixed-effect         | 1.16 [1.04, 1.29]        | 0.007             | 0.095         |
| <b>Job characteristic factors</b>             |                                    |                                                                                            |                |           |                      |                          |                   |               |
| Occupation                                    | 5                                  | Doctor vs. nurse                                                                           | 78%            | 0.001     | Random-effect        | 1.05 [0.78, 1.41]        | 0.76              | 0.221         |
| Job title                                     | 9                                  | Low-title (no title or junior title) vs. high-<br>title (middle title or senior title)     | 49%            | 0.05      | Fixed-effect         | 1.11 [1.03, 1.21]        | 0.007             | 0.223         |
| Work seniority                                | 3                                  | Short (<10) vs. long (≥10)                                                                 | 50%            | 0.13      | Fixed-effect         | 1.12 [1.82, 1.52]        | 0.48              | 0.117         |
| Organizational affiliation                    | 4                                  | Authorized personnel vs. others                                                            | 38%            | 0.20      | Fixed-effect         | 0.85 [0.73, 1.00]        | < 0.00001         | 0.400         |
| Work stress                                   | 5                                  | High vs. low                                                                               | 0%             | 0.62      | Fixed-effect         | 3.14 [2.73, 3.61]        | < 0.00001         | 0.169         |
| <b>Job satisfaction factors</b>               |                                    |                                                                                            |                |           |                      |                          |                   |               |
| Overall job satisfaction                      | 3                                  | Satisfied vs. dissatisfied                                                                 | 91%            | < 0.0001  | Random-effect        | 0.15 [0.04, 0.51]        | 0.002             | 0.561         |
| Promotion and individual<br>development space | 3                                  | Satisfied vs. dissatisfied                                                                 | 56%            | 0.10      | Random-effect        | 0.19 [0.12, 0.29]        | < 0.00001         | 0.160         |
| Interpersonal relationship                    | 3                                  | Satisfied vs. dissatisfied                                                                 | 0%             | 0.80      | Fixed-effect         | 0.20 [0.15, 0.28]        | < 0.00001         | 0.522         |
| Keep busy and fulfilling                      | 4                                  | Satisfied vs. dissatisfied                                                                 | 61%            | 0.05      | Random-effect        | 0.39 [0.33, 0.47]        | < 0.00001         | 0.162         |
| Sense of accomplishment                       | 3                                  | Satisfied vs. dissatisfied                                                                 | 85%            | 0.001     | Random-effect        | 0.16 [0.08, 0.32]        | < 0.00001         | 0.291         |



---

|                                                  |   |                            |     |           |               |                   |           |       |
|--------------------------------------------------|---|----------------------------|-----|-----------|---------------|-------------------|-----------|-------|
| Income satisfaction                              | 5 | Satisfied vs. dissatisfied | 94% | < 0.00001 | Random-effect | 0.33 [0.11, 0.95] | 0.04      | 0.216 |
| Work condition and environment                   | 5 | Satisfied vs. dissatisfied | 0%  | 0.59      | Fixed-effect  | 0.19 [0.15, 0.23] | < 0.00001 | 0.153 |
| Attention by leaders                             | 3 | Satisfied vs. dissatisfied | 0%  | 0.76      | Fixed-effect  | 0.20 [0.15, 0.26] | < 0.00001 | 0.120 |
| The competence of my manager in making decisions | 3 | Satisfied vs. dissatisfied | 70% | 0.04      | Random-effect | 0.18 [0.10, 0.32] | < 0.00001 | 0.210 |
| Motivation and salary system                     | 3 | Satisfied vs. dissatisfied | 69% | 0.04      | Random-effect | 0.21 [0.11, 0.38] | < 0.00001 | 0.161 |

---
